# Supplementary material
Source: MDPI journal article supplement (https://www.mdpi.com/2073-4344/12/12/1610)

# Supporting Information

for

## Chemoenzymatic Synthesis of Optically Active Alcohols Possessing 1,2,3,4-Tetrahydroquinoline Moiety Employing Lipases or Variants of the Acyltransferase from *Mycobacterium smegmatis*

Beata Zdun,<sup>a</sup> Izabela Kopińska,<sup>a</sup> Maciej Dranka,<sup>b</sup> Tamara Reiter,<sup>c</sup>

Wolfgang Kroutil<sup>c</sup> and Paweł Borowiecki<sup>a,\*</sup>

<sup>a</sup> Laboratory of Biocatalysis and Biotransformation, Department of Drugs Technology and Biotechnology, Faculty of Chemistry, Warsaw University of Technology, Koszykowa St. 75, 00–662 Warsaw, Poland.

<sup>b</sup> Department of Inorganic Chemistry and Solid State Technology, Faculty of Chemistry, Warsaw University of Technology, Noakowskiego 3, 00–664, Warsaw, Poland.

<sup>c</sup> Institute of Chemistry, University of Graz, NAWI Graz, BioTechMed Graz, Field of Excellence BioHealth, Heinrichstrasse 28, 8010 Graz, Austria.

\*Corresponding author. Dr. Paweł Borowiecki (Email: pawel.borowiecki@pw.edu.pl; www: <http://lbb-wut-borowiecki.ch.pw.edu.pl/>)

### Table of contents

|                                                                                                                 |         |
|-----------------------------------------------------------------------------------------------------------------|---------|
| 1. <b>Table S1.</b> List of commercial enzyme preparations employed in these studies .....                      | S2      |
| 2. <b>Table S2.</b> The results of specific rotation values for the EKR products .....                          | S3      |
| 3. <b>Table S3.</b> Analytical separation conditions of studied compounds by GC column .....                    | S4      |
| 4. <b>Table S4.</b> HPLC analytical separation conditions of racemic alcohols and acetates .....                | S5      |
| 5. <b>Table S5.</b> Crystal data and structure refinement parameters for (S)-(+)- <b>2c</b> .....               | S6      |
| 6. <b>Table S6.</b> Atomic Occupancies for carbon atoms that are not fully occupied in (S)-(+)- <b>2c</b> ..... | S6      |
| 7. <b>Figure S1.</b> The geometry of two conformations observed for (S)-(+)- <b>2c</b> molecule .....           | S7      |
| 8. <b>Figure S2.</b> Crystal packing of (S)-(+)- <b>2c</b> showing H-bond topology .....                        | S7      |
| 9. <b>Table S7.</b> Hydrogen Bond information for (S)-(+)- <b>2c</b> .....                                      | S8      |
| 10. <b>Figure S3.</b> Crystal structure of (S)-(+)- <b>2c</b> with the atom numbering scheme .....              | S8      |
| 11. <b>Table S8.</b> Bond Lengths in Å for (S)-(+)- <b>2c</b> .....                                             | S9      |
| 12. <b>Table S9.</b> Bond Angles in ° for (S)-(+)- <b>2c</b> .....                                              | S9      |
| 13. <b>Table S10.</b> Torsion Angles in ° for (S)-(+)- <b>2c</b> .....                                          | S10     |
| 14. Copies of HPLC chromatograms .....                                                                          | S11–S74 |
| 15. Copies of NMR, FTMS, and IR spectra .....                                                                   | S75–S86 |

**Table S1. List of commercial enzyme preparations employed in these studies.**

| Enzyme and its origin (microorganism/tissue)                                   | Enzyme preparation <sup>[a]</sup> (brand name) | Usage form of enzyme preparation                                                                         | Enzyme specified activity                   | Commercial supplier (Cat. No.)                                                |
|--------------------------------------------------------------------------------|------------------------------------------------|----------------------------------------------------------------------------------------------------------|---------------------------------------------|-------------------------------------------------------------------------------|
| Lipase from <i>Candida antarctica</i> B (CAL-B)                                | Novozym 435                                    | immobilized on the macroporous acrylic resin [poly (methyl methacrylate-co-butyl methacrylate)]          | >10000 U/g or 10 PLU/mg, water content 1.4% | Novozymes A/S (Bagsvaerd, Denmark)                                            |
|                                                                                | Novozym 435-STREM                              | immobilized on a hydrophobic carrier (acrylic resin)                                                     | 10000 PLU/g                                 | STREM Chemicals, INC. (cat. nr.: 06-3123) in collaboration with Novozymes A/S |
|                                                                                | Lipozyme 435                                   | immobilized on Lewatit VP OC 1600                                                                        | unspecified                                 | Novozymes A/S (Bagsvaerd, Denmark)                                            |
|                                                                                | Chirazyme L-2, c.-f., C2, Lyo.                 | immobilized on the carrier-fixed on (carrier 2)                                                          | 150 kU                                      | Roche                                                                         |
|                                                                                | Chirazyme L-2, c.-f., C3, Lyo.                 | immobilized on the carrier-fixed on (carrier 3)                                                          | 150 kU                                      | Roche                                                                         |
| Lipase from <i>Burkholderia cepacia</i> (formerly <i>Pseudomonas cepacia</i> ) | Amano PS                                       | native                                                                                                   | >23.000 U/g                                 | Amano Pharmaceutical Co., Ltd.                                                |
|                                                                                | Amano PS-IM                                    | immobilized on diatomite                                                                                 | 500 U/g                                     | Amano Pharmaceutical Co., Ltd.                                                |
| Lipase from <i>Pseudomonas fluorescens</i>                                     | Amano AK                                       | native                                                                                                   | >20.000 U/g                                 | Amano Pharmaceutical Co., Ltd.                                                |
| Lipase from <i>Thermomyces lanuginosus</i>                                     | Lipozyme TL IM                                 | immobilized on a non-compressible silica gel carrier into an immobilized granulate (a silica granulated) | 170 IUN/g                                   | Novozymes A/S (Bagsvaerd, Denmark)                                            |
| Lipase from <i>Rhizomucor miehei</i>                                           | Lipozyme RM IM                                 | immobilized on macroporous anion-exchange resin                                                          | 150 IU/g                                    | Novozymes A/S (Bagsvaerds, Denmark)                                           |
| Lipase from <i>Candida rugosa</i>                                              | Lipase from <i>Candida rugosa</i> Type VII     | native                                                                                                   | ≥700 unit/mg                                | Sigma-Aldrich (cat. nr.: L1754)                                               |
| Lipase from wheat germ                                                         | Lipase from wheat germ Type I                  | native                                                                                                   | 5-15 units/mg                               | Sigma-Aldrich (cat. nr.: L3001)                                               |
| Lipase from <i>Rhizopus niveus</i>                                             | Lipase from <i>Rhizopus niveus</i>             | native                                                                                                   | ≥1.5 U/mg                                   | Sigma-Aldrich (cat. nr.: 62310)                                               |

[a] All commercial formulations of enzymes studied herein were used without any pretreatment.

**Table S2. The results of specific rotation values for the EKR products.**

| Product of EKR                                                                                          | ee [%] | Measured<br>specific rotation<br>$[\alpha]_D$             | Literature<br>specific rotation<br>$[\alpha]_D^{\text{lit.}}$ |
|---------------------------------------------------------------------------------------------------------|--------|-----------------------------------------------------------|---------------------------------------------------------------|
| <br>(S)-(+)- <b>2a</b> | 98     | $[\alpha]_D^{26.0} = +22.75$ (c 1.06, CHCl <sub>3</sub> ) | Lack of data                                                  |
| <br>(R)-(-)- <b>3a</b> | 99     | $[\alpha]_D^{28.0} = +4.90$ (c 1.02, CHCl <sub>3</sub> )  | Lack of data                                                  |
| <br>(S)-(+)- <b>2b</b> | >99    | $[\alpha]_D^{28.0} = +19.42$ (c 1.03, CHCl <sub>3</sub> ) | Lack of data                                                  |
| <br>(R)-(-)- <b>3b</b> | 98     | $[\alpha]_D^{28.0} = +4.85$ (c 1.03, CHCl <sub>3</sub> )  | Lack of data                                                  |
| <br>(S)-(+)- <b>2c</b> | >99    | $[\alpha]_D^{28.0} = +75.12$ (c 1.02, CHCl <sub>3</sub> ) | Lack of data                                                  |
| <br>(R)-(-)- <b>3c</b> | 94     | $[\alpha]_D^{28.0} = +23.90$ (c 1.02, CHCl <sub>3</sub> ) | Lack of data                                                  |

**Table S3. Analytical separation conditions of studied compounds by GC column.**

| Compound                                                                                        | Temperature program [°C] | Retention time [min] |
|-------------------------------------------------------------------------------------------------|--------------------------|----------------------|
| 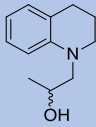<br>$rac-2a$   | 150–260 (10 °C/min)      | 6.04                 |
| <br>$rac-3a$   |                          | 6.86                 |
| <br>$rac-2b$   | 150–260 (10 °C/min)      | 6.71                 |
| <br>$rac-3b$   |                          | 7.61                 |
| <br>$rac-2c$  | 200–260 (10 °C/min)      | 7.28                 |
| <br>$rac-3c$ |                          | 7.50                 |

**Table S4. HPLC analytical separation conditions of racemic alcohols and acetates.**

| Compound                                                                                             | HPLC Column    | Mobile Phase                              | Flow Rate<br>[mL/min]<br>/ Pressure<br>[MPa] | Detection<br>[nm] /<br>Temperature<br>[°C] | Retention<br>Time<br>[min]                        |
|------------------------------------------------------------------------------------------------------|----------------|-------------------------------------------|----------------------------------------------|--------------------------------------------|---------------------------------------------------|
|                                                                                                      |                | <i>n</i> -Hexane/IPA [v/v] <sup>[a]</sup> |                                              |                                            |                                                   |
| 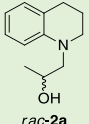<br><i>rac-2a</i>   | Chiralcel OJ-H | 90:10                                     | 0.8 / 3.6                                    | 260 / 30                                   | 8.495 ( <i>S</i> )<br>and<br>9.120 ( <i>R</i> )   |
| <br><i>rac-3a</i>   | Chiralcel OJ-H | 90:10                                     | 0.8 / 3.6                                    | 260 / 30                                   | 7.369 ( <i>S</i> )<br>and<br>7.955 ( <i>R</i> )   |
| <br><i>rac-2b</i>   | Chiralcel OJ-H | 97:3                                      | 0.8 / 3.4                                    | 260 / 30                                   | 15.023 ( <i>S</i> )<br>and<br>16.400 ( <i>R</i> ) |
| <br><i>rac-3b</i>   | Chiralcel OJ-H | 97:3                                      | 0.8 / 3.4                                    | 260 / 30                                   | 8.831 ( <i>S</i> )<br>and<br>9.866 ( <i>R</i> )   |
| <br><i>rac-2c</i>  | Chiralcel OD-H | 98:2                                      | 0.8 / 3.5                                    | 260 / 30                                   | 38.392 ( <i>S</i> )<br>and<br>41.245 ( <i>R</i> ) |
| <br><i>rac-3c</i> | Chiralcel OD-H | 99:1                                      | 0.7 / 3.0                                    | 260 / 30                                   | 23.062 ( <i>S</i> )<br>and<br>24.774 ( <i>R</i> ) |

<sup>[a]</sup> IPA states for 2-PrOH (propan-2-ol).

**Table S5.** Crystal data and structure refinement parameters for (S)-(+)-**2c**

| Compound                     | (S)-(+)- <b>2c</b>                                            |
|------------------------------|---------------------------------------------------------------|
| Formula                      | C <sub>12</sub> H <sub>16</sub> N <sub>2</sub> O <sub>3</sub> |
| $D_{calc.}/\text{g cm}^{-3}$ | 1.342                                                         |
| $\mu/\text{mm}^{-1}$         | 0.803                                                         |
| Formula Weight               | 236.27                                                        |
| Size/ $\text{mm}^3$          | 0.83×0.50×0.17                                                |
| $T/\text{K}$                 | 293                                                           |
| Crystal System               | monoclinic                                                    |
| Flack Parameter              | 0.03(9)                                                       |
| Space Group                  | $P2_1$                                                        |
| $a/\text{\AA}$               | 9.1028(2)                                                     |
| $b/\text{\AA}$               | 5.18900(10)                                                   |
| $c/\text{\AA}$               | 12.4899(3)                                                    |
| $\alpha/^\circ$              | 90                                                            |
| $\beta/^\circ$               | 97.670(2)                                                     |
| $\gamma/^\circ$              | 90                                                            |
| $V/\text{\AA}^3$             | 584.68(2)                                                     |
| $Z$                          | 2                                                             |
| $Z'$                         | 1                                                             |
| Wavelength/ $\text{\AA}$     | 1.54184                                                       |
| Radiation type               | Cu K $\alpha$                                                 |
| $\Theta_{min}/^\circ$        | 3.571                                                         |
| $\Theta_{max}/^\circ$        | 67.002                                                        |
| Measured Refl's.             | 18271                                                         |
| Indep't Refl's               | 2086                                                          |
| Refl's $I \geq 2\sigma(I)$   | 1998                                                          |
| $R_{int}$                    | 0.0673                                                        |
| Parameters                   | 164                                                           |
| Restraints                   | 5                                                             |
| Largest Peak                 | 0.122                                                         |
| Deepest Hole                 | -0.125                                                        |
| GooF                         | 1.043                                                         |
| $wR_2$ (all data)            | 0.0773                                                        |
| $wR_2$                       | 0.0760                                                        |
| $R_1$ (all data)             | 0.0305                                                        |
| $R_1$                        | 0.0290                                                        |

**Table S6.** Atomic Occupancies for carbon atoms that are not fully occupied in (S)-(+)-**2c**.

| Atom | Occupancy |
|------|-----------|
| C2   | 0.951(5)  |
| C2A  | 0.049(5)  |

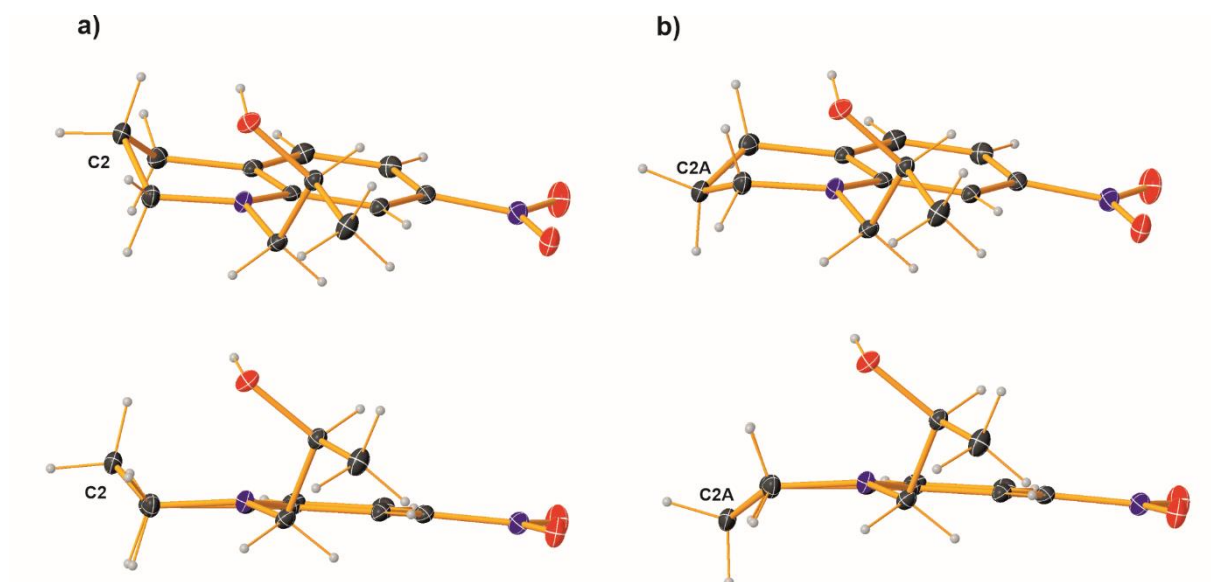

**Figure S1.** The geometry of two conformations observed for (*S*)-(+)-**2c** molecule in the solid state a) primary (95.1%), b) secondary (4.9%)

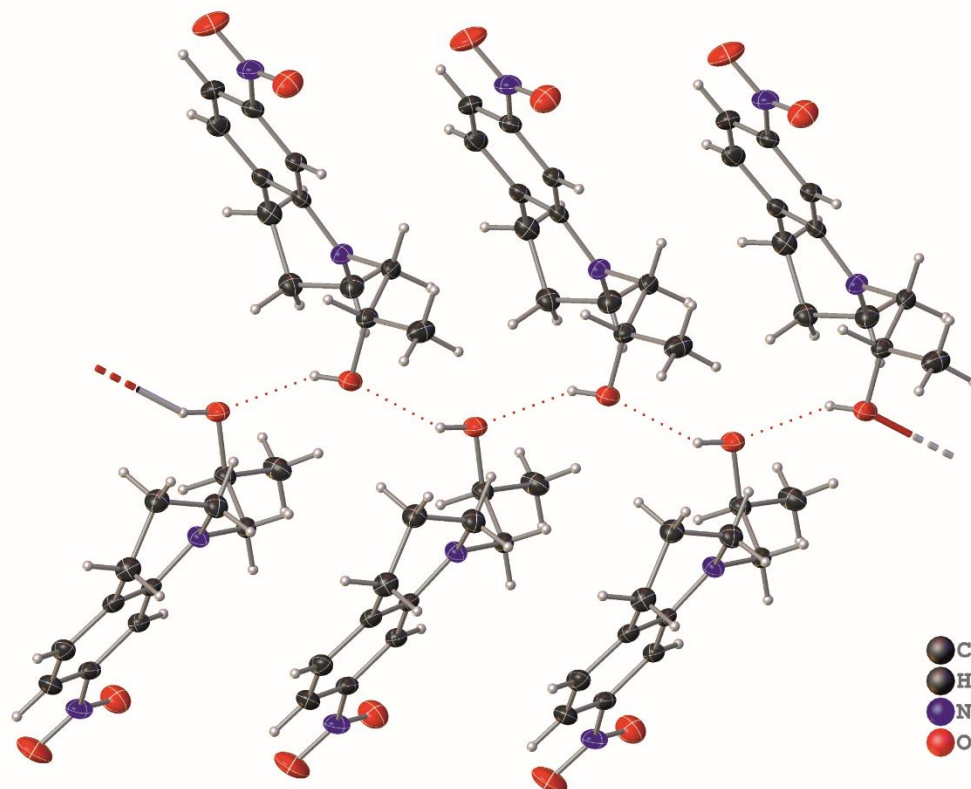

**Figure S2.** Crystal packing of (*S*)-(+)-**2c** showing H-bond topology.

**Table S7.** Hydrogen Bond information for (*S*)-(+)-**2c**.

| D  | H  | A               | d(D-H)/Å | d(H-A)/Å | d(D-A)/Å   | D-H-A/deg |
|----|----|-----------------|----------|----------|------------|-----------|
| O1 | H1 | O1 <sup>1</sup> | 0.82(3)  | 2.23(3)  | 2.9827(16) | 154(2)    |

-----  
<sup>1</sup>1-x,1/2+y,2-z

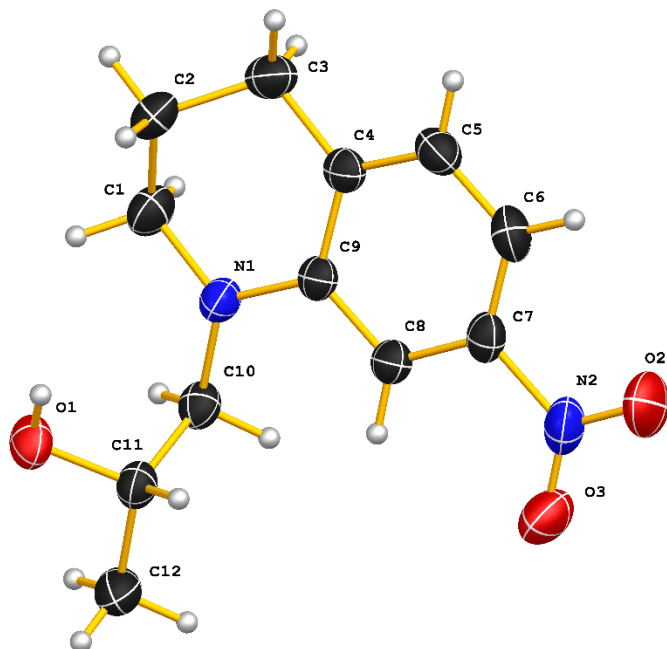

**Figure S3.** Crystal structure of (*S*)-(+)-**2c** with the atom numbering scheme.



**Table S8.** Bond Lengths in Å for (*S*)-(+)-**2c**.

| Atom | Atom | Length/Å  |
|------|------|-----------|
| O1   | C11  | 1.438(2)  |
| O2   | N2   | 1.220(3)  |
| O3   | N2   | 1.216(3)  |
| N1   | C1   | 1.457(2)  |
| N1   | C9   | 1.384(2)  |
| N1   | C10  | 1.454(2)  |
| N2   | C7   | 1.470(3)  |
| C1   | C2   | 1.500(3)  |
| C1   | C2A  | 1.499(12) |
| C3   | C4   | 1.506(3)  |
| C3   | C2   | 1.512(3)  |
| C3   | C2A  | 1.492(12) |
| C4   | C5   | 1.381(3)  |
| C4   | C9   | 1.417(3)  |
| C5   | C6   | 1.384(3)  |
| C6   | C7   | 1.374(3)  |
| C7   | C8   | 1.383(3)  |
| C8   | C9   | 1.399(3)  |
| C10  | C11  | 1.518(3)  |
| C11  | C12  | 1.508(3)  |

**Table S9.** Bond Angles in ° for (*S*)-(+)-**2c**.

| Atom | Atom | Atom | Angle/°    |
|------|------|------|------------|
| C9   | N1   | C1   | 120.14(15) |
| C9   | N1   | C10  | 121.56(15) |
| C10  | N1   | C1   | 115.52(16) |
| O2   | N2   | C7   | 118.3(2)   |
| O3   | N2   | O2   | 122.6(2)   |
| O3   | N2   | C7   | 119.10(18) |
| N1   | C1   | C2   | 111.82(18) |
| N1   | C1   | C2A  | 118.4(12)  |
| C4   | C3   | C2   | 110.55(16) |
| C2A  | C3   | C4   | 115.1(12)  |
| C5   | C4   | C3   | 120.37(18) |
| C5   | C4   | C9   | 119.73(18) |
| C9   | C4   | C3   | 119.90(18) |
| C4   | C5   | C6   | 122.38(19) |
| C7   | C6   | C5   | 117.02(19) |
| C6   | C7   | N2   | 118.34(18) |
| C6   | C7   | C8   | 123.15(18) |
| C8   | C7   | N2   | 118.50(19) |
| C7   | C8   | C9   | 119.62(17) |
| N1   | C9   | C4   | 120.62(16) |
| N1   | C9   | C8   | 121.38(16) |
| C8   | C9   | C4   | 117.99(16) |
| N1   | C10  | C11  | 114.01(17) |
| O1   | C11  | C10  | 110.85(15) |
| O1   | C11  | C12  | 106.77(16) |
| C12  | C11  | C10  | 110.98(19) |
| C1   | C2   | C3   | 109.57(19) |
| C3   | C2A  | C1   | 110.8(10)  |

**Table S10.** Torsion Angles in ° for (*S*)-(+)-**2c**.

| Atom | Atom | Atom | Atom | Angle/°     |
|------|------|------|------|-------------|
| O2   | N2   | C7   | C6   | 2.8(3)      |
| O2   | N2   | C7   | C8   | -177.9(2)   |
| O3   | N2   | C7   | C6   | -176.4(2)   |
| O3   | N2   | C7   | C8   | 2.9(3)      |
| N1   | C1   | C2   | C3   | 57.4(2)     |
| N1   | C1   | C2A  | C3   | -41(3)      |
| N1   | C10  | C11  | O1   | 61.1(2)     |
| N1   | C10  | C11  | C12  | 179.59(17)  |
| N2   | C7   | C8   | C9   | -177.57(17) |
| C1   | N1   | C9   | C4   | 8.2(3)      |
| C1   | N1   | C9   | C8   | -173.15(18) |
| C1   | N1   | C10  | C11  | -103.4(2)   |
| C3   | C4   | C5   | C6   | -176.5(2)   |
| C3   | C4   | C9   | N1   | -5.1(3)     |
| C3   | C4   | C9   | C8   | 176.19(18)  |
| C4   | C3   | C2   | C1   | -53.5(3)    |
| C4   | C3   | C2A  | C1   | 42(3)       |
| C4   | C5   | C6   | C7   | -0.4(3)     |
| C5   | C4   | C9   | N1   | 175.21(18)  |
| C5   | C4   | C9   | C8   | -3.5(3)     |
| C5   | C6   | C7   | N2   | 177.20(19)  |
| C5   | C6   | C7   | C8   | -2.1(3)     |
| C6   | C7   | C8   | C9   | 1.7(3)      |
| C7   | C8   | C9   | N1   | -177.56(18) |
| C7   | C8   | C9   | C4   | 1.1(3)      |
| C9   | N1   | C1   | C2   | -34.9(3)    |
| C9   | N1   | C1   | C2A  | 16.0(16)    |
| C9   | N1   | C10  | C11  | 95.5(2)     |
| C9   | C4   | C5   | C6   | 3.2(3)      |
| C10  | N1   | C1   | C2   | 163.67(18)  |
| C10  | N1   | C1   | C2A  | -145.4(15)  |
| C10  | N1   | C9   | C4   | 168.47(17)  |
| C10  | N1   | C9   | C8   | -12.9(3)    |
| C2   | C3   | C4   | C5   | -151.9(2)   |
| C2   | C3   | C4   | C9   | 28.4(3)     |
| C2A  | C3   | C4   | C5   | 158.0(14)   |
| C2A  | C3   | C4   | C9   | -21.7(15)   |

## HPLC of *rac*-2a on Chiralcel OJ-H at 30 °C

Conditions: *n*-hexane-2-PrOH (90:10, v/v); f=0.8 mL/min;  $\lambda$ =260 nm; *p*=3.6 MPa

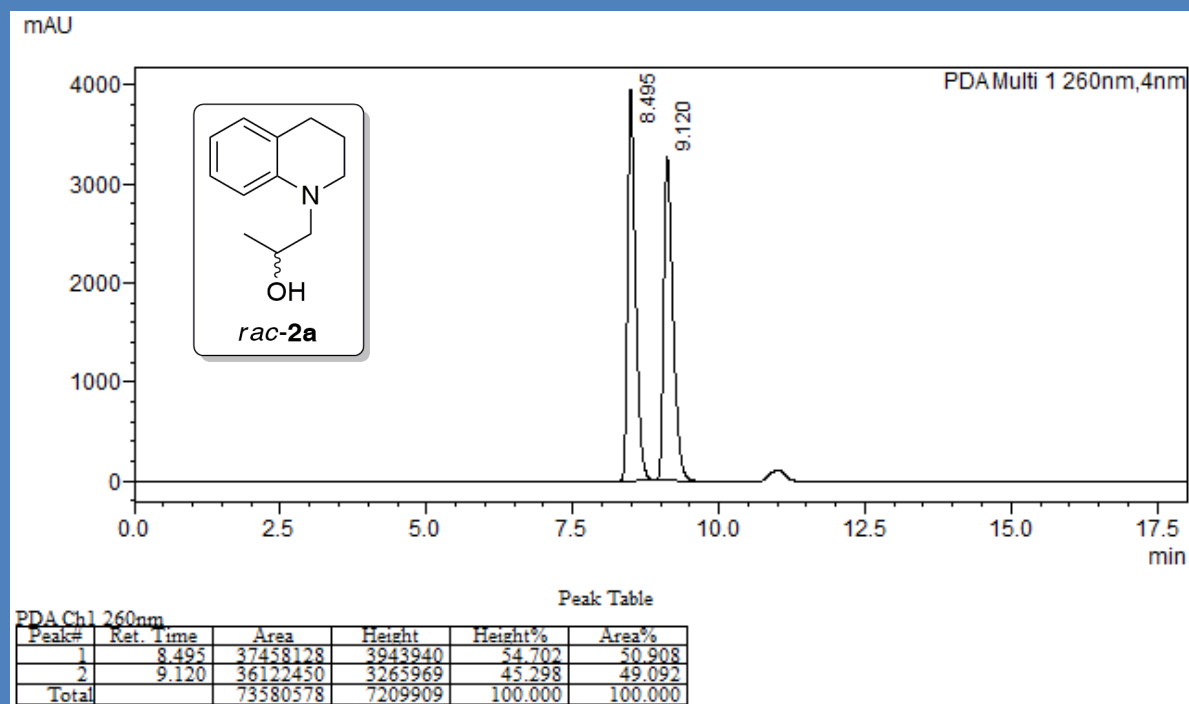

## HPLC of (*S*)-(+)-2a after lipase-catalyzed KR of *rac*-2a on Chiralcel OJ-H at 30 °C

Conditions: *n*-hexane-2-PrOH (90:10, v/v); f=0.8 mL/min;  $\lambda$ =260 nm; *p*=3.6 MPa

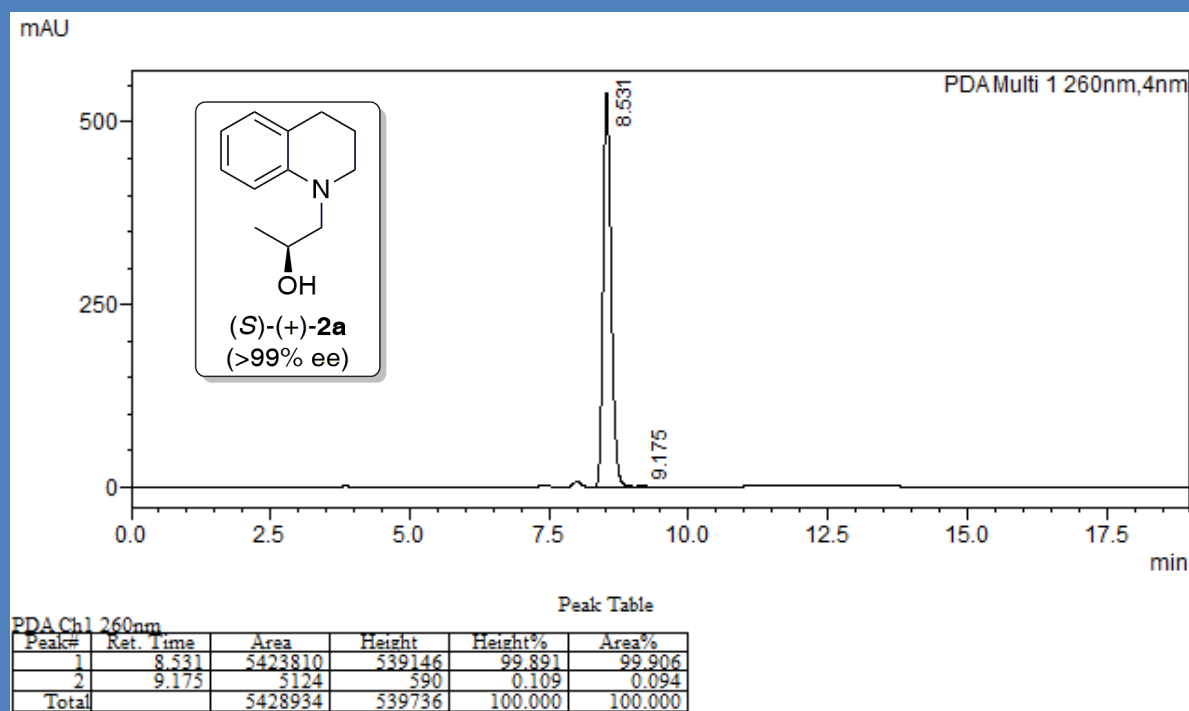

# HPLC of (*R*)-(-)-2a after K<sub>2</sub>CO<sub>3</sub>-catalyzed hydrolysis of (*R*)-(+)-3a on Chiralcel OJ-H at 30 °C

Conditions: *n*-hexane-2-PrOH (90:10, v/v); f=0.8 mL/min; λ=260 nm; p=3.6 MPa

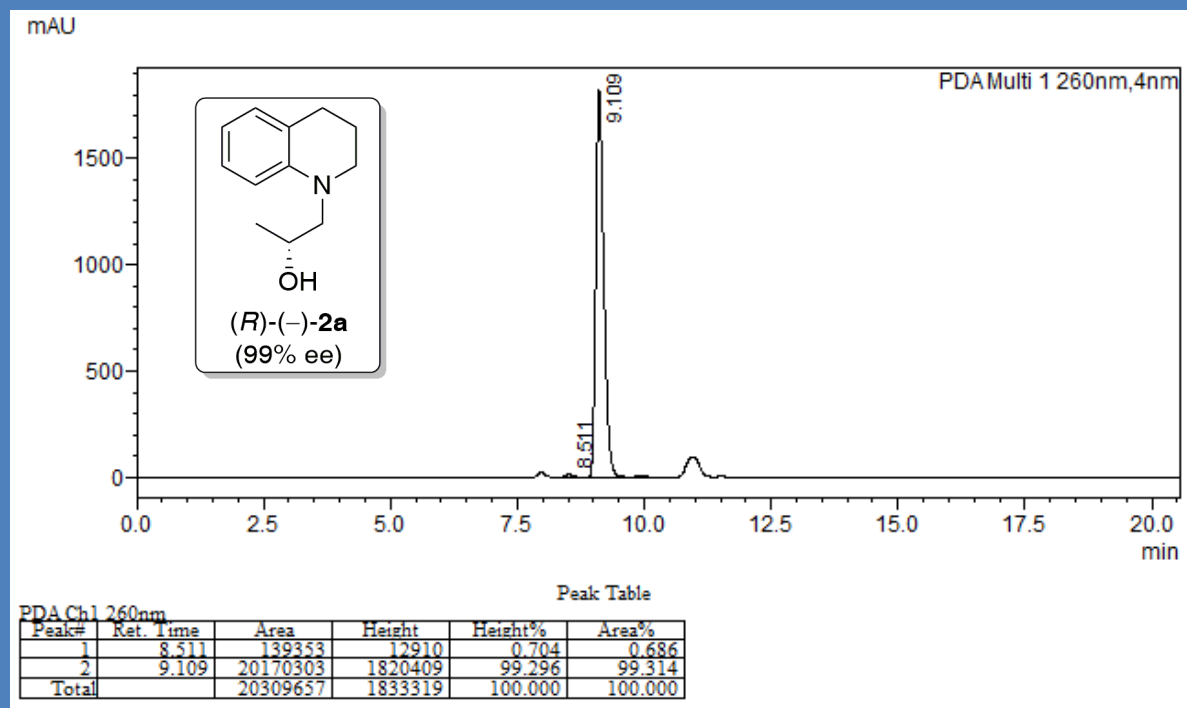

# HPLC of (*R*)-(-)-2a obtained using (*R*)-(+)-propylene oxide on Chiralcel OJ-H at 30 °C

Conditions: *n*-hexane-2-PrOH (90:10, v/v); f=0.8 mL/min; λ=260 nm; p=3.6 MPa

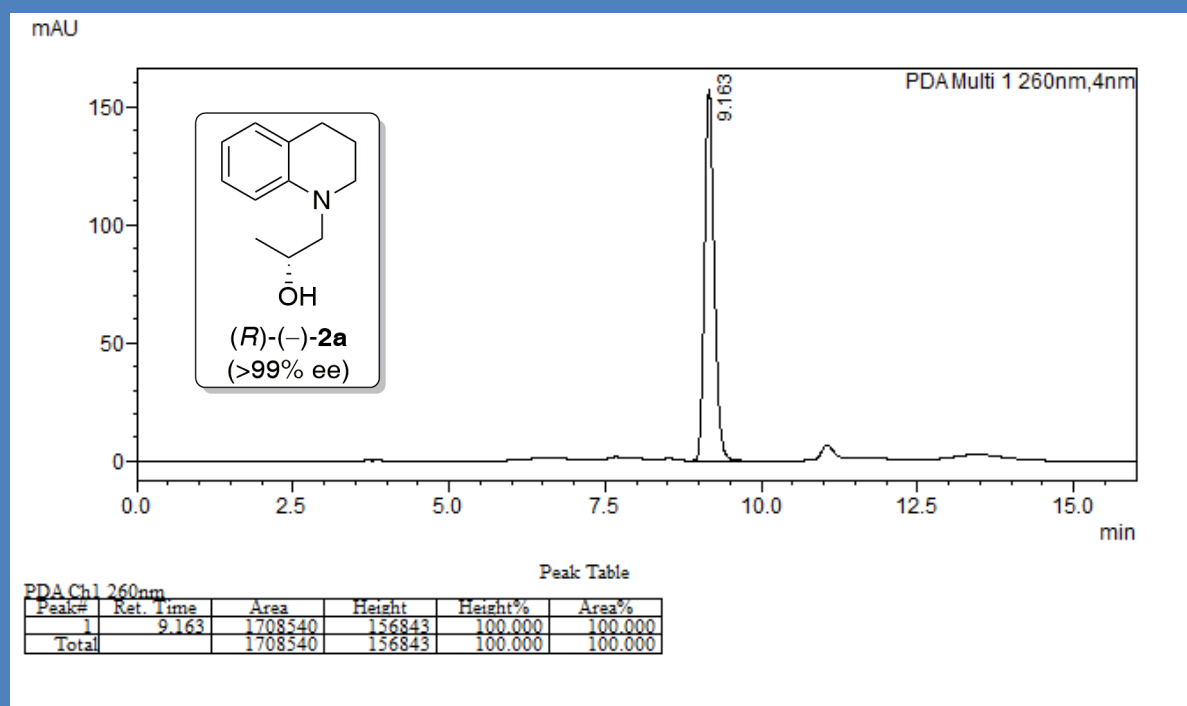

## HPLC of *rac*-3a on Chiralcel OJ-H at 30 °C

Conditions: *n*-hexane-2-PrOH (90:10, v/v); *f*=0.8 mL/min;  $\lambda$ =260 nm; *p*=3.6 MPa

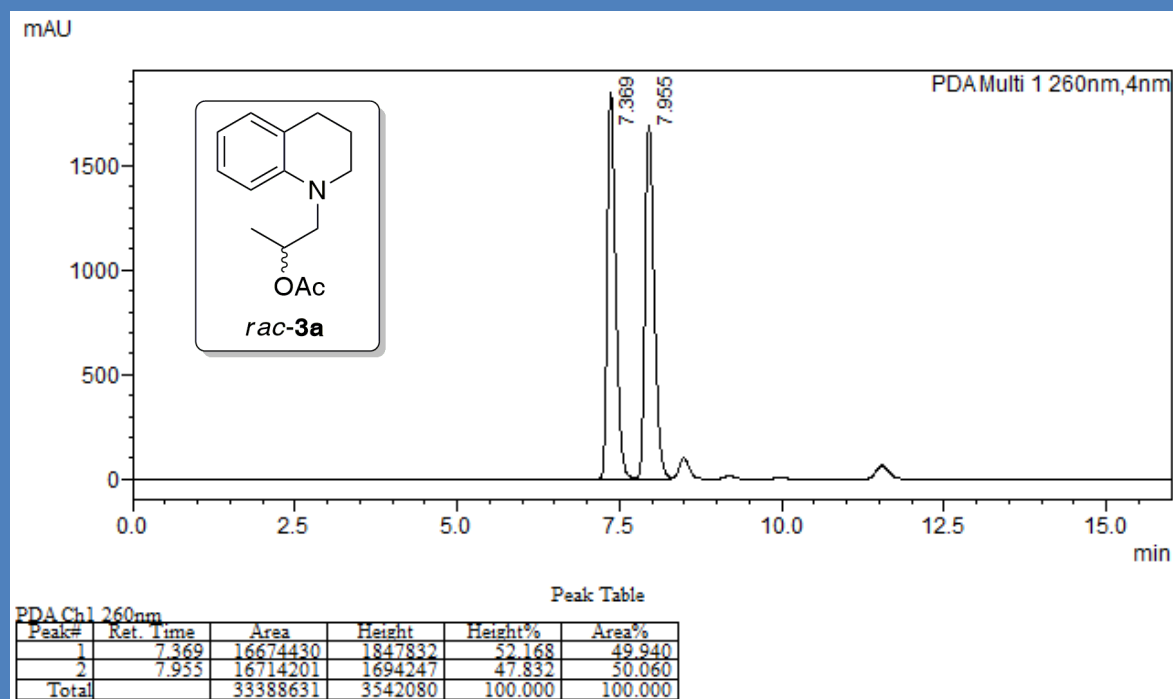

## HPLC of (*R*)-(+)-3a after lipase-catalyzed KR of *rac*-2a on Chiralcel OJ-H at 30 °C

Conditions: *n*-hexane-2-PrOH (90:10, v/v); *f*=0.8 mL/min;  $\lambda$ =260 nm; *p*=3.6 MPa

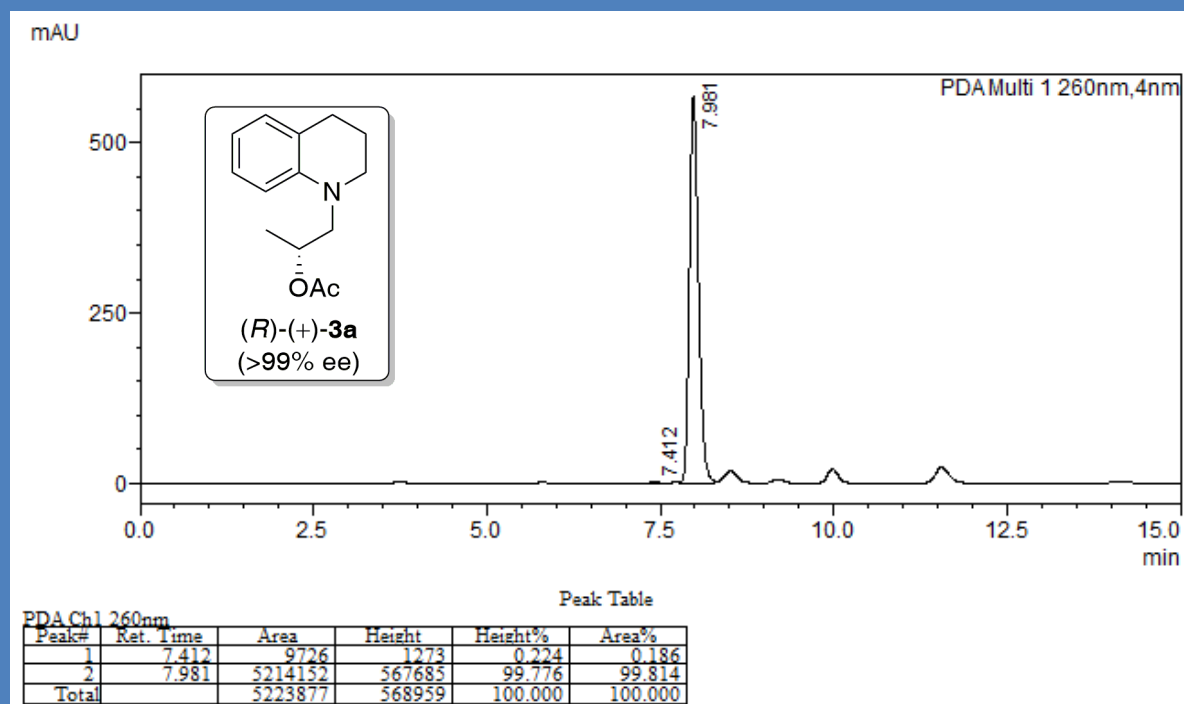

## HPLC of *rac*-2b on Chiralcel OJ-H at 30 °C

Conditions: *n*-hexane-2-PrOH (97:3, v/v); *f*=0.8 mL/min;  $\lambda$ =260 nm; *p*=3.4 MPa

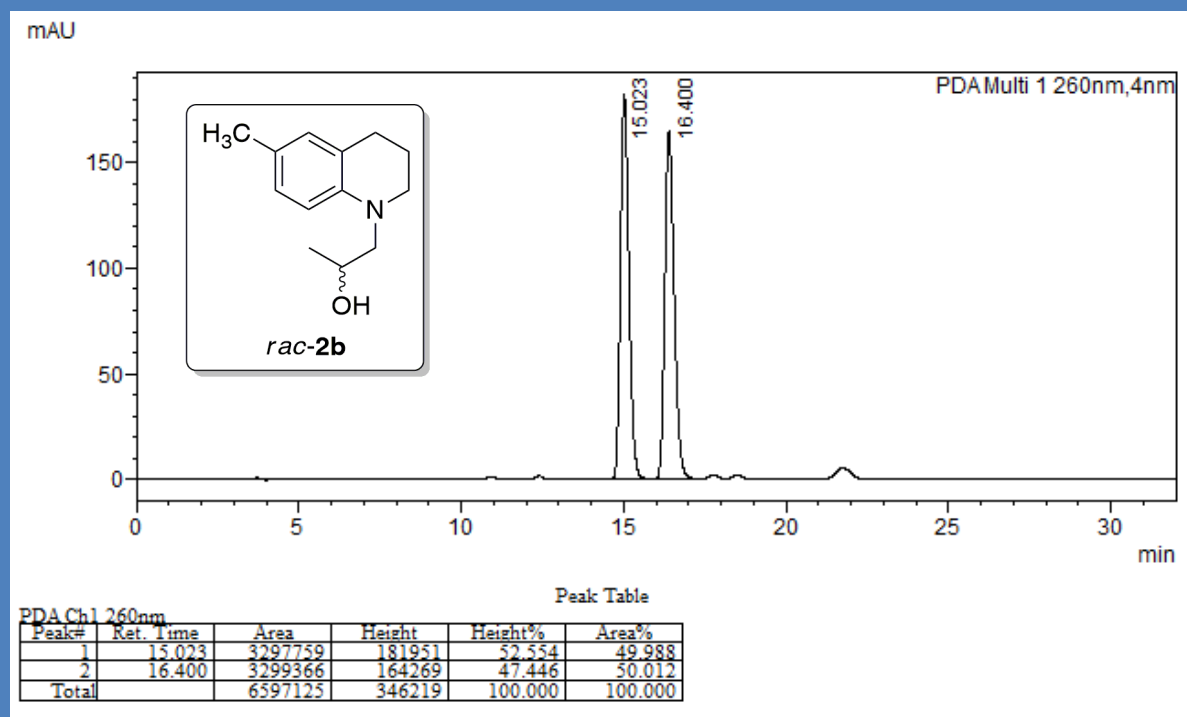

## HPLC of (*S*)-(+)-2b after lipase-catalyzed KR of *rac*-2b on Chiralcel OJ-H at 30 °C

Conditions: *n*-hexane-2-PrOH (97:3, v/v); *f*=0.8 mL/min;  $\lambda$ =260 nm; *p*=3.4 MPa

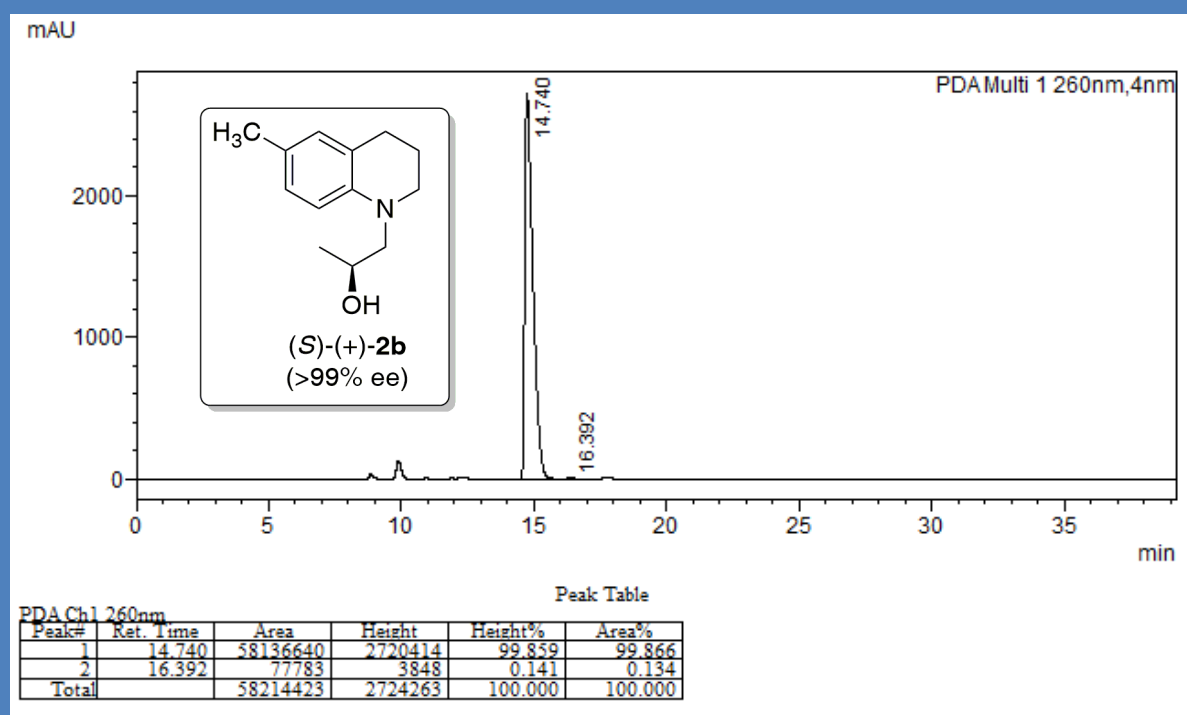

# HPLC of (*R*)-(-)-2b after K<sub>2</sub>CO<sub>3</sub>-catalyzed hydrolysis of (*R*)-(+)-3b on Chiralcel OJ-H at 30 °C

Conditions: *n*-hexane-2-PrOH (97:3, v/v); f=0.8 mL/min; λ=260 nm; p=3.4 MPa

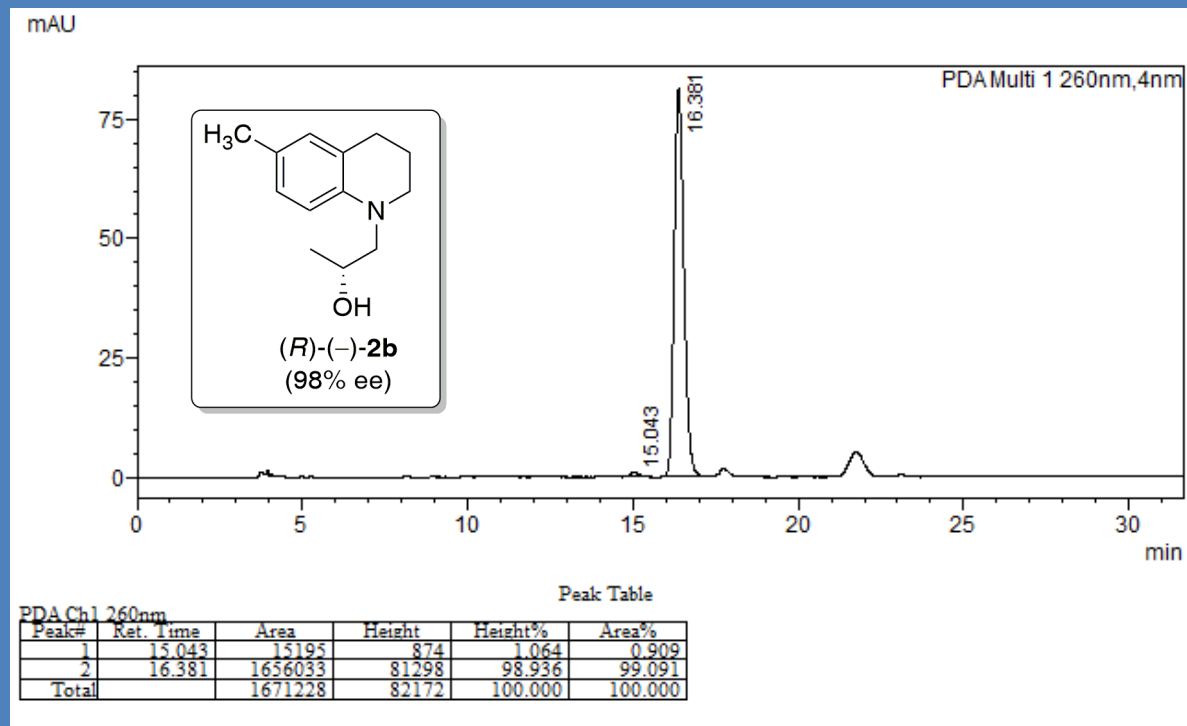

# HPLC of (*R*)-(-)-2b obtained using (*R*)-(+)-propylene oxide on Chiralcel OJ-H at 30 °C

Conditions: *n*-hexane-2-PrOH (97:3, v/v); f=0.8 mL/min; λ=260 nm; p=3.4 MPa

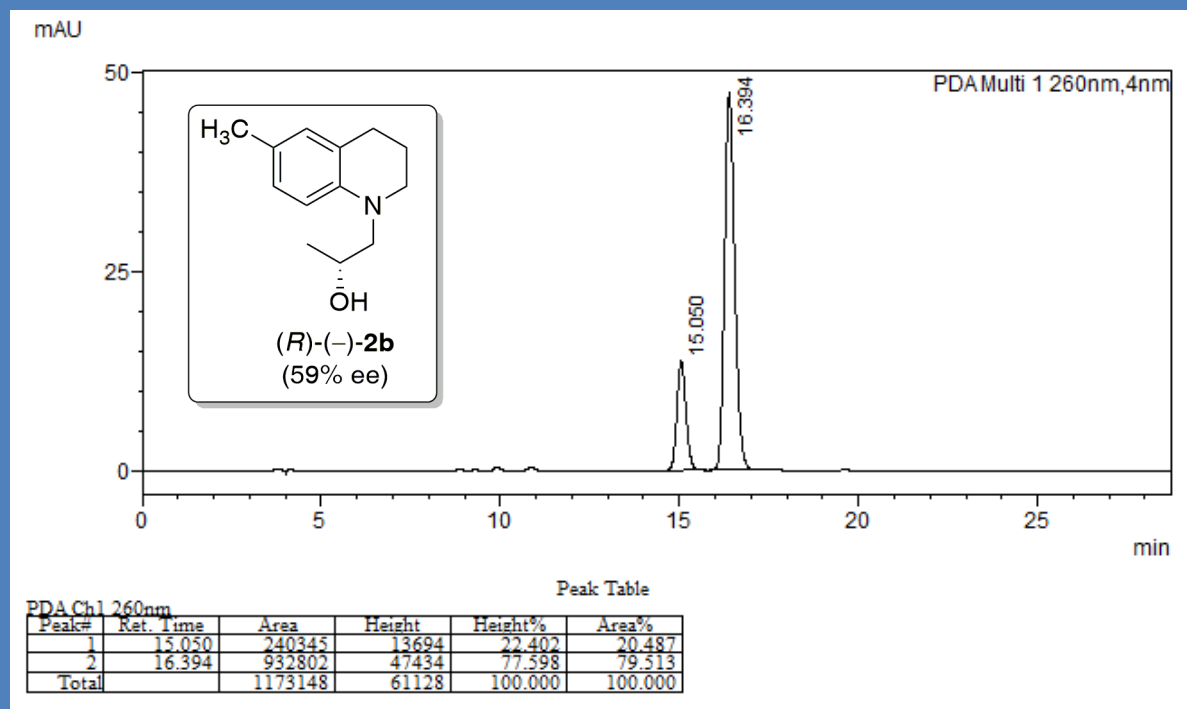

## HPLC of *rac*-3b on Chiralcel OJ-H at 30 °C

Conditions: *n*-hexane-2-PrOH (97:3, v/v); *f*=0.8 mL/min;  $\lambda$ =260 nm; *p*=3.4 MPa

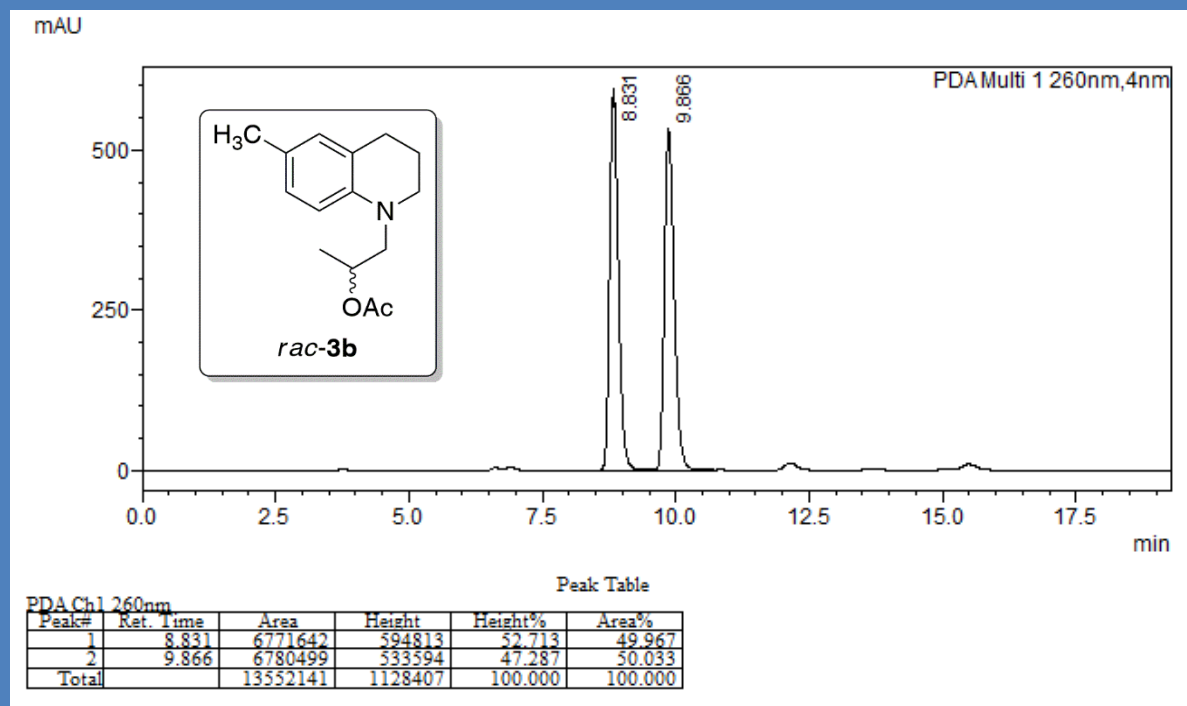

## HPLC of (*R*)-(+)-3b after lipase-catalyzed KR of *rac*-2b on Chiralcel OJ-H at 30 °C

Conditions: *n*-hexane-2-PrOH (97:3, v/v); *f*=0.8 mL/min;  $\lambda$ =260 nm; *p*=3.4 MPa

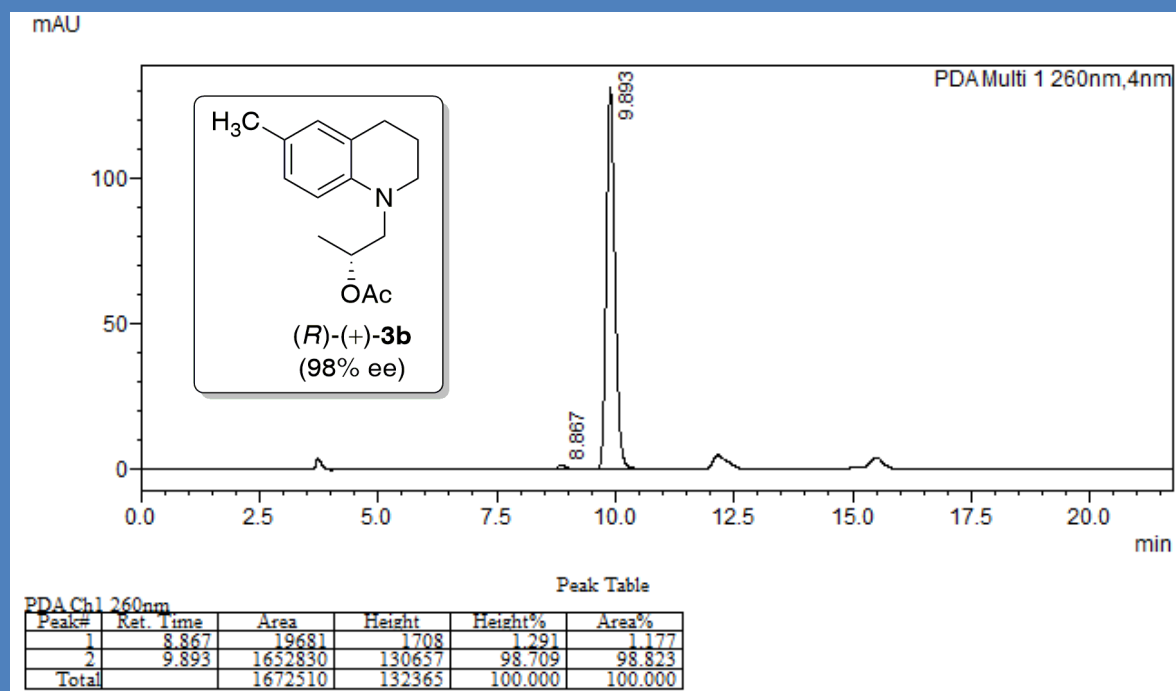



# HPLC of *rac*-2c on Chiralcel OD-H at 30 °C

Conditions: *n*-hexane-2-PrOH (98:2, v/v); *f*=0.8 mL/min;  $\lambda$ =260 nm; *p*=3.5 MPa

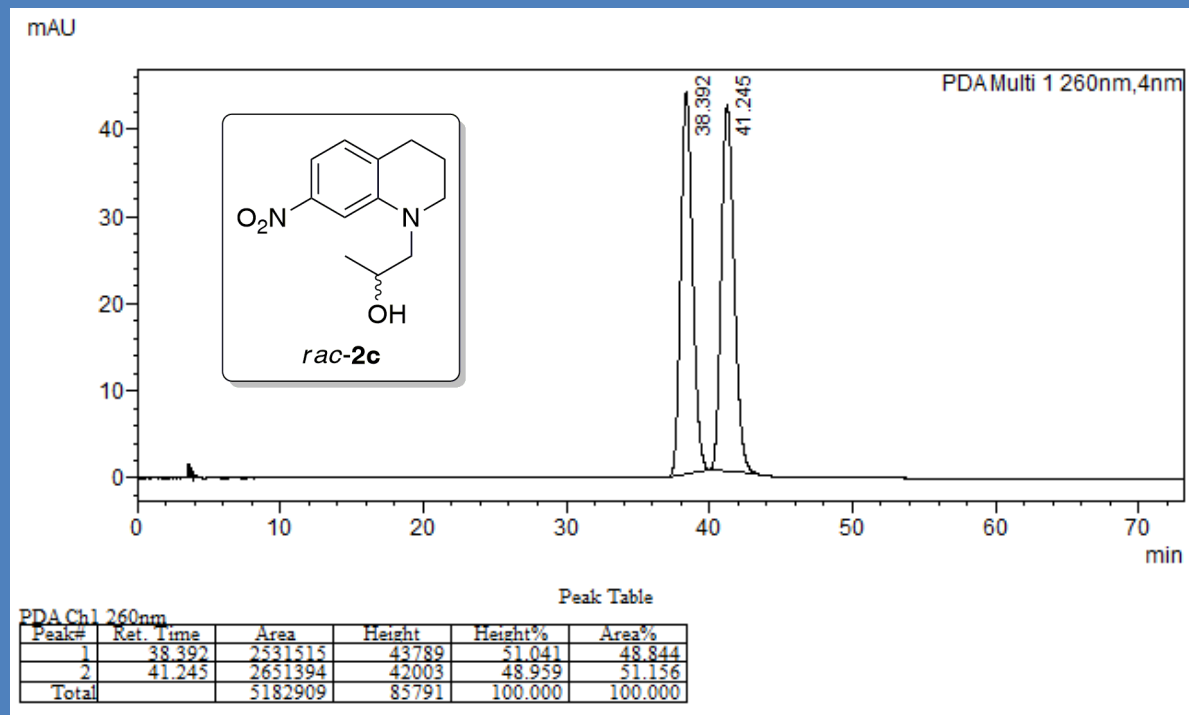

# HPLC of (*S*)-(+)-2c after lipase-catalyzed KR of *rac*-2c on Chiralcel OD-H at 30 °C

Conditions: *n*-hexane-2-PrOH (98:2, v/v); *f*=0.8 mL/min;  $\lambda$ =260 nm; *p*=3.5 MPa

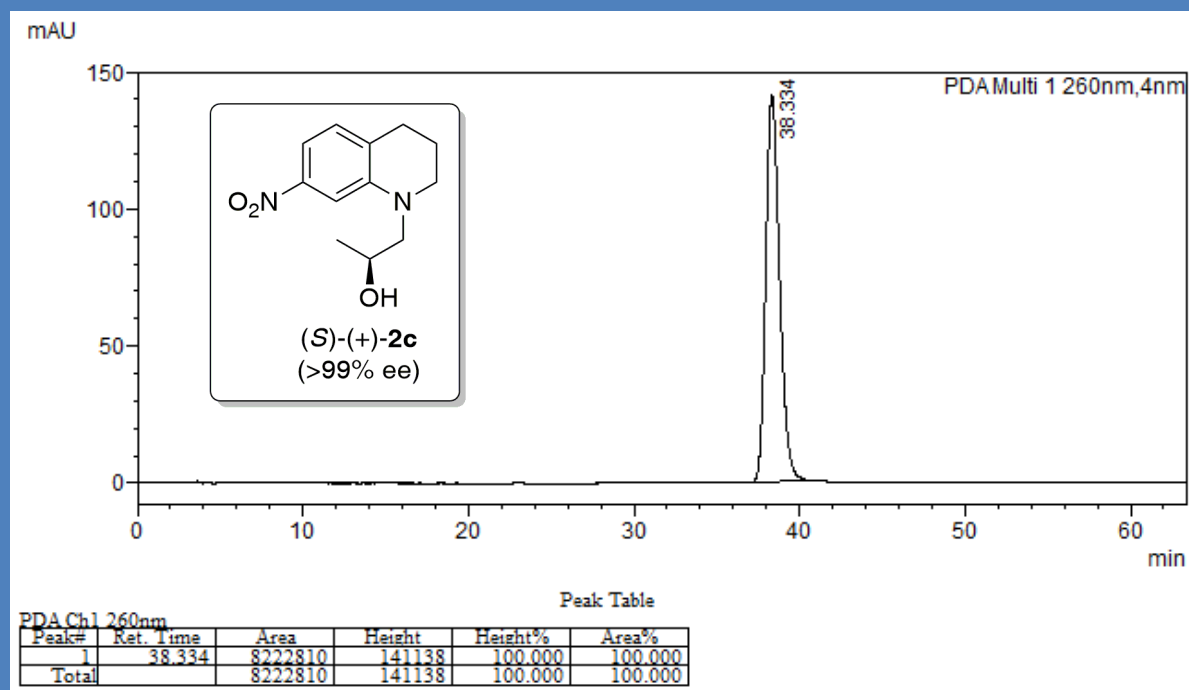

## HPLC of (*R*)-(-)-2c after K<sub>2</sub>CO<sub>3</sub>-catalyzed hydrolysis of (*R*)-(+)-3c on Chiralcel OD-H at 30 °C

Conditions: *n*-hexane-2-PrOH (98:2, v/v); f=0.8 mL/min; λ=260 nm; p=3.5 MPa

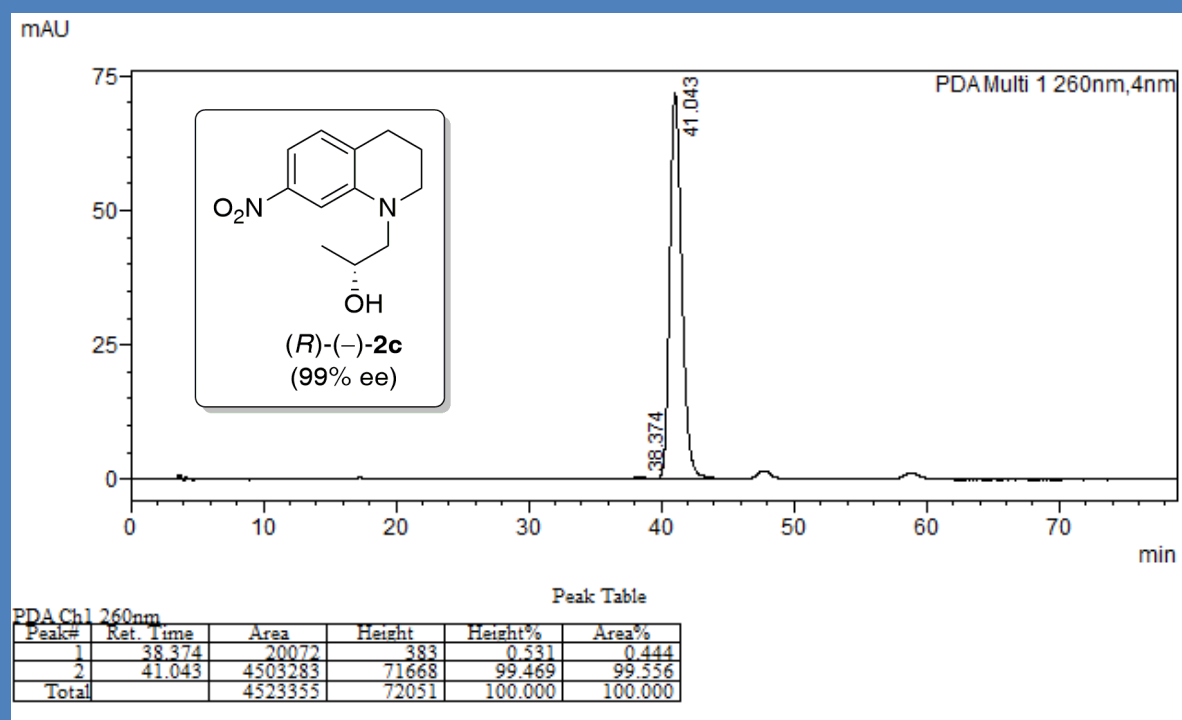

## HPLC of (*R*)-(-)-2c obtained using (*R*)-(+)-propylene oxide on Chiralcel OD-H at 30 °C

Conditions: *n*-hexane-2-PrOH (98:2, v/v); f=0.8 mL/min; λ=260 nm; p=3.5 MPa

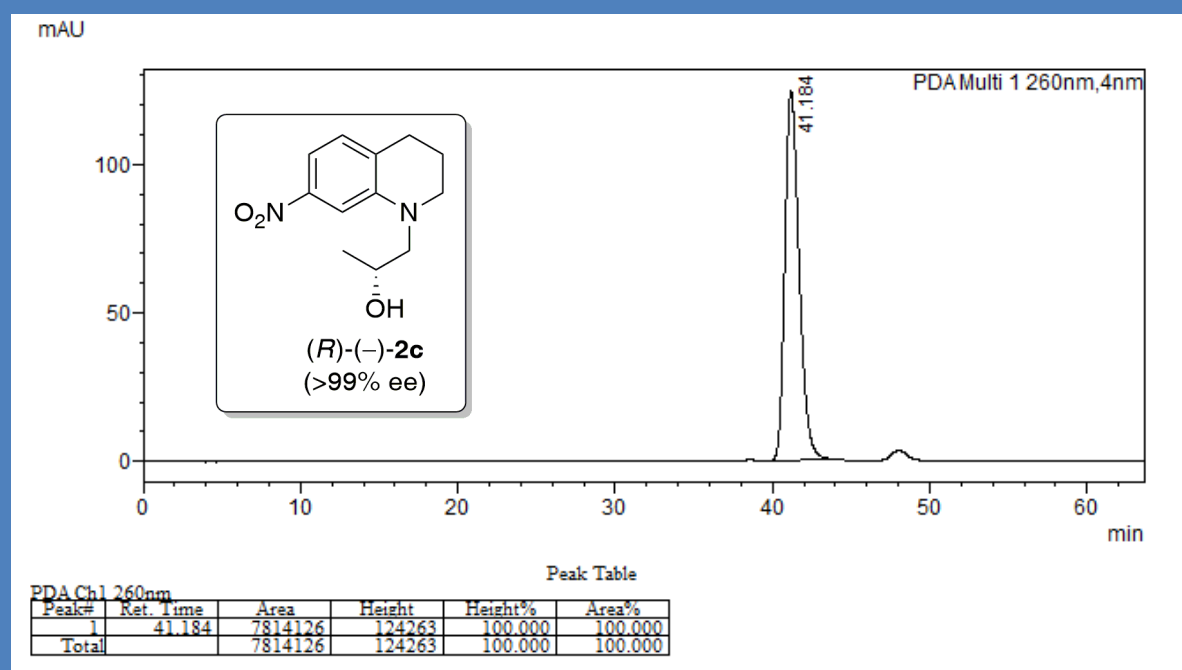

## HPLC of *rac*-3c on Chiralcel OD-H at 30 °C

Conditions: *n*-hexane-2-PrOH (99:1, v/v); *f*=0.7 mL/min;  $\lambda$ =260 nm; *p*=3.0 MPa

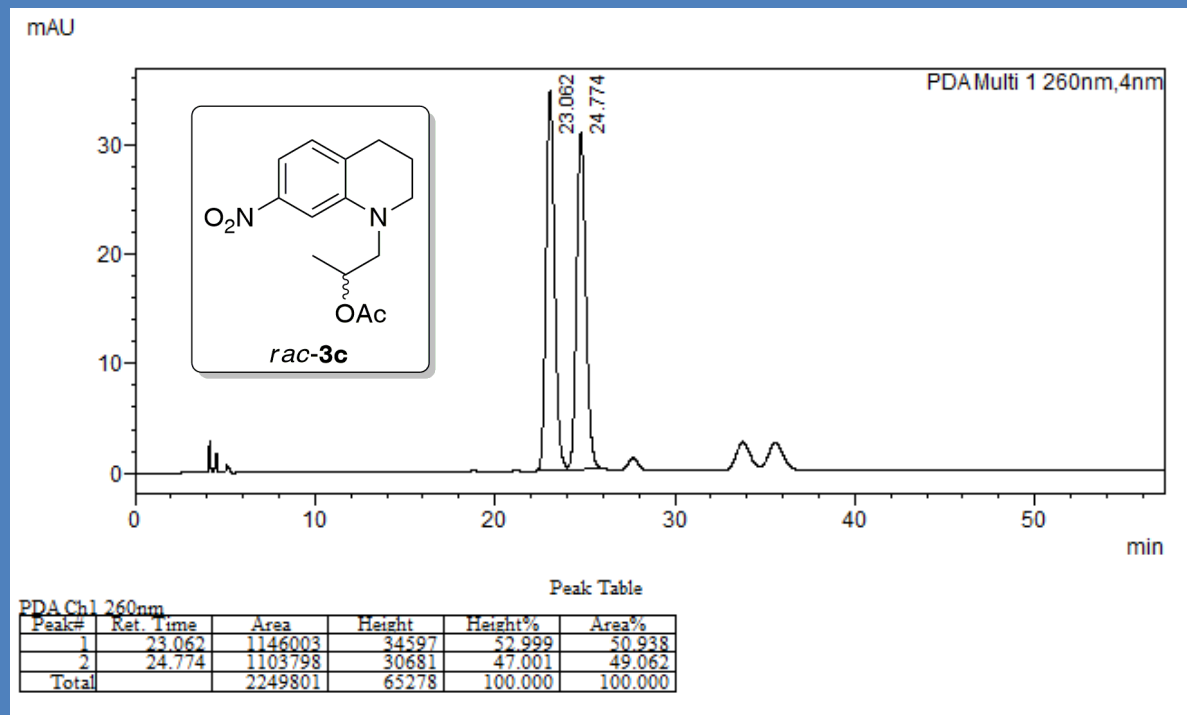

## HPLC of (*R*)-(+)-3c after lipase-catalyzed KR of *rac*-2c on Chiralcel OD-H at 30 °C

Conditions: *n*-hexane-2-PrOH (99:1, v/v); *f*=0.7 mL/min;  $\lambda$ =260 nm; *p*=3.0 MPa

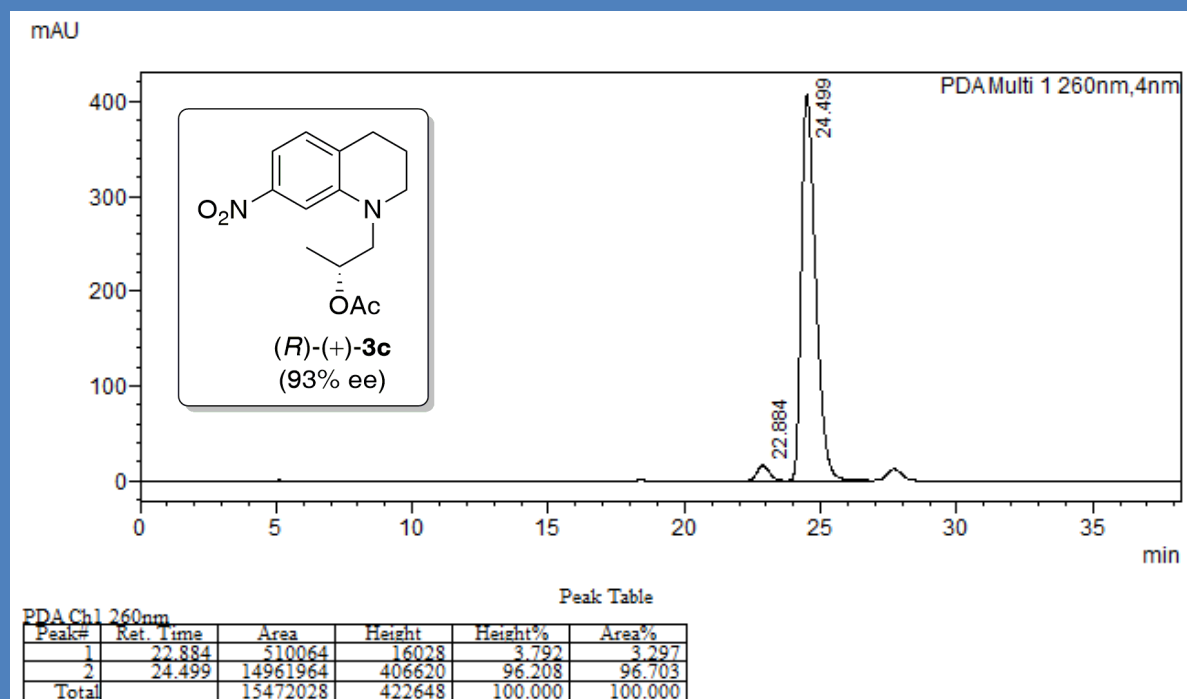

## HPLC analysis for the subsequent biocatalytic reaction:

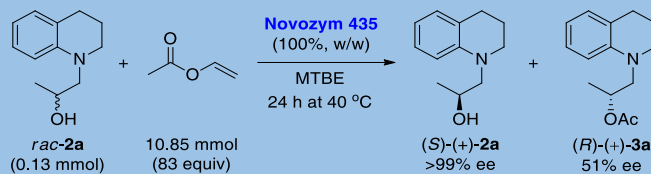

HPLC conditions [for (*S*)-**2a**]: *n*-hexane-*i*-PrOH (90:10, v/v); *f*=0.8 mL/min;  $\lambda$ =260 nm; Chiralcel OJ-H

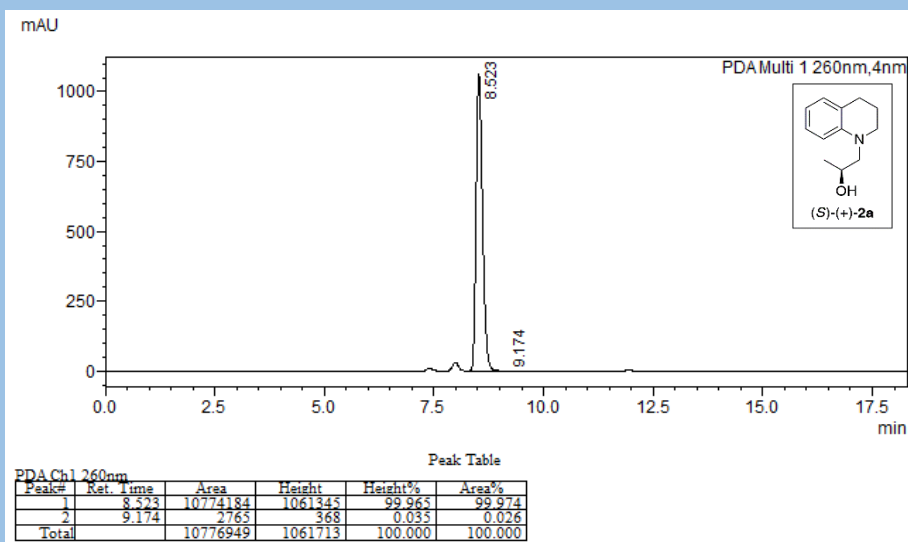

HPLC conditions [for (*R*)-**3a**]: *n*-hexane-*i*-PrOH (90:10, v/v); *f*=0.8 mL/min;  $\lambda$ =260 nm; Chiralcel OJ-H

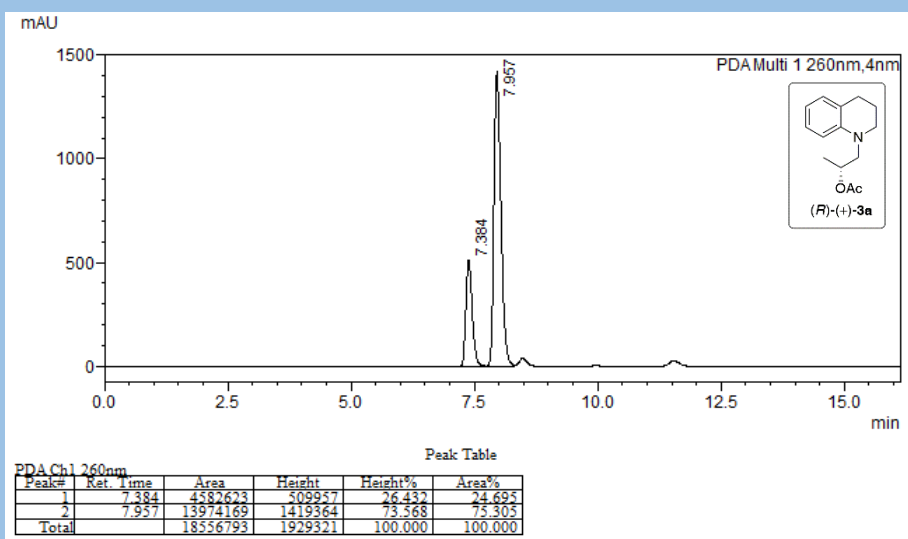

## HPLC analysis for the subsequent biocatalytic reaction:

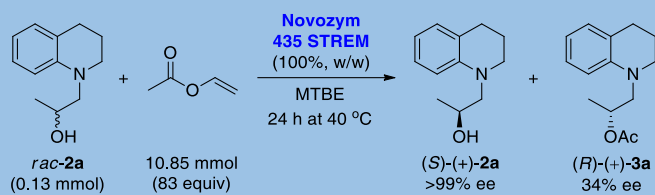

HPLC conditions [for (*S*)-**2a**]: *n*-hexane-*i*-PrOH (90:10, v/v); *f*=0.8 mL/min;  $\lambda$ =260 nm; Chiralcel OJ-H

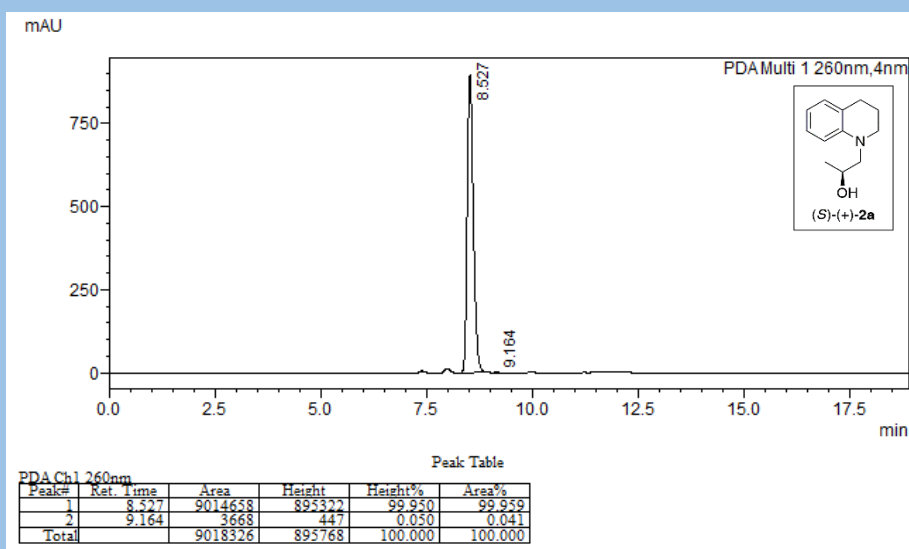

HPLC conditions [for (*R*)-**3a**]: *n*-hexane-*i*-PrOH (90:10, v/v); *f*=0.8 mL/min;  $\lambda$ =260 nm; Chiralcel OJ-H

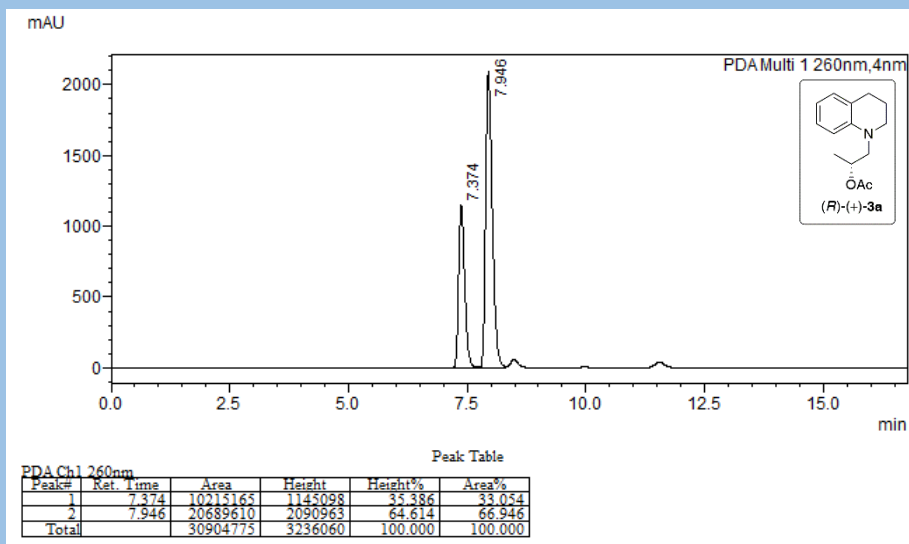

## HPLC analysis for the subsequent biocatalytic reaction:

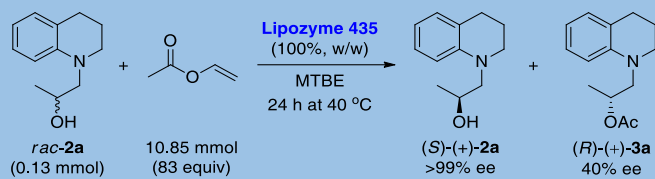

HPLC conditions [for (*S*)-**2a**]: *n*-hexane-*i*-PrOH (90:10, v/v); f=0.8 mL/min; λ=260 nm; Chiralcel OJ-H

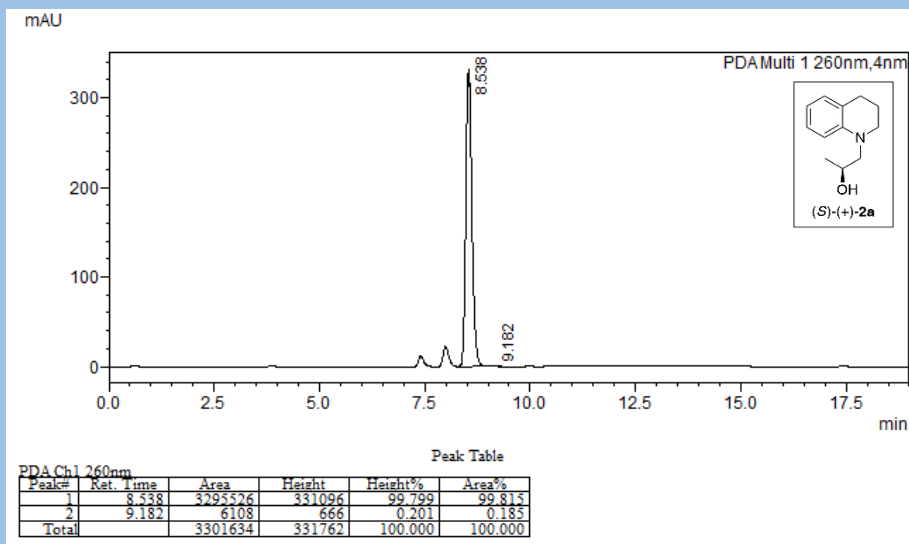

HPLC conditions [for (*R*)-**3a**]: *n*-hexane-*i*-PrOH (90:10, v/v); f=0.8 mL/min; λ=260 nm; Chiralcel OJ-H

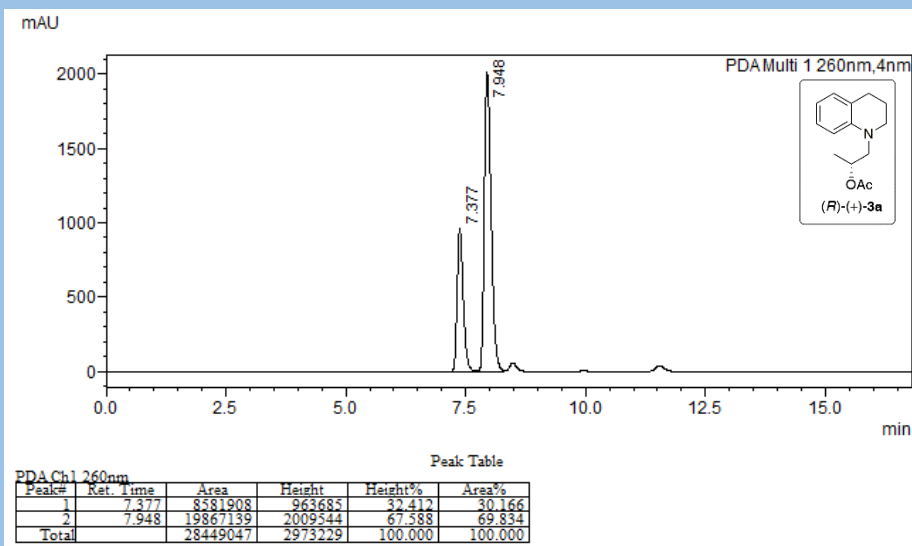

## HPLC analysis for the subsequent biocatalytic reaction:

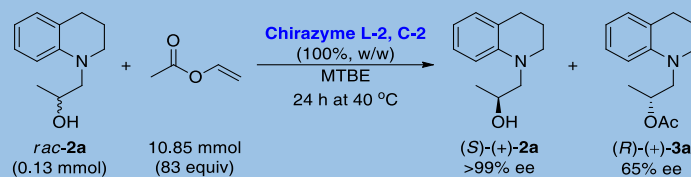

HPLC conditions [for (*S*)-2a]: *n*-hexane-*i*-PrOH (90:10, v/v); *f*=0.8 mL/min;  $\lambda$ =260 nm; Chiralcel OJ-H

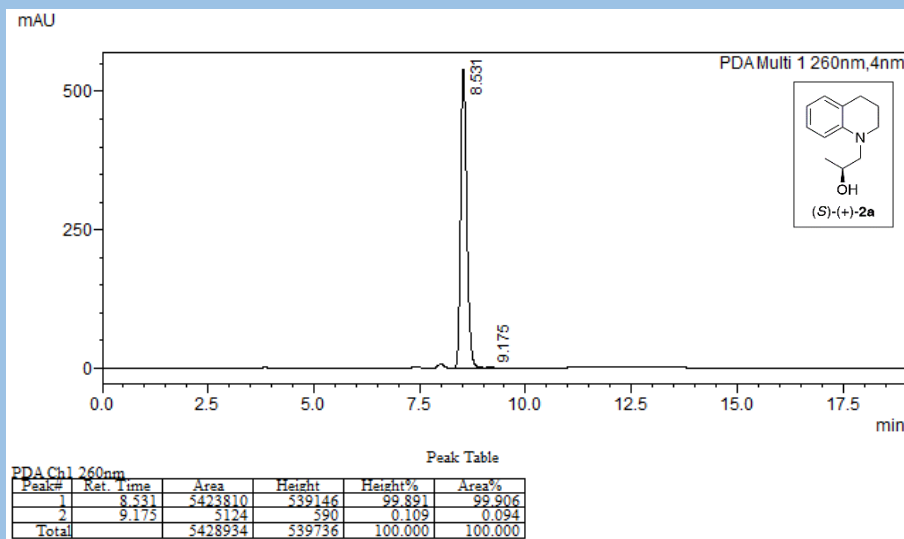

HPLC conditions [for (*R*)-3a]: *n*-hexane-*i*-PrOH (90:10, v/v); *f*=0.8 mL/min;  $\lambda$ =260 nm; Chiralcel OJ-H

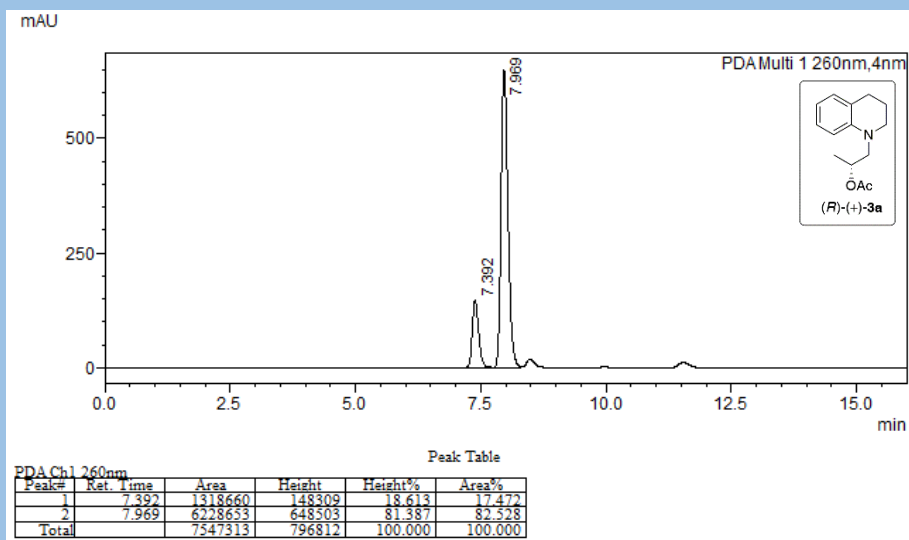

## HPLC analysis for the subsequent biocatalytic reaction:

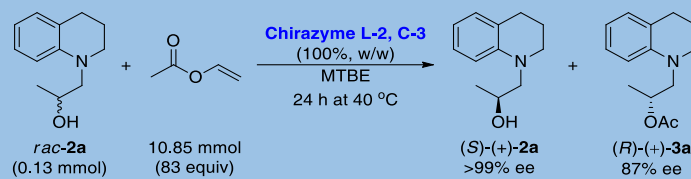

HPLC conditions [for (*S*)-**2a**]: *n*-hexane-*i*-PrOH (90:10, v/v); *f*=0.8 mL/min;  $\lambda$ =260 nm; Chiralcel OJ-H

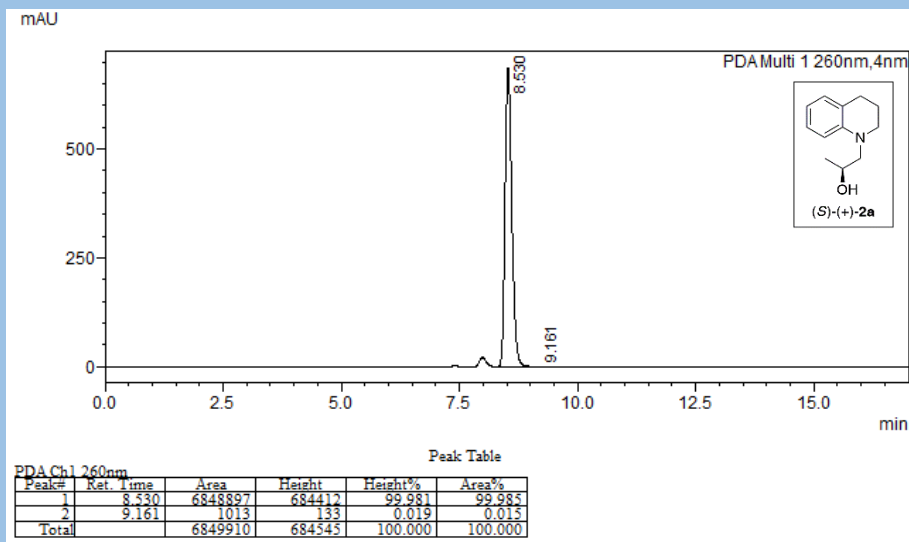

HPLC conditions [for (*R*)-**3a**]: *n*-hexane-*i*-PrOH (90:10, v/v); *f*=0.8 mL/min;  $\lambda$ =260 nm; Chiralcel OJ-H

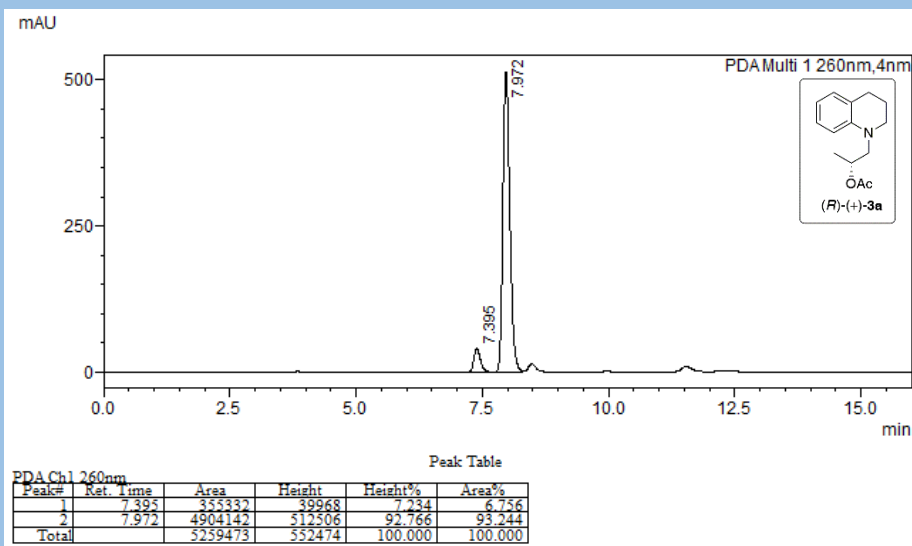



## HPLC analysis for the subsequent biocatalytic reaction:

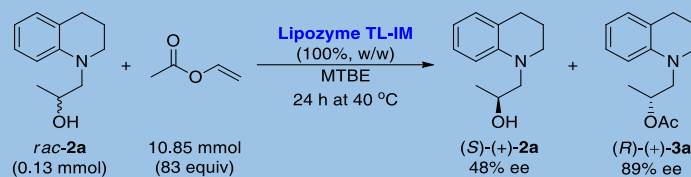

HPLC conditions [for (*S*)-**2a**]: *n*-hexane-*i*-PrOH (90:10, v/v); f=0.8 mL/min; λ=260 nm; Chiralcel OJ-H

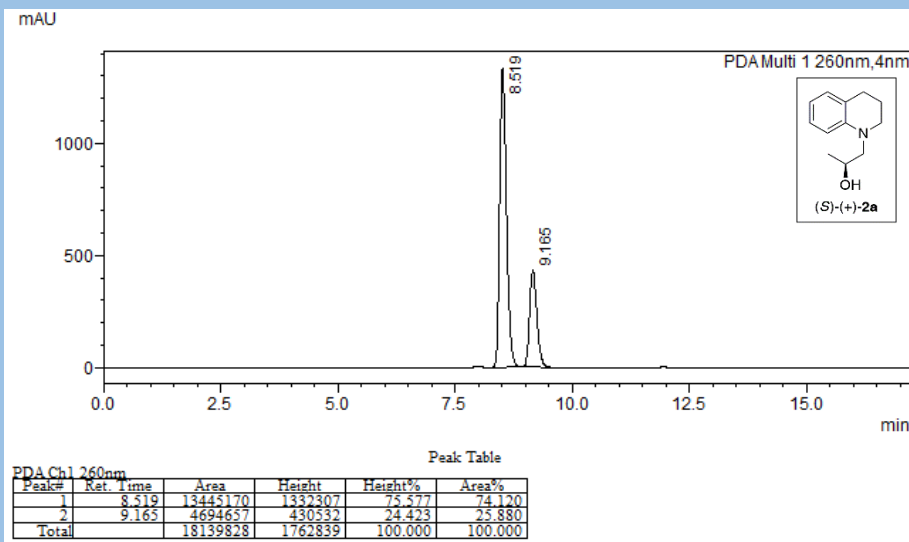

HPLC conditions [for (*R*)-**3a**]: *n*-hexane-*i*-PrOH (90:10, v/v); f=0.8 mL/min; λ=260 nm; Chiralcel OJ-H

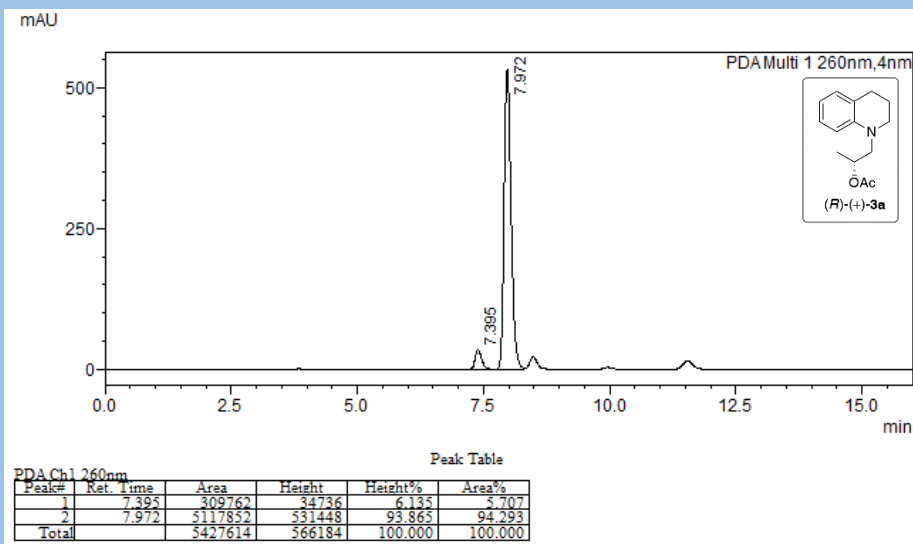

## HPLC analysis for the subsequent biocatalytic reaction:

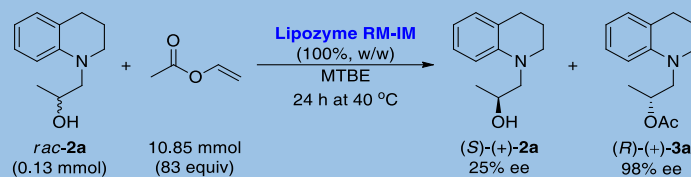

HPLC conditions [for (*S*)-2a]: *n*-hexane-*i*-PrOH (90:10, v/v); *f*=0.8 mL/min;  $\lambda$ =260 nm; Chiralcel OJ-H

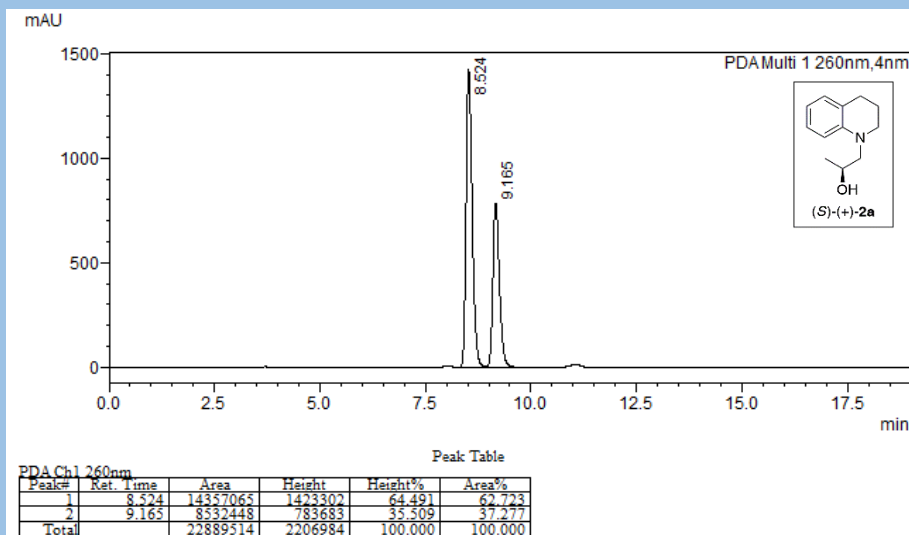

HPLC conditions [for (*R*)-3a]: *n*-hexane-*i*-PrOH (90:10, v/v); *f*=0.8 mL/min;  $\lambda$ =260 nm; Chiralcel OJ-H

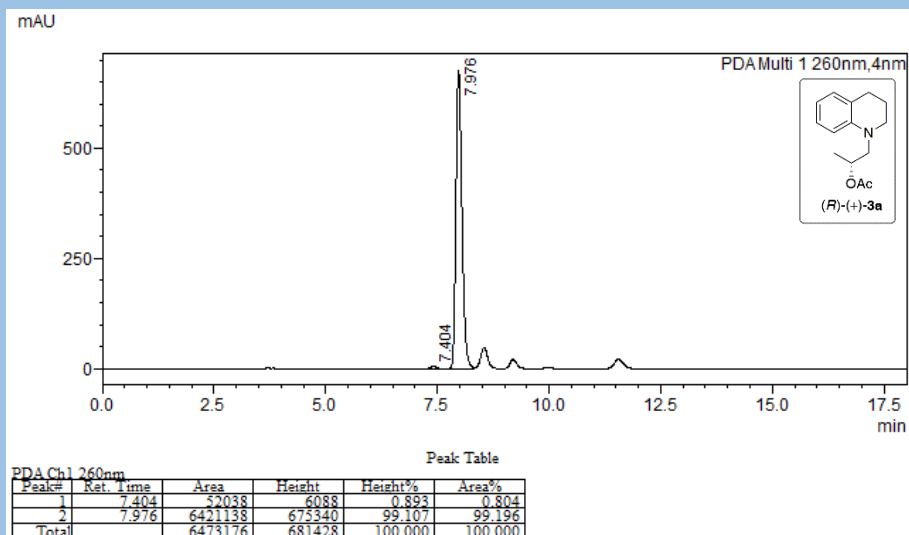

## HPLC analysis for the subsequent biocatalytic reaction:

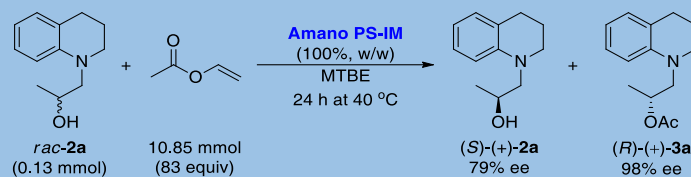

HPLC conditions [for (*S*)-**2a**]: *n*-hexane-*i*-PrOH (90:10, v/v); *f*=0.8 mL/min;  $\lambda$ =260 nm; Chiralcel OJ-H

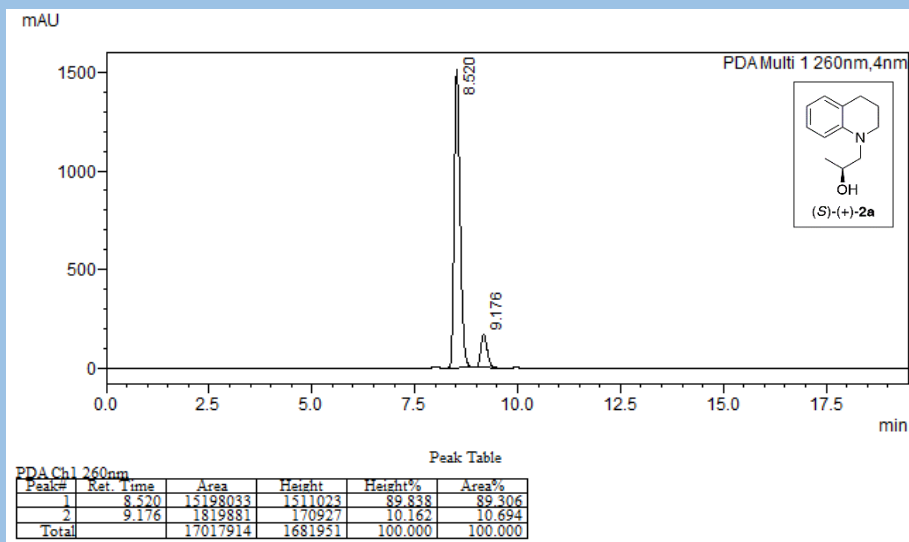

HPLC conditions [for (*R*)-**3a**]: *n*-hexane-*i*-PrOH (90:10, v/v); *f*=0.8 mL/min;  $\lambda$ =260 nm; Chiralcel OJ-H

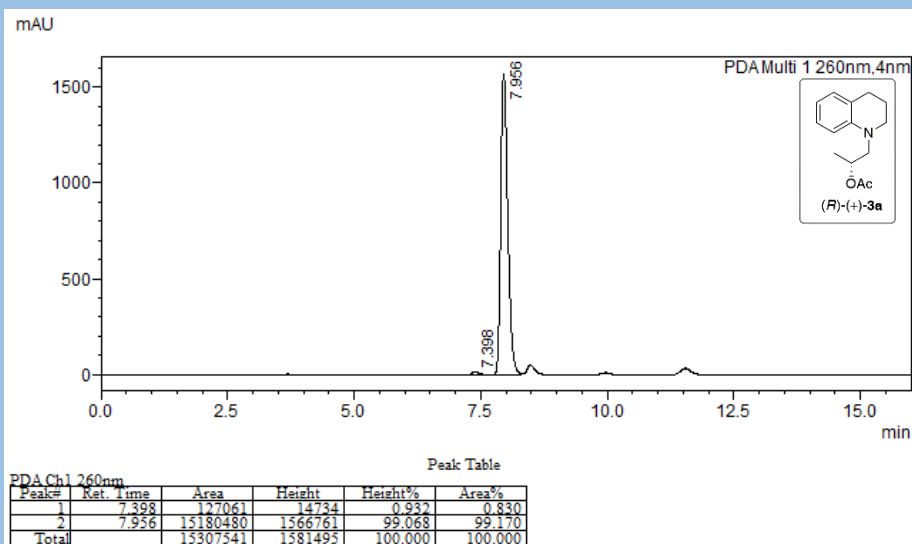

## HPLC analysis for the subsequent biocatalytic reaction:

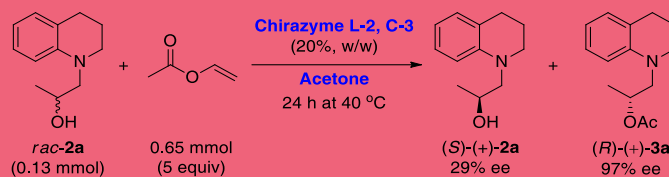

HPLC conditions [for (*S*)-**2a**]: *n*-hexane-*i*-PrOH (90:10, v/v); *f*=0.8 mL/min;  $\lambda$ =260 nm; Chiralcel OJ-H

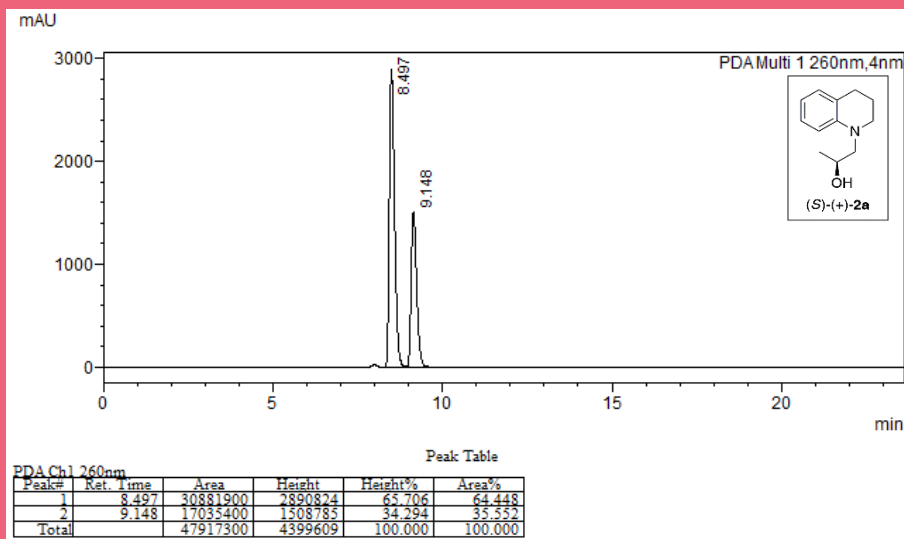

HPLC conditions [for (*R*)-**3a**]: *n*-hexane-*i*-PrOH (90:10, v/v); *f*=0.8 mL/min;  $\lambda$ =260 nm; Chiralcel OJ-H

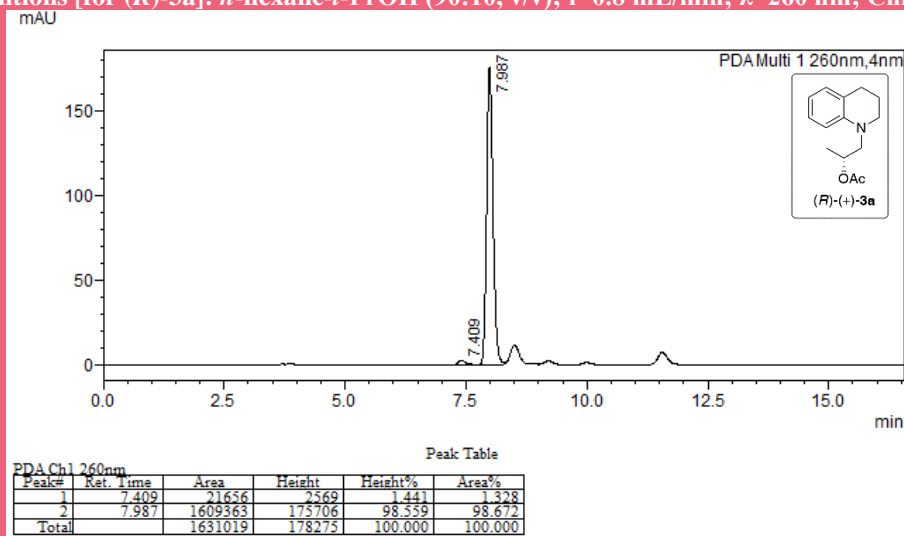

## HPLC analysis for the subsequent biocatalytic reaction:

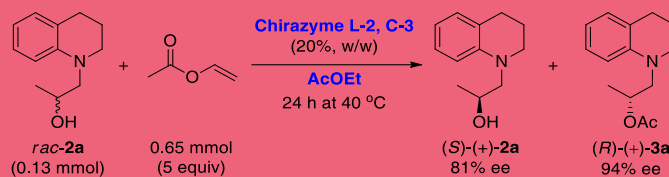

HPLC conditions [for (*S*)-**2a**]: *n*-hexane-*i*-PrOH (90:10, v/v); *f*=0.8 mL/min;  $\lambda$ =260 nm; Chiralcel OJ-H

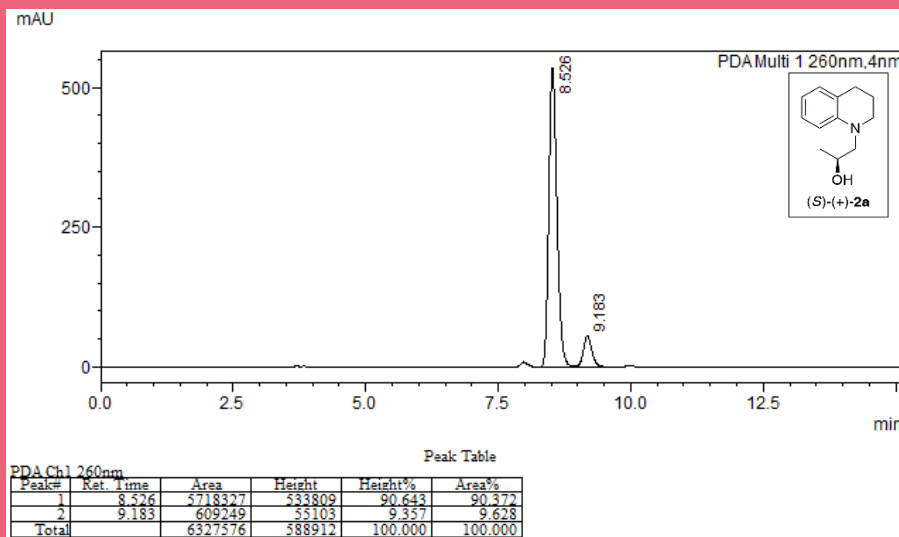

HPLC conditions [for (*R*)-**3a**]: *n*-hexane-*i*-PrOH (90:10, v/v); *f*=0.8 mL/min;  $\lambda$ =260 nm; Chiralcel OJ-H

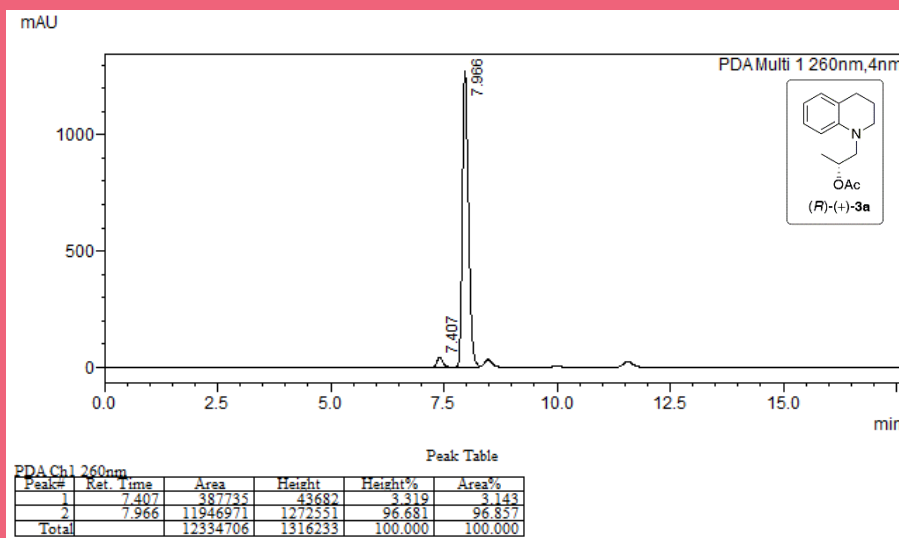

## HPLC analysis for the subsequent biocatalytic reaction:

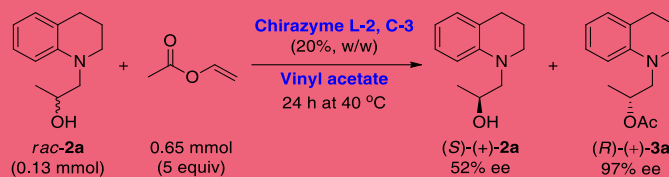

HPLC conditions [for (*S*)-**2a**]: *n*-hexane-*i*-PrOH (90:10, v/v); *f*=0.8 mL/min;  $\lambda$ =260 nm; Chiralcel OJ-H

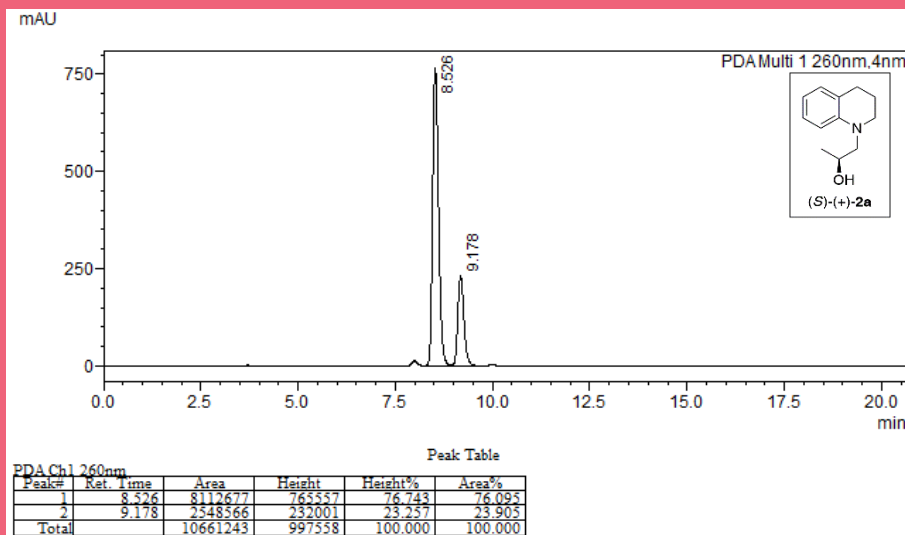

HPLC conditions [for (*R*)-**3a**]: *n*-hexane-*i*-PrOH (90:10, v/v); *f*=0.8 mL/min;  $\lambda$ =260 nm; Chiralcel OJ-H

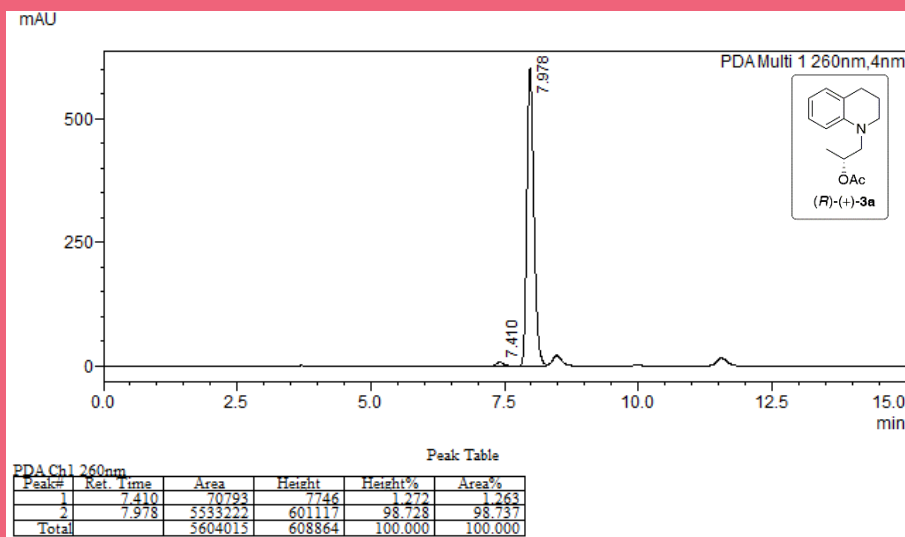

## HPLC analysis for the subsequent biocatalytic reaction:

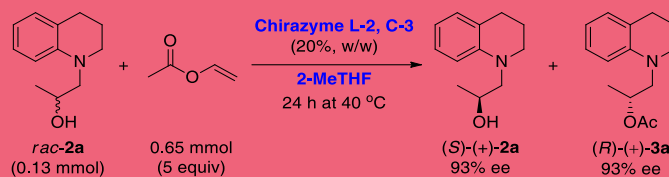

HPLC conditions [for (*S*)-**2a**]: *n*-hexane-*i*-PrOH (90:10, v/v); *f*=0.8 mL/min;  $\lambda$ =260 nm; Chiralcel OJ-H

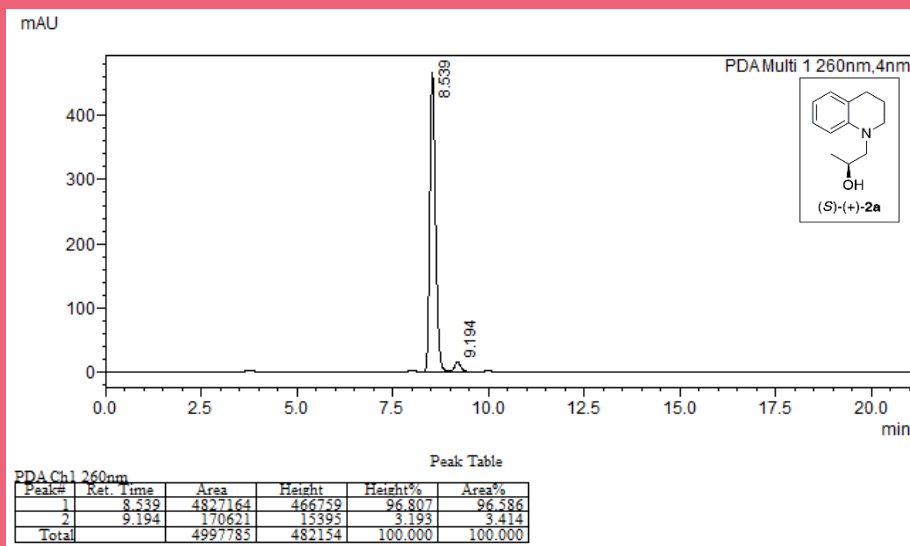

HPLC conditions [for (*R*)-**3a**]: *n*-hexane-*i*-PrOH (90:10, v/v); *f*=0.8 mL/min;  $\lambda$ =260 nm; Chiralcel OJ-H

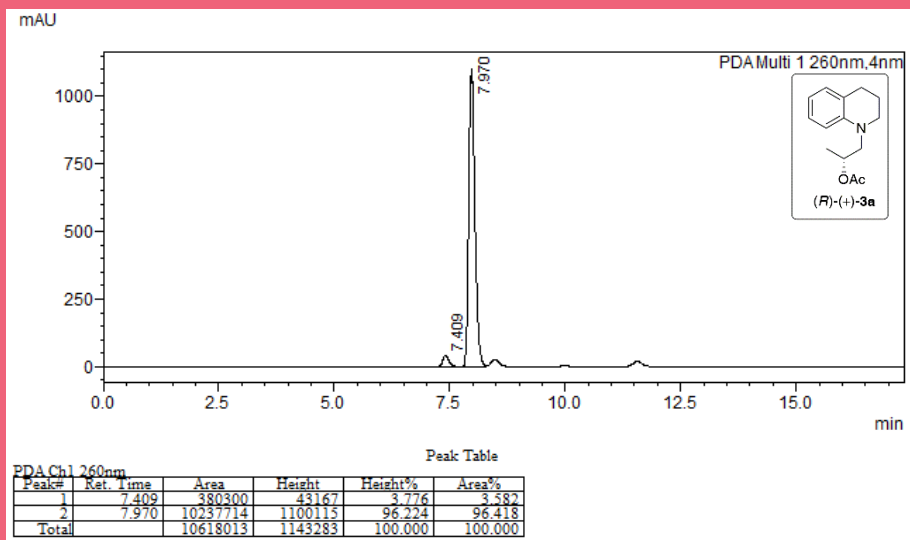

## HPLC analysis for the subsequent biocatalytic reaction:

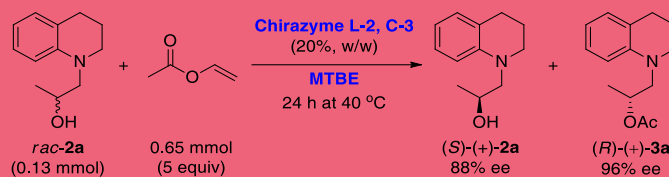

HPLC conditions [for (*S*)-**2a**]: *n*-hexane-*i*-PrOH (90:10, v/v); *f*=0.8 mL/min;  $\lambda$ =260 nm; Chiralcel OJ-H

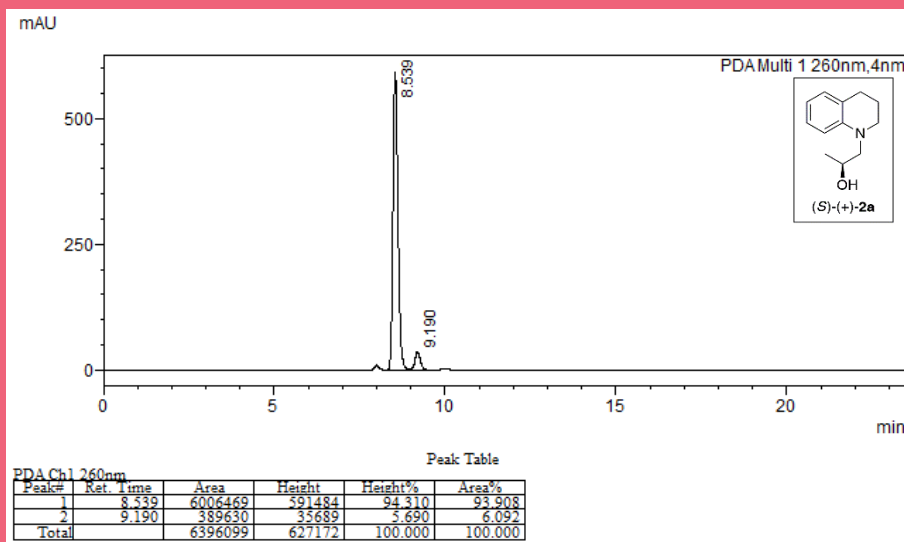

HPLC conditions [for (*R*)-**3a**]: *n*-hexane-*i*-PrOH (90:10, v/v); *f*=0.8 mL/min;  $\lambda$ =260 nm; Chiralcel OJ-H

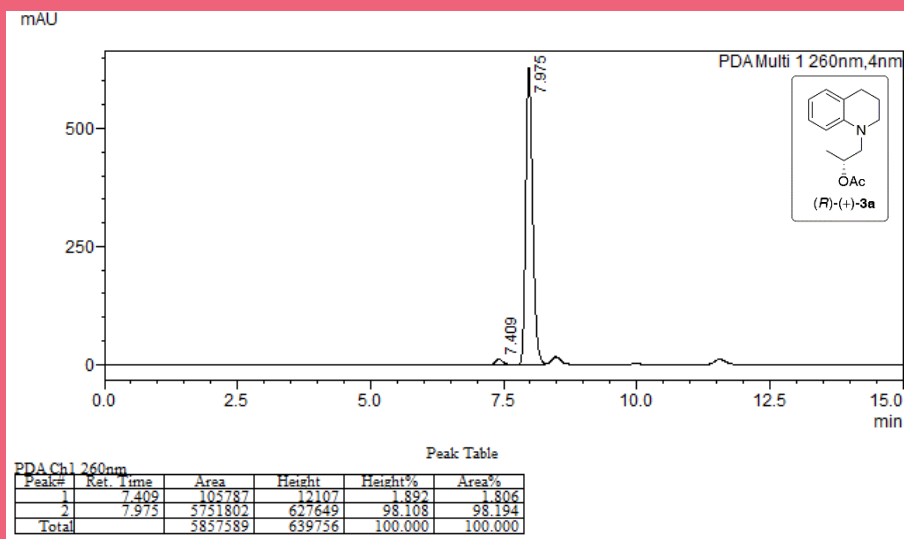



## HPLC analysis for the subsequent biocatalytic reaction:

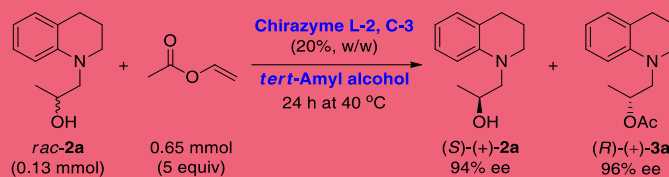

HPLC conditions [for (*S*)-**2a**]: *n*-hexane-*i*-PrOH (90:10, v/v); *f*=0.8 mL/min;  $\lambda$ =260 nm; Chiralcel OJ-H

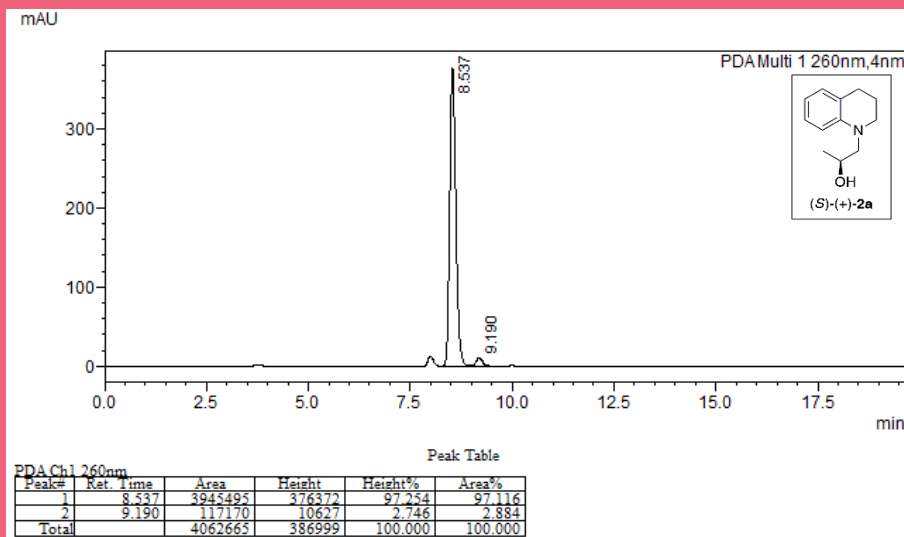

HPLC conditions [for (*R*)-**3a**]: *n*-hexane-*i*-PrOH (90:10, v/v); *f*=0.8 mL/min;  $\lambda$ =260 nm; Chiralcel OJ-H

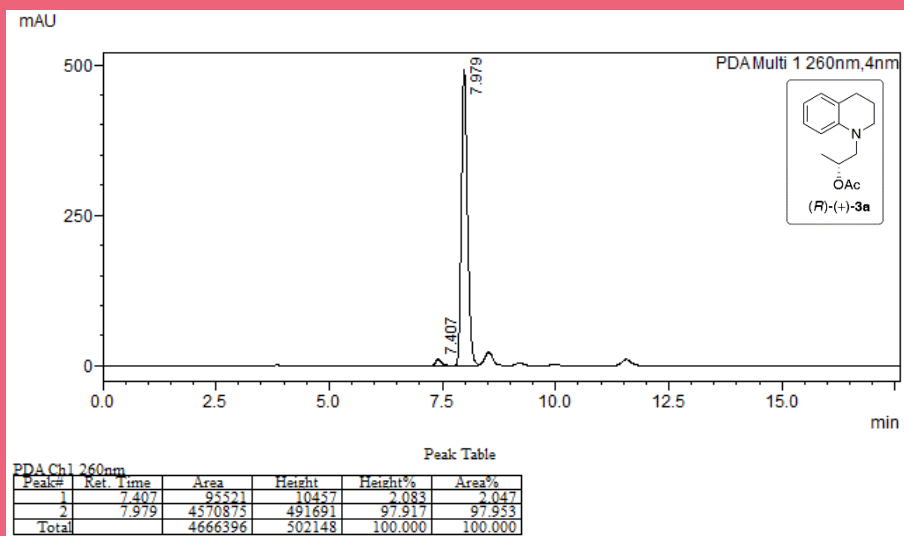

## HPLC analysis for the subsequent biocatalytic reaction:

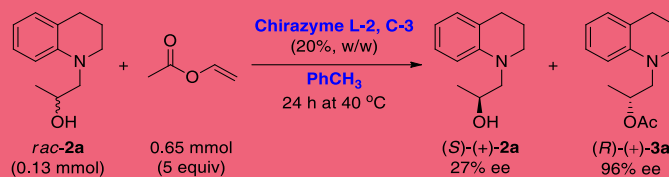

HPLC conditions [for (S)-2a]: *n*-hexane-*i*-PrOH (90:10, v/v); *f*=0.8 mL/min;  $\lambda$ =260 nm; Chiralcel OJ-H

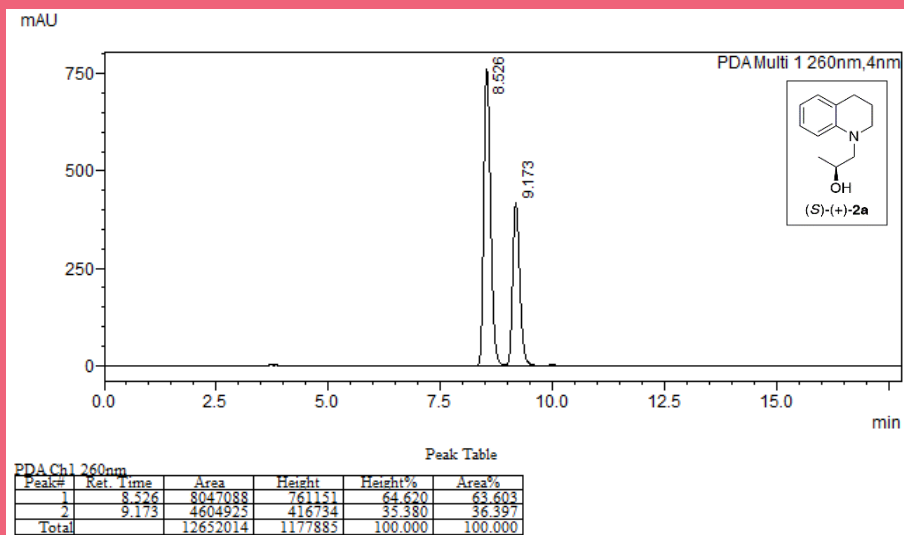

HPLC conditions [for (R)-3a]: *n*-hexane-*i*-PrOH (90:10, v/v); *f*=0.8 mL/min;  $\lambda$ =260 nm; Chiralcel OJ-H

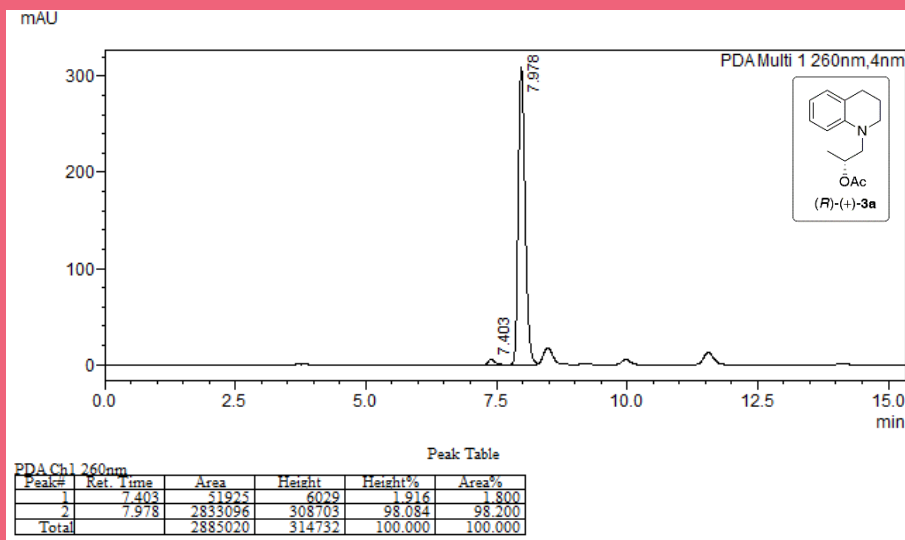

## HPLC analysis for the subsequent biocatalytic reaction:

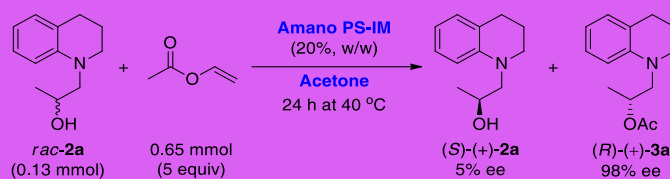

HPLC conditions [for (*S*)-**2a**]: *n*-hexane-*i*-PrOH (90:10, v/v); *f*=0.8 mL/min;  $\lambda$ =260 nm; Chiralcel OJ-H

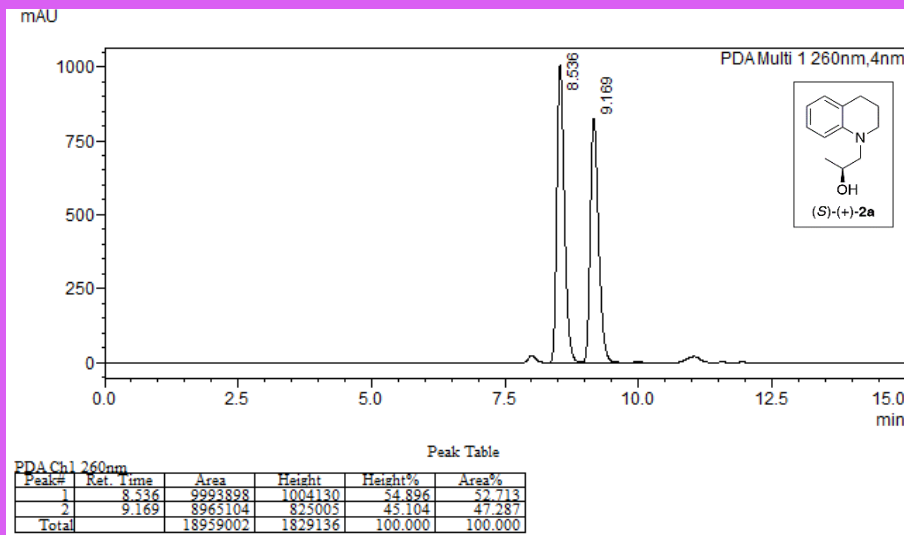

HPLC conditions [for (*R*)-**3a**]: *n*-hexane-*i*-PrOH (90:10, v/v); *f*=0.8 mL/min;  $\lambda$ =260 nm; Chiralcel OJ-H

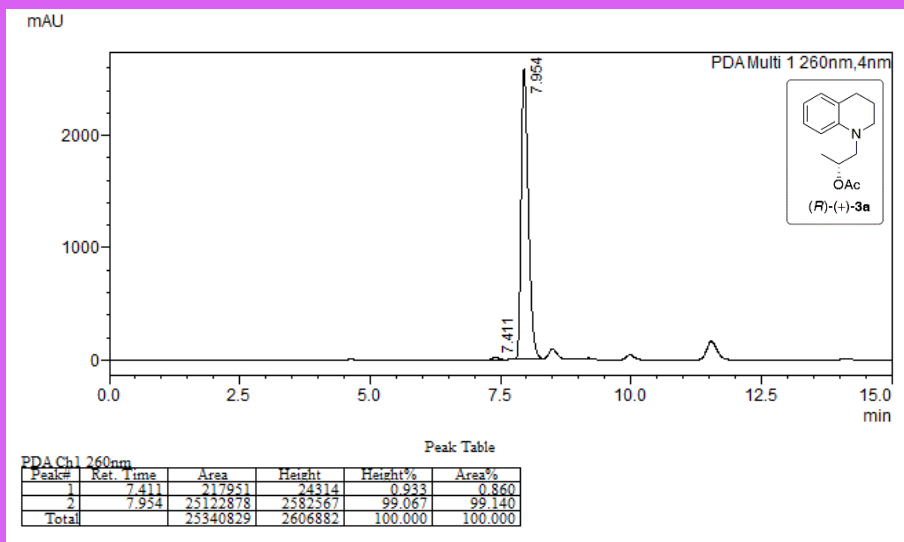

## HPLC analysis for the subsequent biocatalytic reaction:

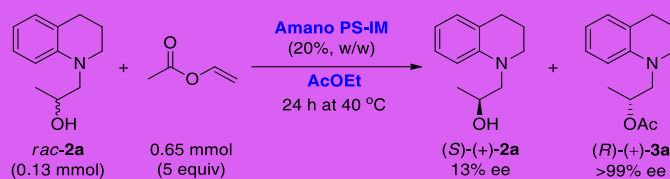

HPLC conditions [for (*S*)-**2a**]: *n*-hexane-*i*-PrOH (90:10, v/v); *f*=0.8 mL/min;  $\lambda$ =260 nm; Chiralcel OJ-H

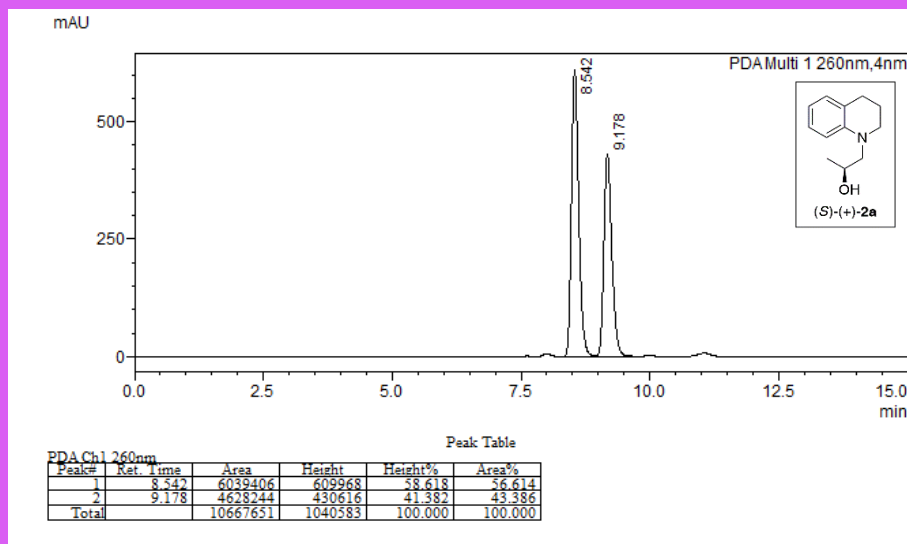

HPLC conditions [for (*R*)-**3a**]: *n*-hexane-*i*-PrOH (90:10, v/v); *f*=0.8 mL/min;  $\lambda$ =260 nm; Chiralcel OJ-H

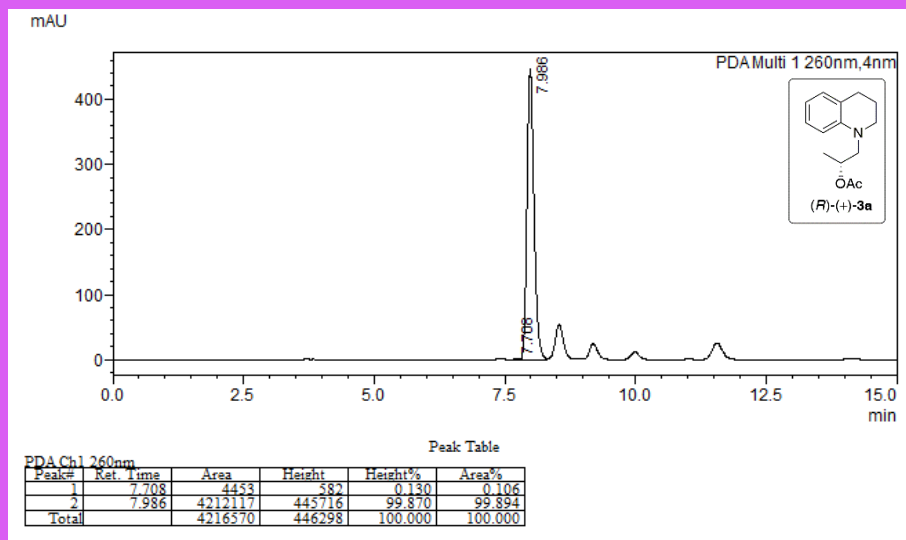

## HPLC analysis for the subsequent biocatalytic reaction:

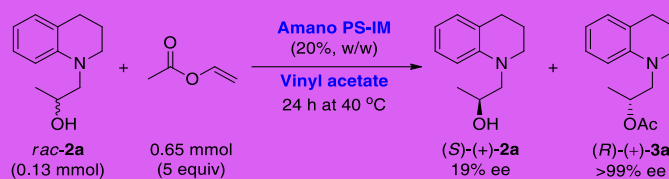

HPLC conditions [for (*S*)-**2a**]: *n*-hexane-*i*-PrOH (90:10, v/v); *f*=0.8 mL/min;  $\lambda$ =260 nm; Chiralcel OJ-H

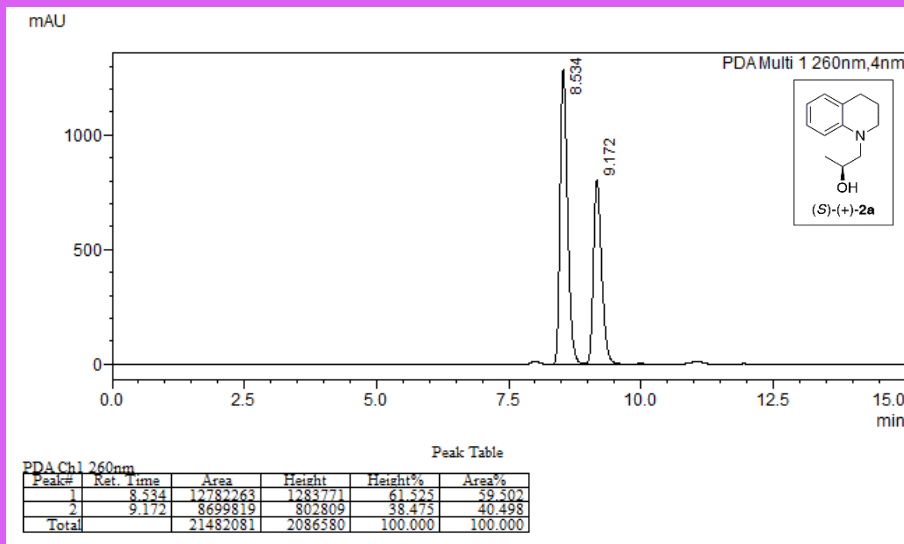

HPLC conditions [for (*R*)-**3a**]: *n*-hexane-*i*-PrOH (90:10, v/v); *f*=0.8 mL/min;  $\lambda$ =260 nm; Chiralcel OJ-H

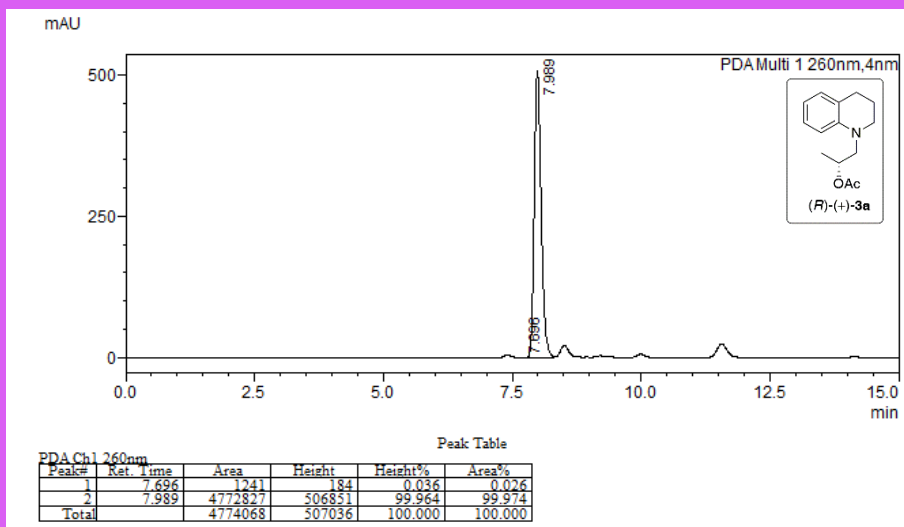

## HPLC analysis for the subsequent biocatalytic reaction:

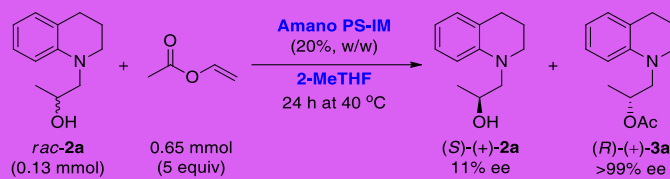

HPLC conditions [for (*S*)-**2a**]: *n*-hexane-*i*-PrOH (90:10, v/v); *f*=0.8 mL/min;  $\lambda$ =260 nm; Chiralcel OJ-H

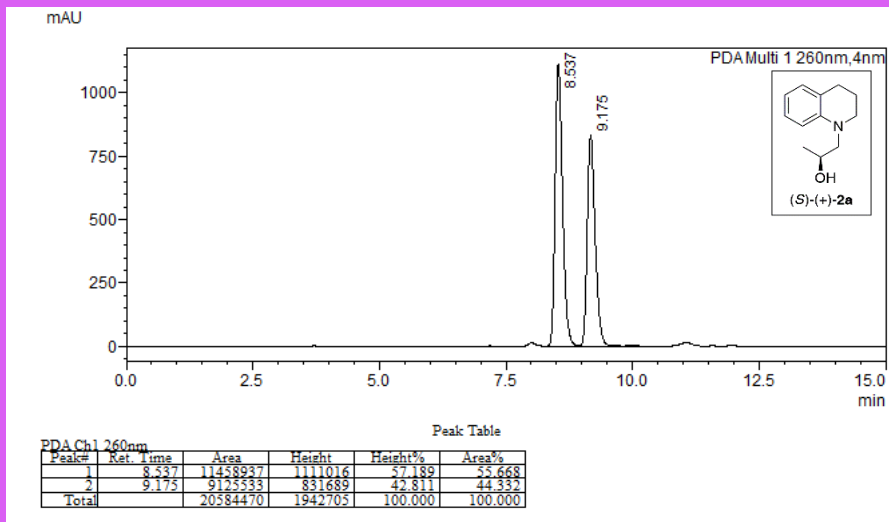

HPLC conditions [for (*R*)-**3a**]: *n*-hexane-*i*-PrOH (90:10, v/v); *f*=0.8 mL/min;  $\lambda$ =260 nm; Chiralcel OJ-H

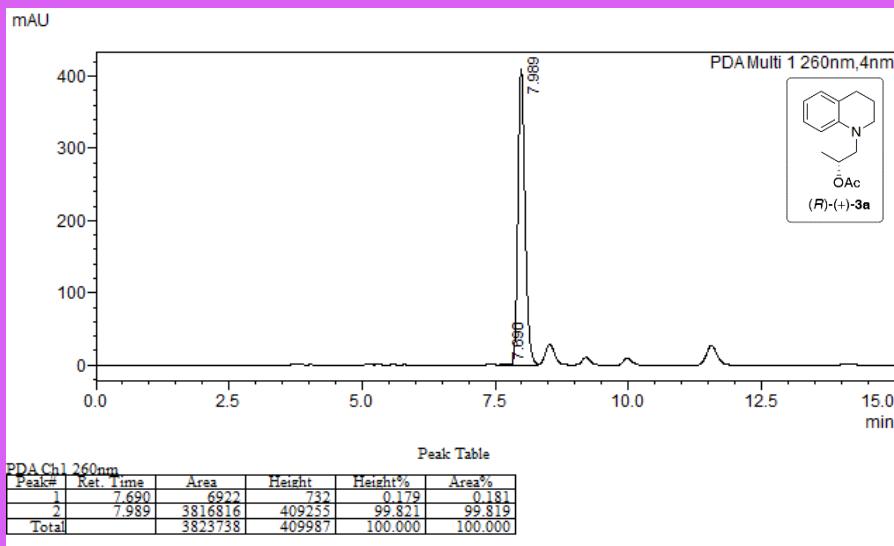

## HPLC analysis for the subsequent biocatalytic reaction:

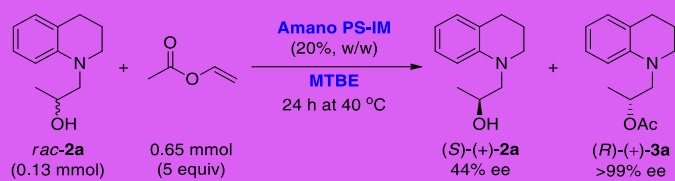

HPLC conditions [for (*S*)-**2a**]: *n*-hexane-*i*-PrOH (90:10, v/v); *f*=0.8 mL/min;  $\lambda$ =260 nm; Chiralcel OJ-H

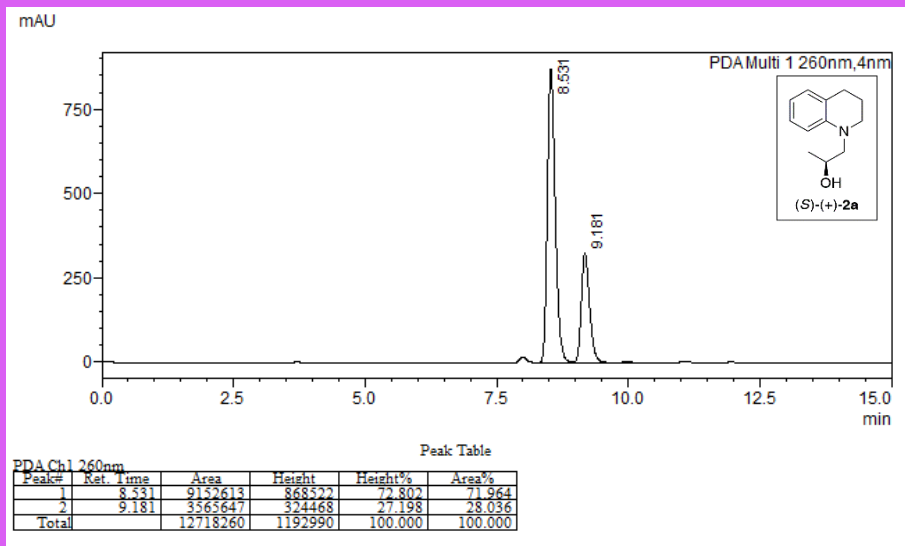

HPLC conditions [for (*R*)-**3a**]: *n*-hexane-*i*-PrOH (90:10, v/v); *f*=0.8 mL/min;  $\lambda$ =260 nm; Chiralcel OJ-H

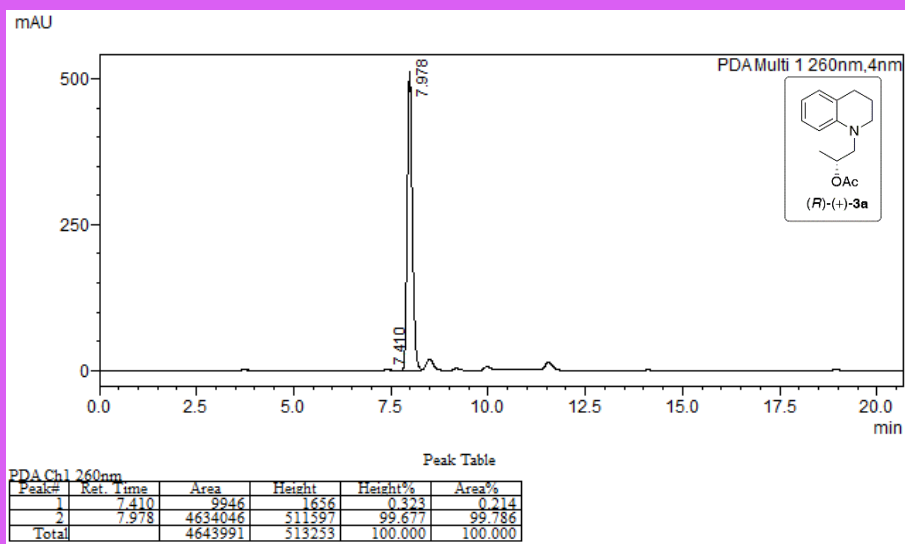

## HPLC analysis for the subsequent biocatalytic reaction:

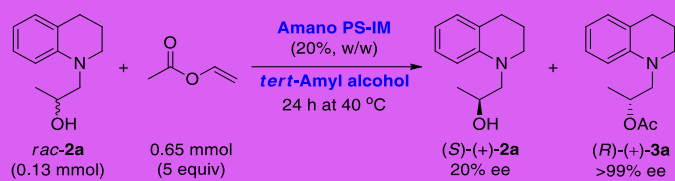

HPLC conditions [for (*S*)-**2a**]: *n*-hexane-*i*-PrOH (90:10, v/v); *f*=0.8 mL/min;  $\lambda$ =260 nm; Chiralcel OJ-H

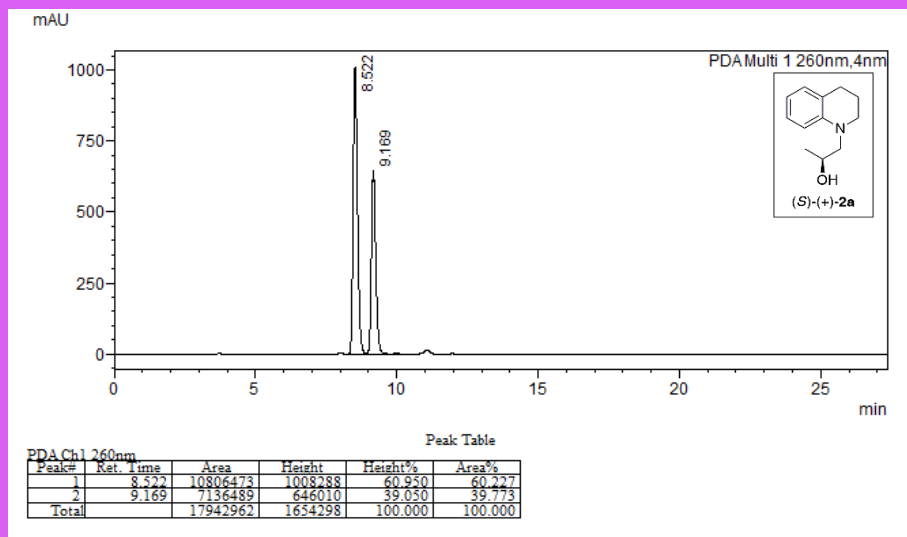

HPLC conditions [for (*R*)-**3a**]: *n*-hexane-*i*-PrOH (90:10, v/v); *f*=0.8 mL/min;  $\lambda$ =260 nm; Chiralcel OJ-H

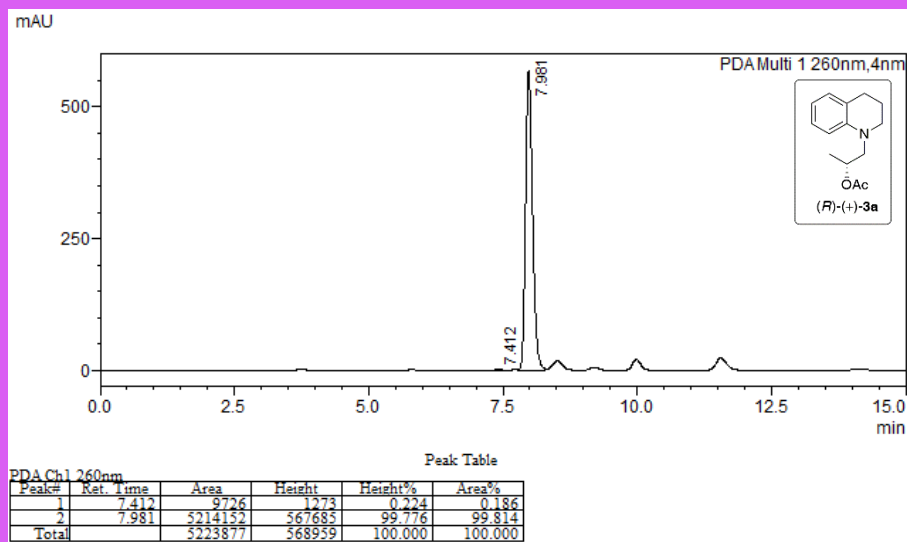



## HPLC analysis for the subsequent biocatalytic reaction:

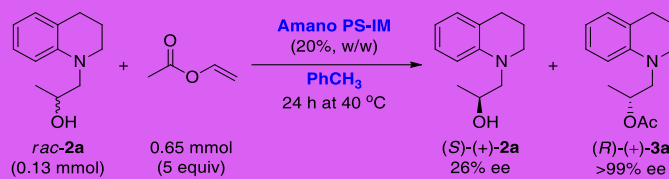

HPLC conditions [for (*S*)-**2a**]: *n*-hexane-*i*-PrOH (90:10, v/v); *f*=0.8 mL/min;  $\lambda$ =260 nm; Chiralcel OJ-H

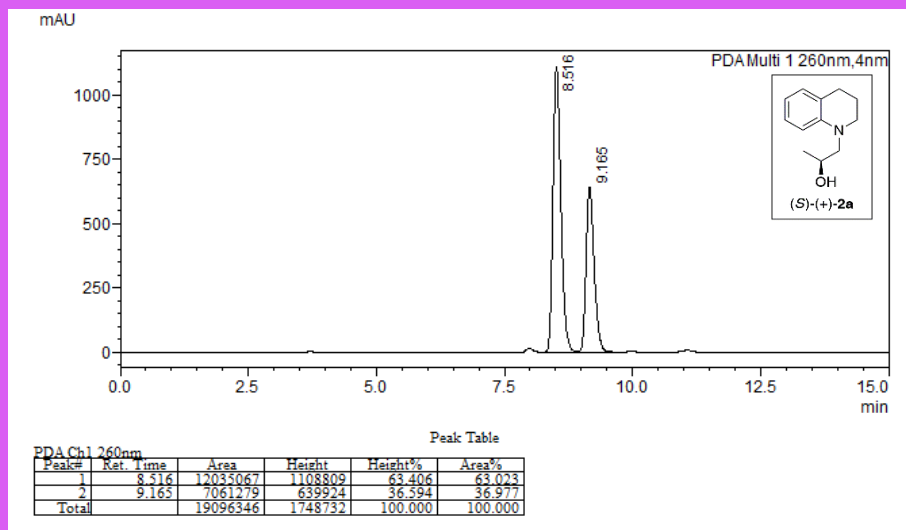

HPLC conditions [for (*R*)-**3a**]: *n*-hexane-*i*-PrOH (90:10, v/v); *f*=0.8 mL/min;  $\lambda$ =260 nm; Chiralcel OJ-H

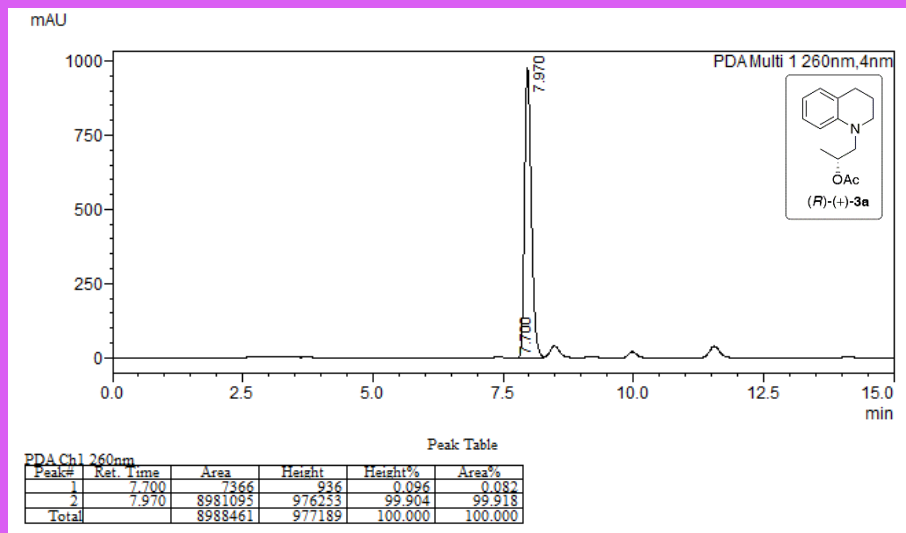

## HPLC analysis for the subsequent biocatalytic reaction:

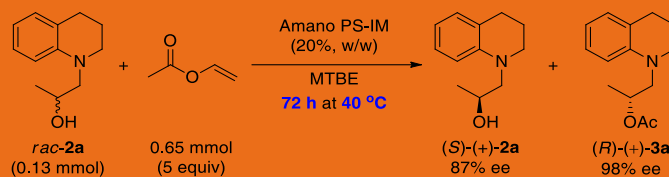

HPLC conditions [for (*S*)-**2a**]: *n*-hexane-*i*-PrOH (90:10, v/v); *f*=0.8 mL/min;  $\lambda$ =260 nm; Chiralcel OJ-H

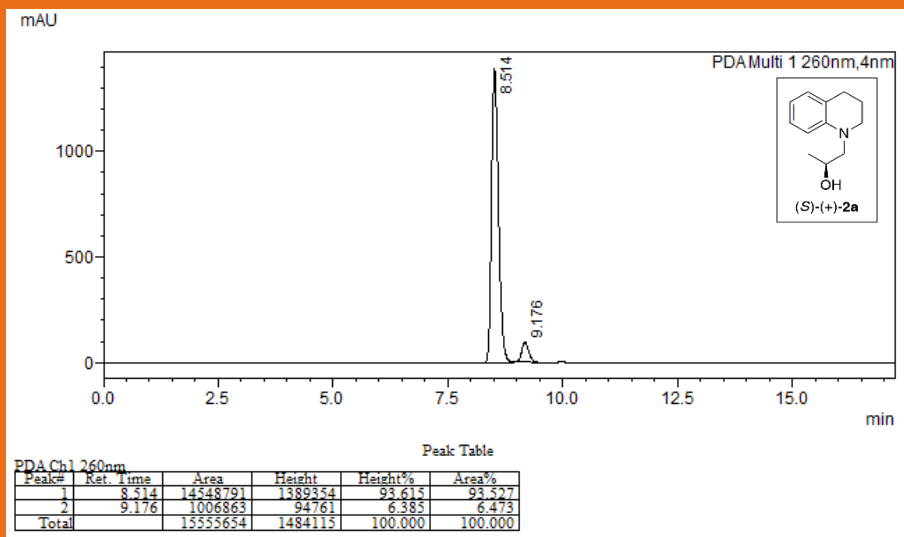

HPLC conditions [for (*R*)-**3a**]: *n*-hexane-*i*-PrOH (90:10, v/v); *f*=0.8 mL/min;  $\lambda$ =260 nm; Chiralcel OJ-H

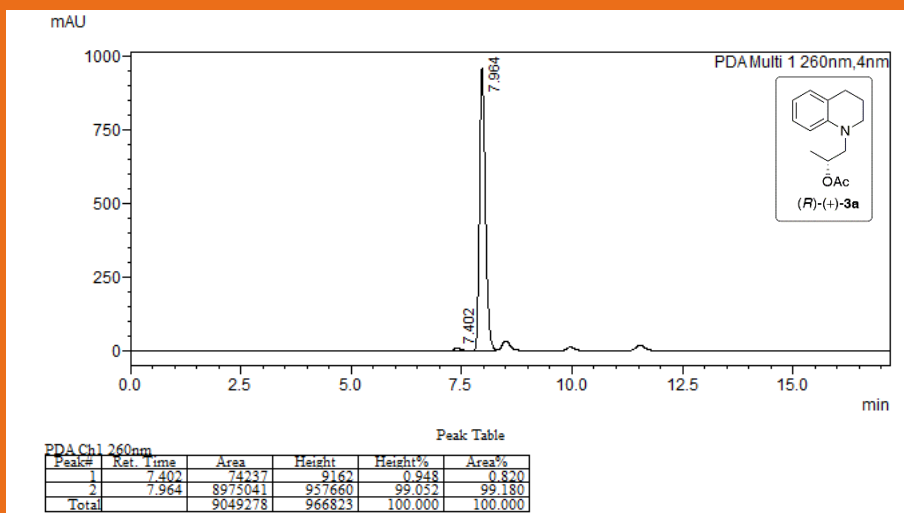

## HPLC analysis for the subsequent biocatalytic reaction:

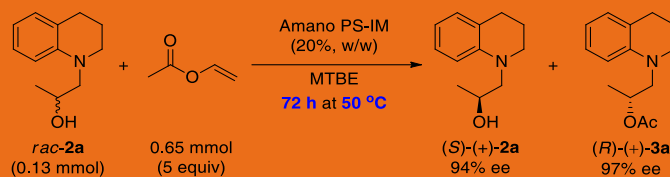

HPLC conditions [for (*S*)-**2a**]: *n*-hexane-*i*-PrOH (90:10, v/v); *f*=0.8 mL/min;  $\lambda$ =260 nm; Chiralcel OJ-H

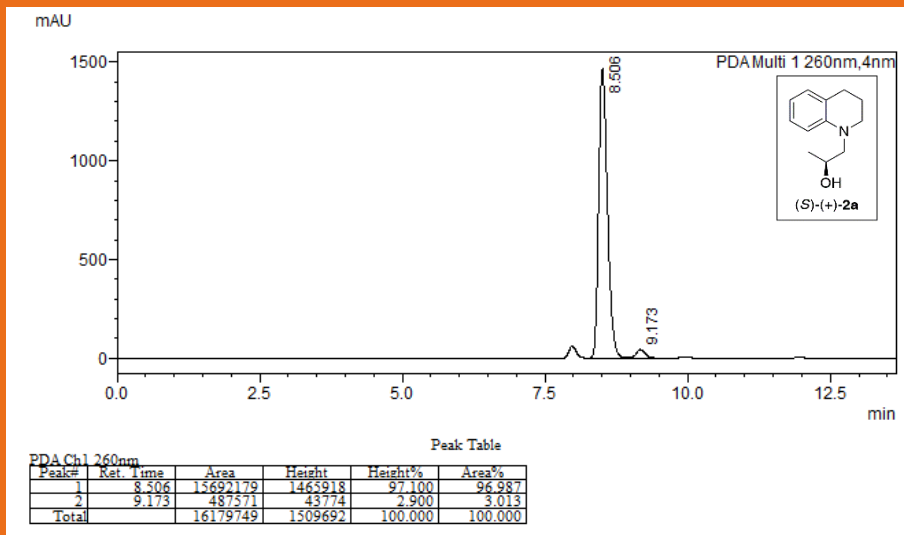

HPLC conditions [for (*R*)-**3a**]: *n*-hexane-*i*-PrOH (90:10, v/v); *f*=0.8 mL/min;  $\lambda$ =260 nm; Chiralcel OJ-H

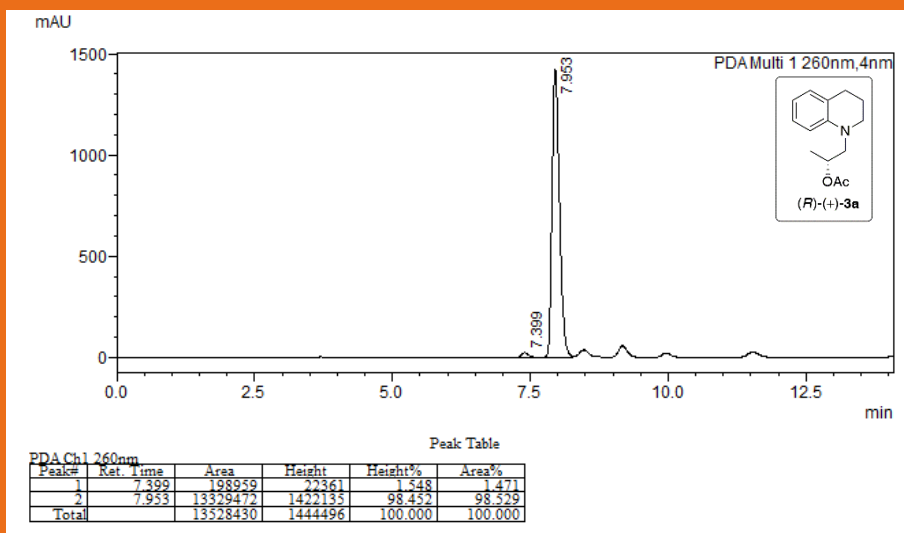

## HPLC analysis for the subsequent biocatalytic reaction:

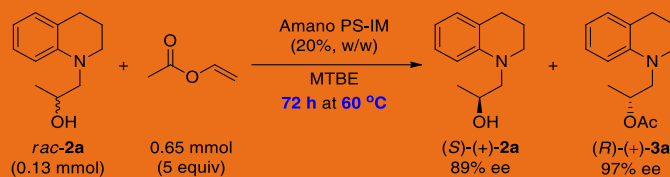

HPLC conditions [for (*S*)-**2a**]: *n*-hexane-*i*-PrOH (90:10, v/v); *f*=0.8 mL/min;  $\lambda$ =260 nm; Chiralcel OJ-H

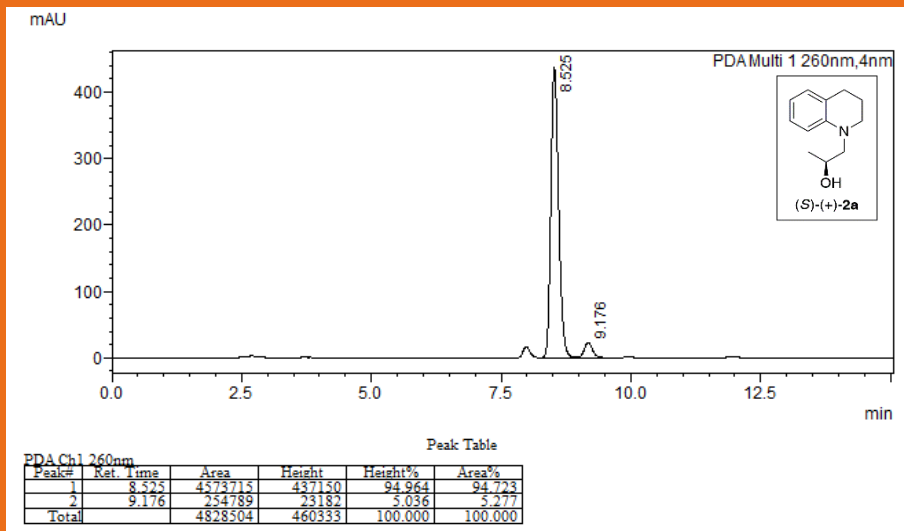

HPLC conditions [for (*R*)-**3a**]: *n*-hexane-*i*-PrOH (90:10, v/v); *f*=0.8 mL/min;  $\lambda$ =260 nm; Chiralcel OJ-H

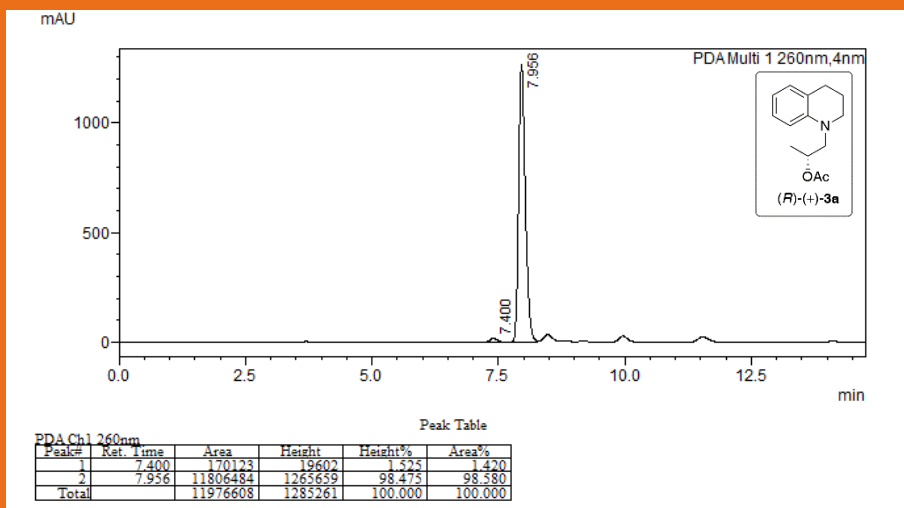

## HPLC analysis for the subsequent biocatalytic reaction:

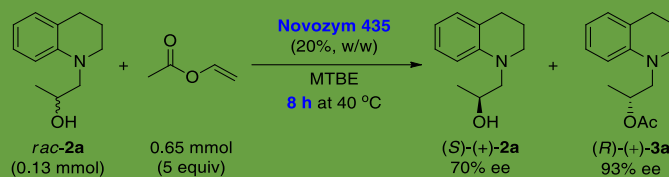

HPLC conditions [for (*S*)-**2a**]: *n*-hexane-*i*-PrOH (90:10, v/v); *f*=0.8 mL/min;  $\lambda$ =260 nm; Chiralcel OJ-H

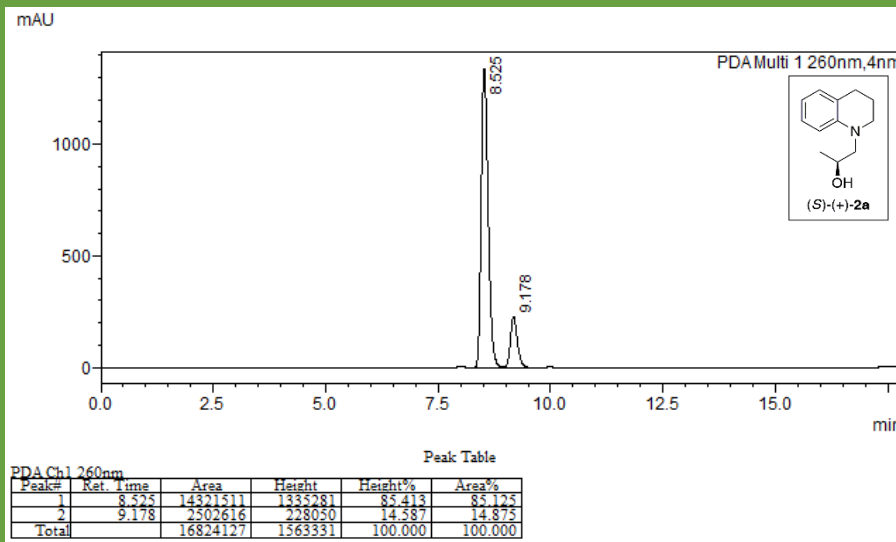

HPLC conditions [for (*R*)-**3a**]: *n*-hexane-*i*-PrOH (90:10, v/v); *f*=0.8 mL/min;  $\lambda$ =260 nm; Chiralcel OJ-H

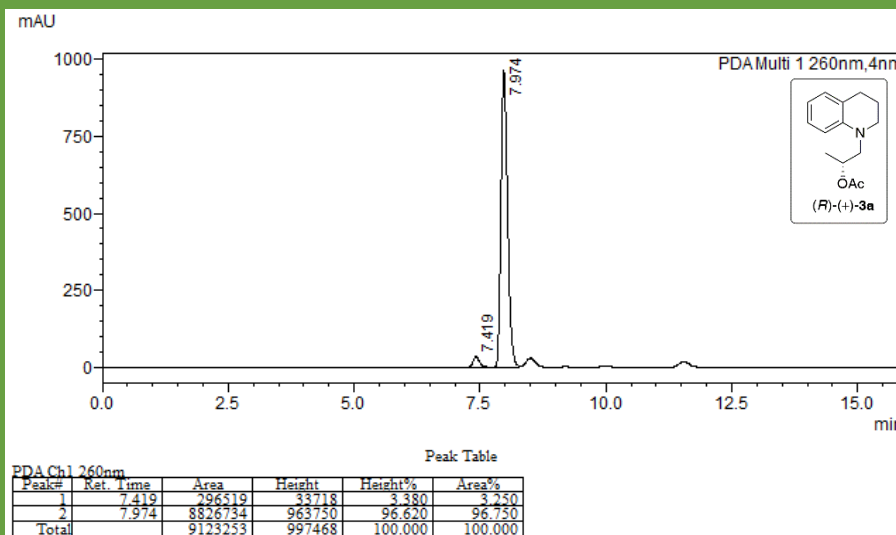

## HPLC analysis for the subsequent biocatalytic reaction:

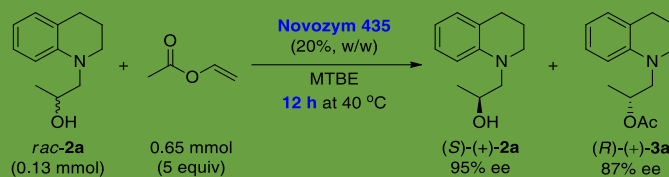

HPLC conditions [for (*S*)-**2a**]: *n*-hexane-*i*-PrOH (90:10, v/v); *f*=0.8 mL/min;  $\lambda$ =260 nm; Chiralcel OJ-H

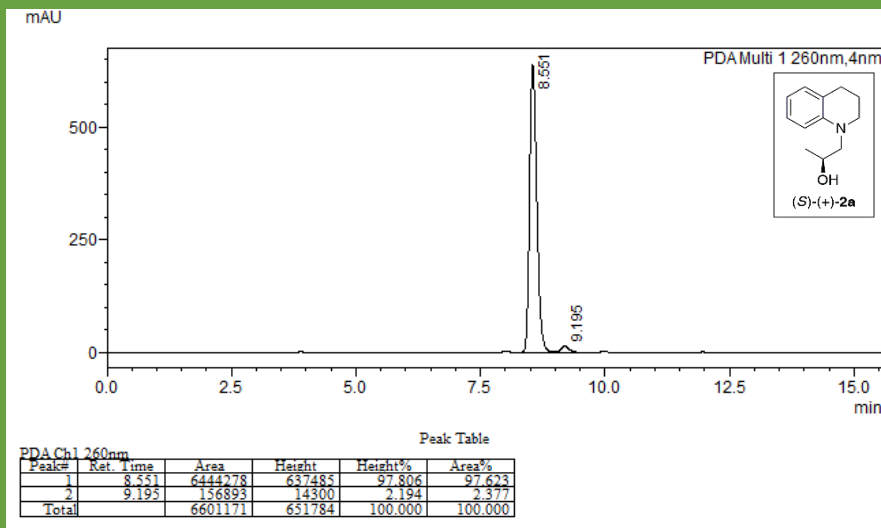

HPLC conditions [for (*R*)-**3a**]: *n*-hexane-*i*-PrOH (90:10, v/v); *f*=0.8 mL/min;  $\lambda$ =260 nm; Chiralcel OJ-H

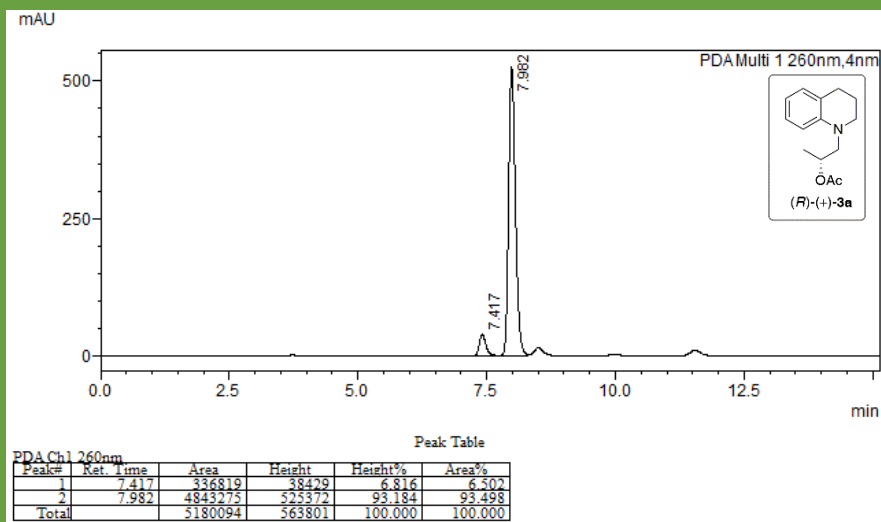

## HPLC analysis for the subsequent biocatalytic reaction:

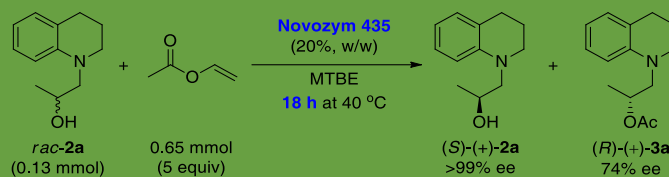

HPLC conditions [for (*S*)-**2a**]: *n*-hexane-*i*-PrOH (90:10, v/v); *f*=0.8 mL/min;  $\lambda$ =260 nm; Chiralcel OJ-H

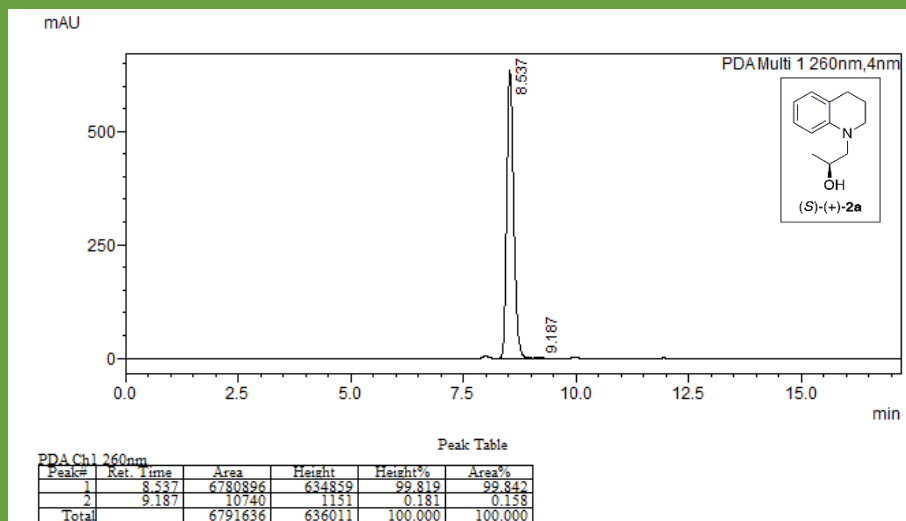

HPLC conditions [for (*R*)-**3a**]: *n*-hexane-*i*-PrOH (90:10, v/v); *f*=0.8 mL/min;  $\lambda$ =260 nm; Chiralcel OJ-H

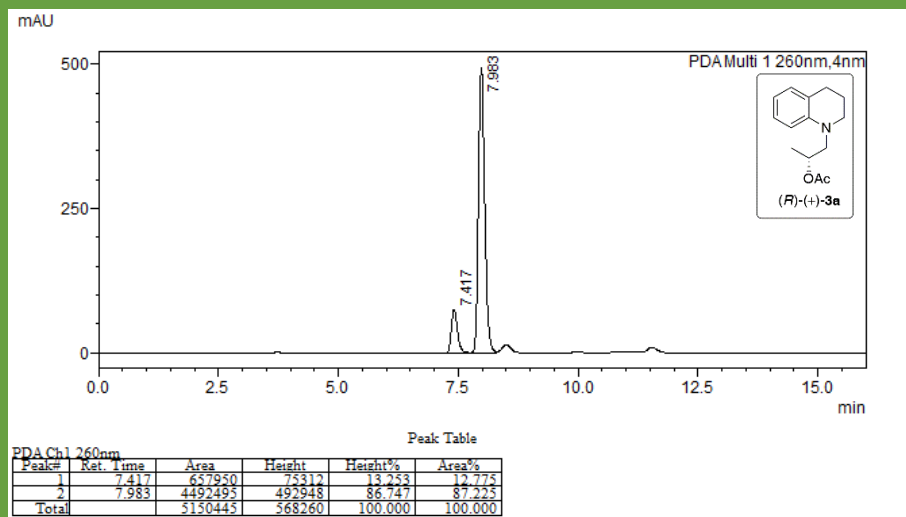

## HPLC analysis for the subsequent biocatalytic reaction:

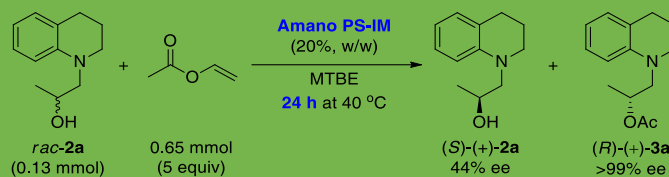

HPLC conditions [for (*S*)-**2a**]: *n*-hexane-*i*-PrOH (90:10, v/v); *f*=0.8 mL/min;  $\lambda$ =260 nm; Chiralcel OJ-H

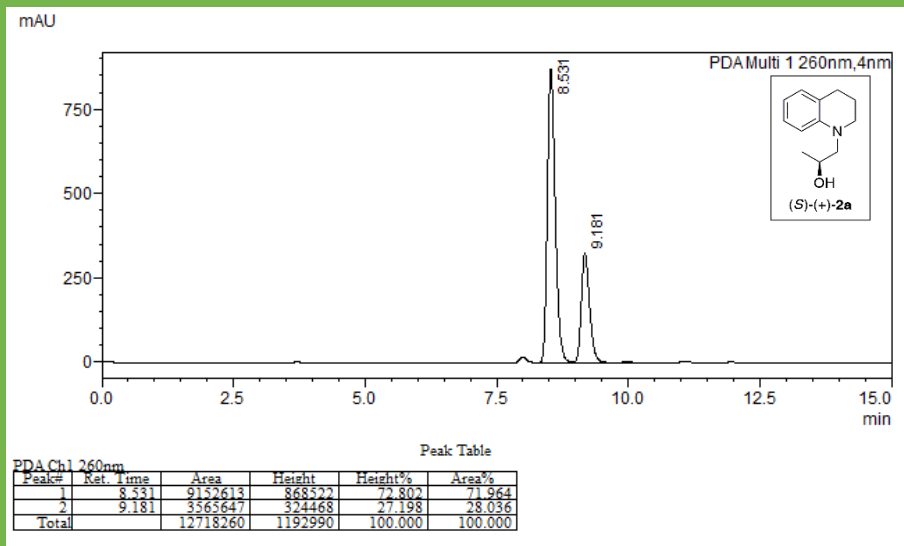

HPLC conditions [for (*R*)-**3a**]: *n*-hexane-*i*-PrOH (90:10, v/v); *f*=0.8 mL/min;  $\lambda$ =260 nm; Chiralcel OJ-H

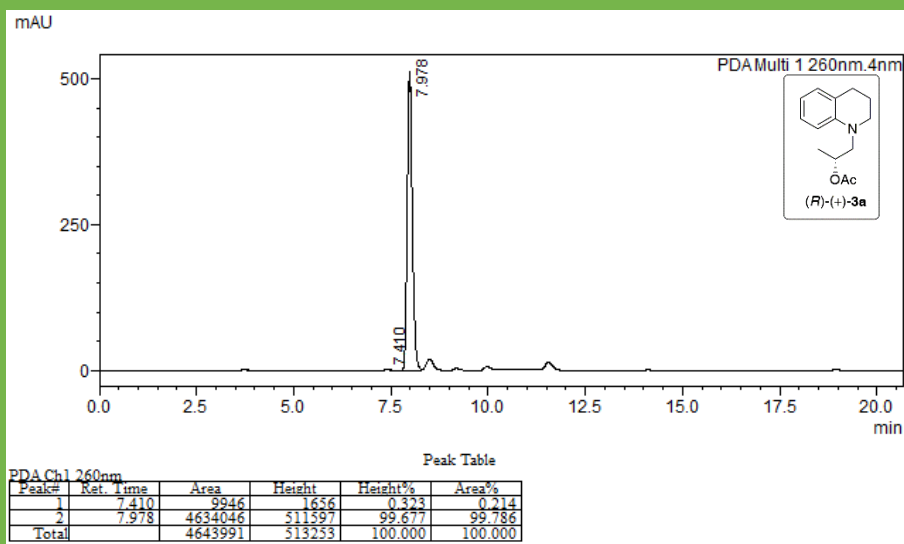



## HPLC analysis for the subsequent biocatalytic reaction:

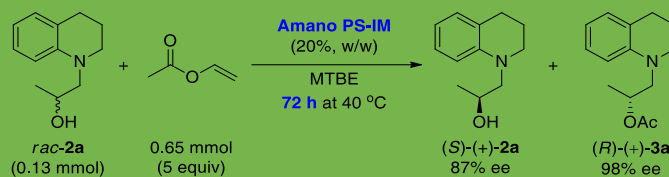

HPLC conditions [for (*S*)-**2a**]: *n*-hexane-*i*-PrOH (90:10, v/v); *f*=0.8 mL/min;  $\lambda$ =260 nm; Chiralcel OJ-H

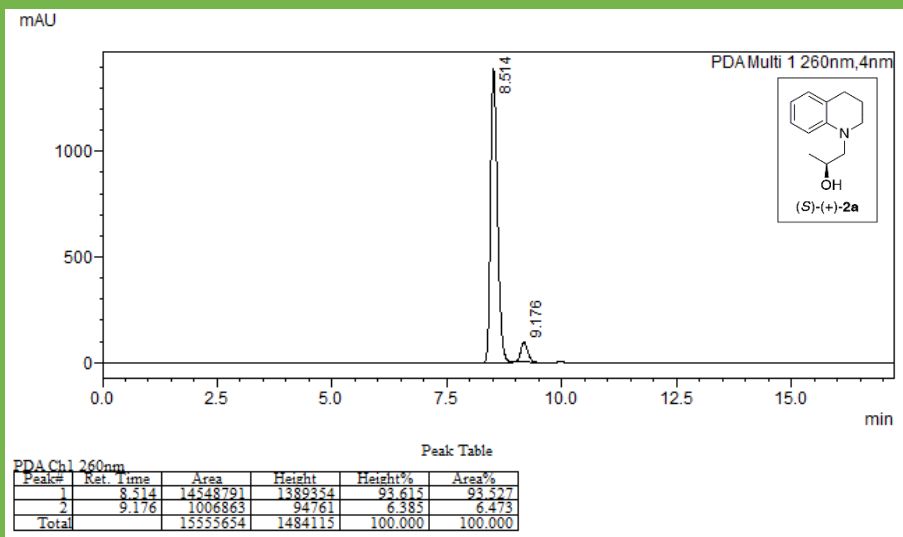

HPLC conditions [for (*R*)-**3a**]: *n*-hexane-*i*-PrOH (90:10, v/v); *f*=0.8 mL/min;  $\lambda$ =260 nm; Chiralcel OJ-H

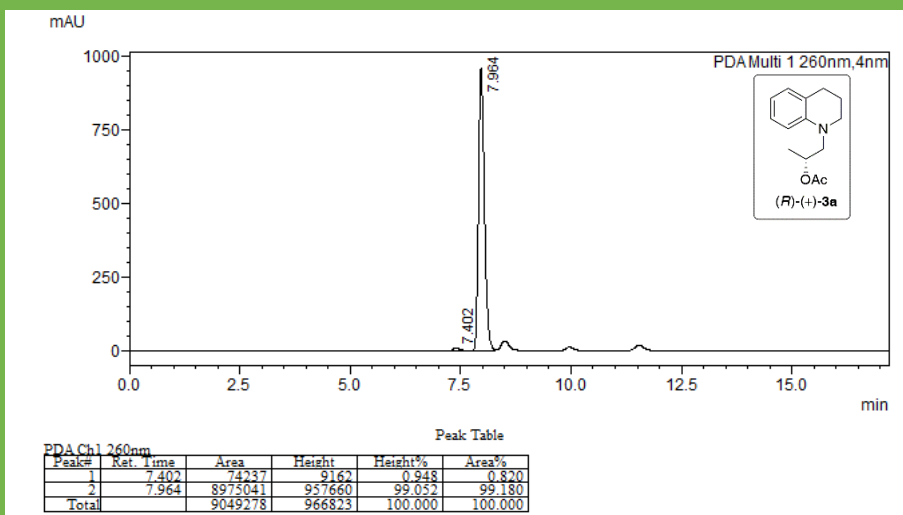

## HPLC analysis for the subsequent biocatalytic reaction:

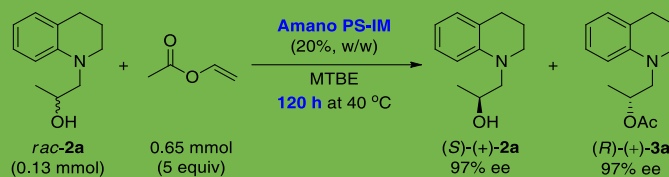

HPLC conditions [for (*S*)-**2a**]: *n*-hexane-*i*-PrOH (90:10, v/v); f=0.8 mL/min; λ=260 nm; Chiralcel OJ-H

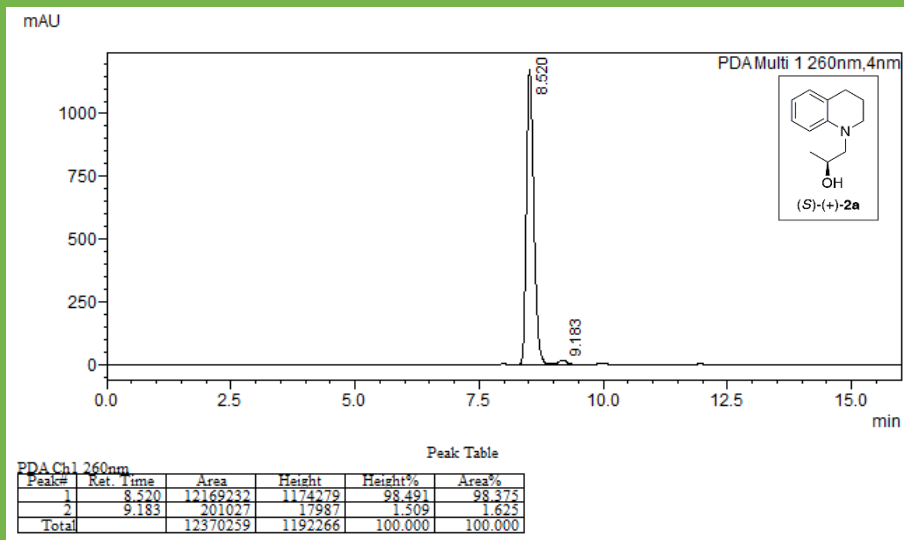

HPLC conditions [for (*R*)-**3a**]: *n*-hexane-*i*-PrOH (90:10, v/v); f=0.8 mL/min; λ=260 nm; Chiralcel OJ-H

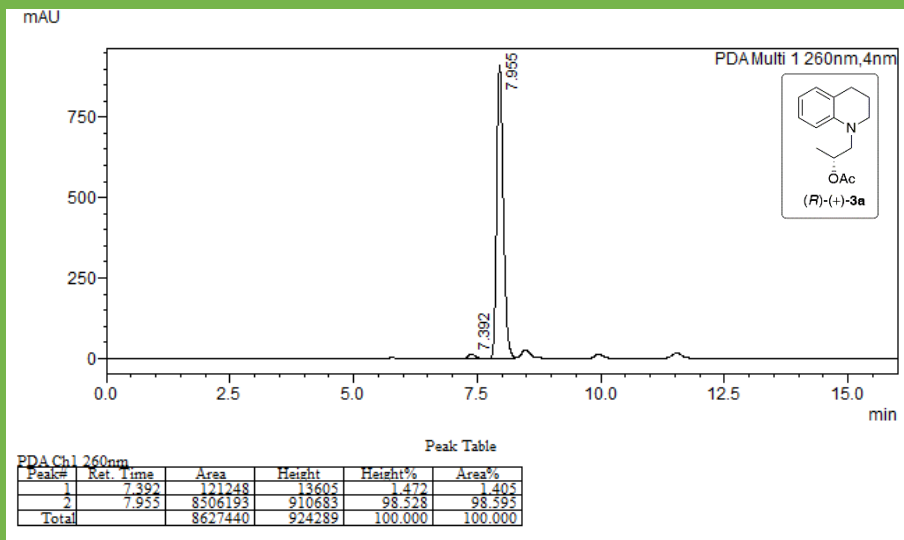

## HPLC analysis for the subsequent biocatalytic reaction:

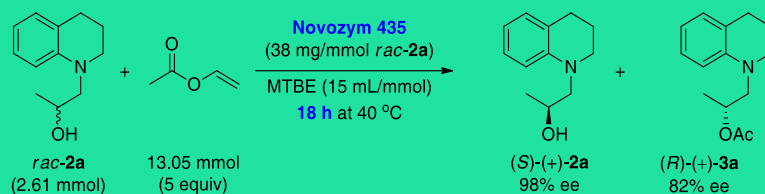

HPLC conditions [for (*S*)-**2a**]: *n*-hexane-*i*-PrOH (90:10, v/v); *f*=0.8 mL/min;  $\lambda$ =260 nm; Chiralcel OJ-H

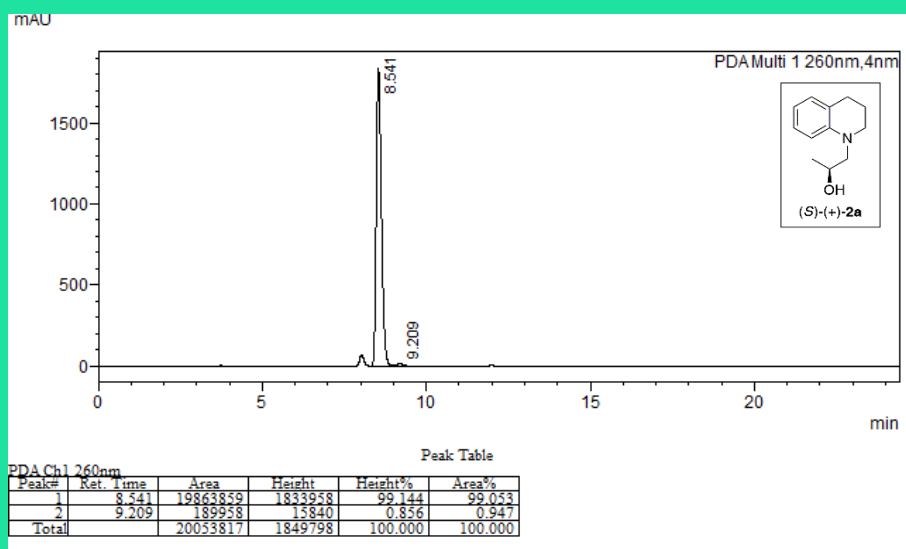

HPLC conditions [for (*R*)-**3a**]: *n*-hexane-*i*-PrOH (90:10, v/v); *f*=0.8 mL/min;  $\lambda$ =260 nm; Chiralcel OJ-H

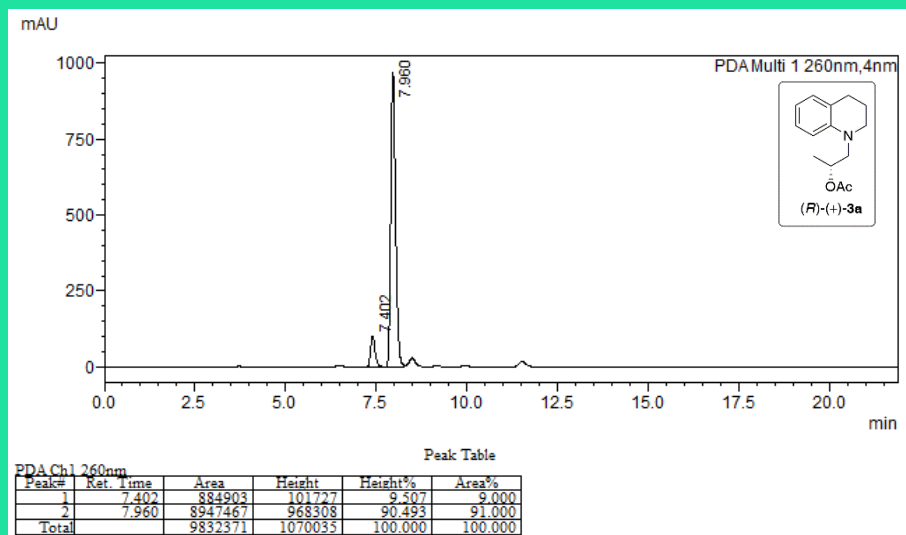

## HPLC analysis for the subsequent biocatalytic reaction:

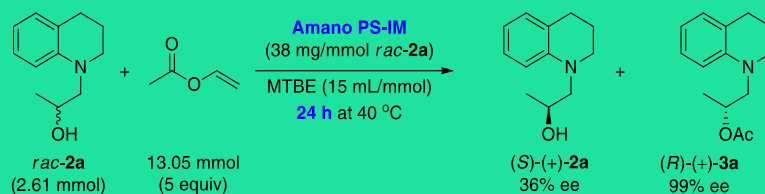

HPLC conditions [for (*S*)-**2a**]: *n*-hexane-*i*-PrOH (90:10, v/v); *f*=0.8 mL/min;  $\lambda$ =260 nm; Chiralcel OJ-H

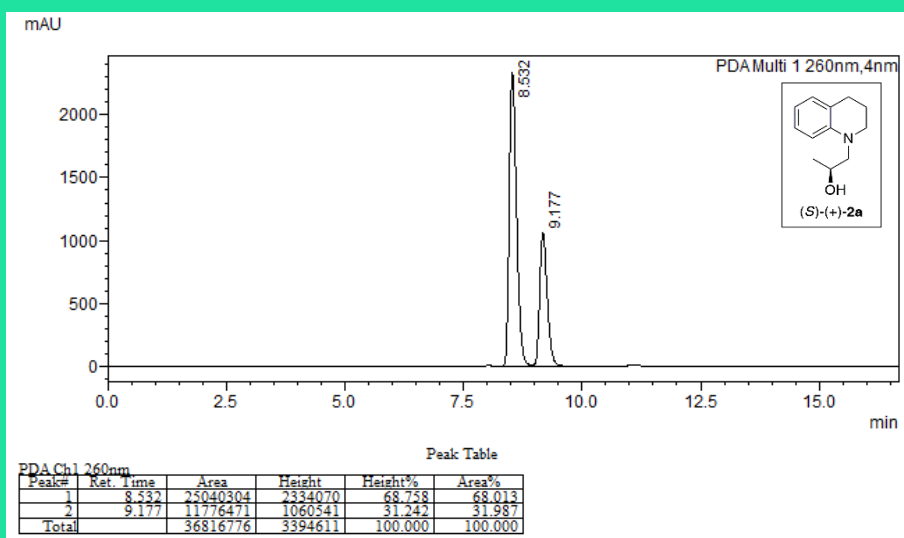

HPLC conditions [for (*R*)-**3a**]: *n*-hexane-*i*-PrOH (90:10, v/v); *f*=0.8 mL/min;  $\lambda$ =260 nm; Chiralcel OJ-H

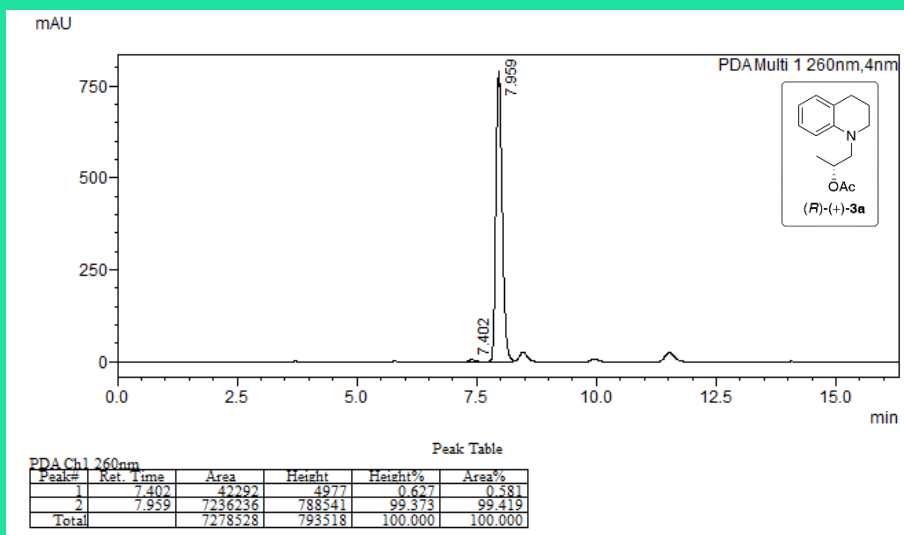

## HPLC analysis for the subsequent biocatalytic reaction:

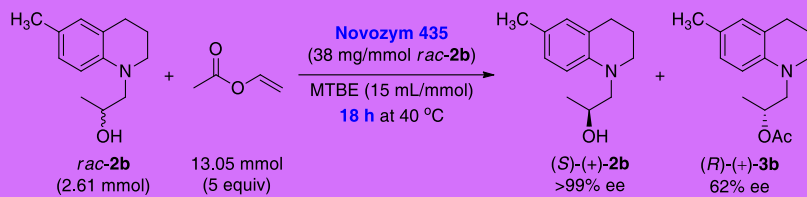

HPLC conditions [for (*S*)-**2b**]: *n*-hexane-*i*-PrOH (97:3, v/v); *f*=0.8 mL/min;  $\lambda$ =260 nm; Chiralcel OJ-H

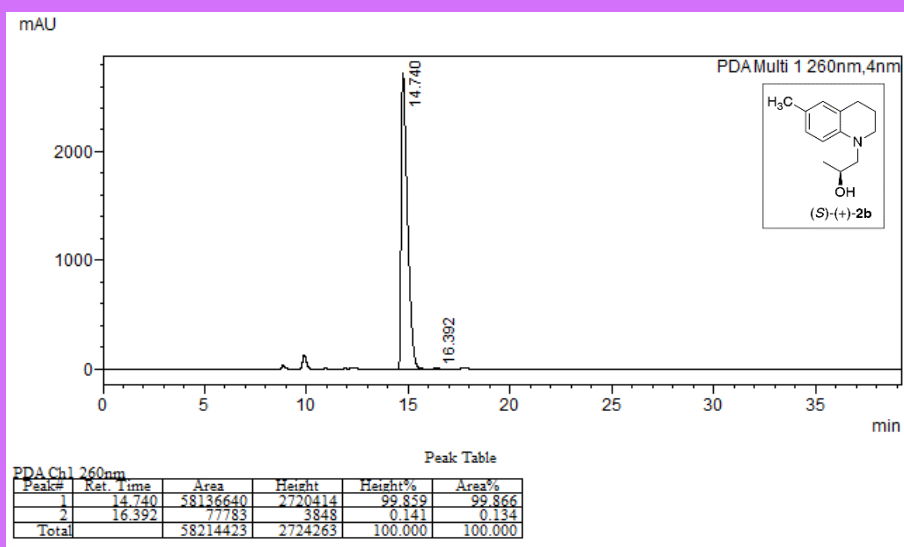

HPLC conditions [for (*R*)-**3b**]: *n*-hexane-*i*-PrOH (97:3, v/v); *f*=0.8 mL/min;  $\lambda$ =260 nm; Chiralcel OJ-H

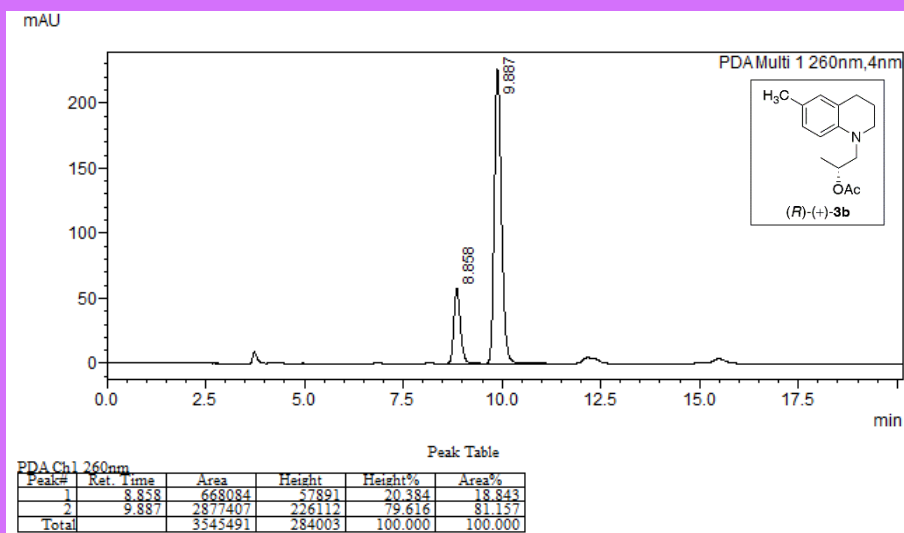

## HPLC analysis for the subsequent biocatalytic reaction:

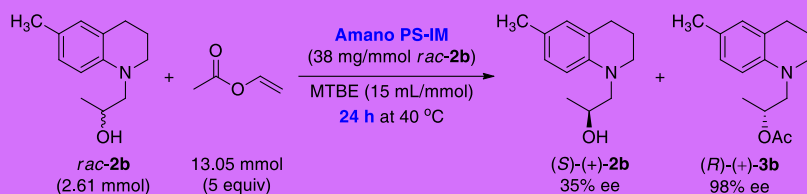

HPLC conditions [for (*S*)-**2b**]: *n*-hexane-*i*-PrOH (97:3, v/v); *f*=0.8 mL/min;  $\lambda$ =260 nm; Chiralcel OJ-H

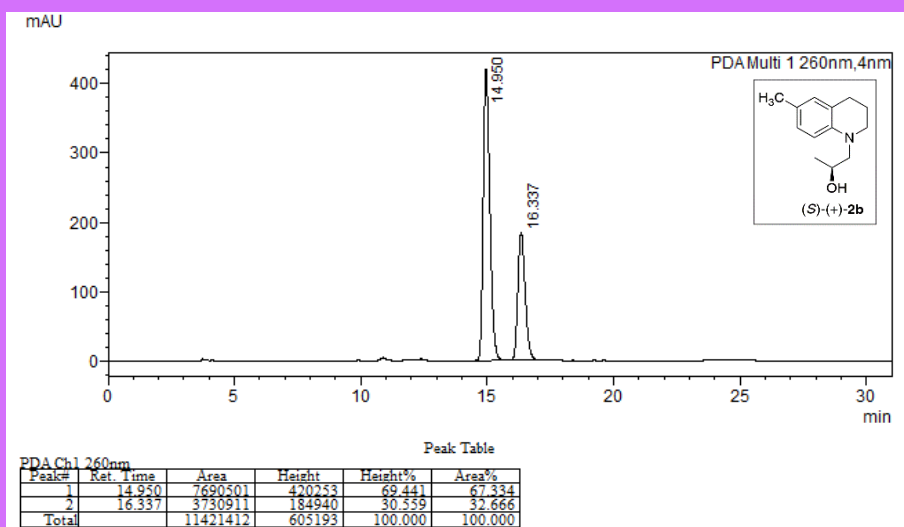

HPLC conditions [for (*R*)-**3b**]: *n*-hexane-*i*-PrOH (97:3, v/v); *f*=0.8 mL/min;  $\lambda$ =260 nm; Chiralcel OJ-H

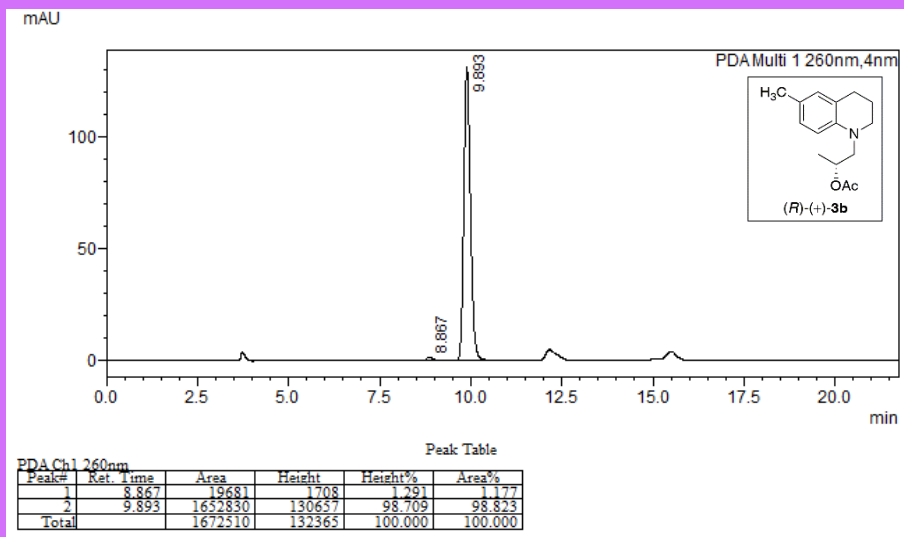

## HPLC analysis for the subsequent biocatalytic reaction:

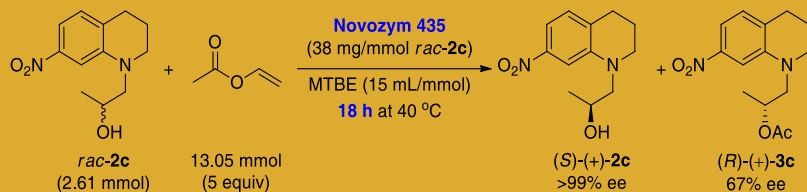

HPLC conditions [for (*S*)-**2c**]: *n*-hexane-*i*-PrOH (98:2, v/v); *f*=0.8 mL/min;  $\lambda$ =260 nm; Chiralcel OD-H

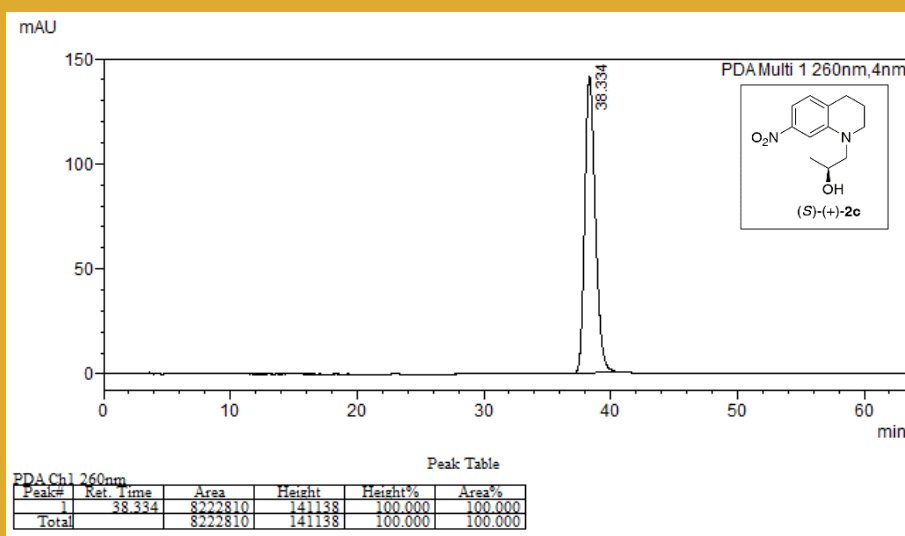

HPLC conditions [for (*R*)-**3c**]: *n*-hexane-*i*-PrOH (99:1, v/v); *f*=0.7 mL/min;  $\lambda$ =260 nm; Chiralcel OD-H

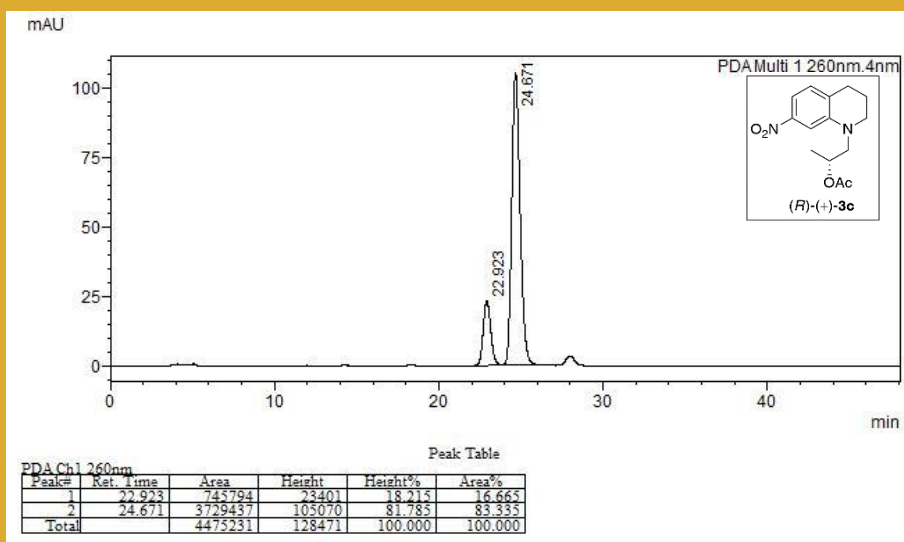

## HPLC analysis for the subsequent biocatalytic reaction:

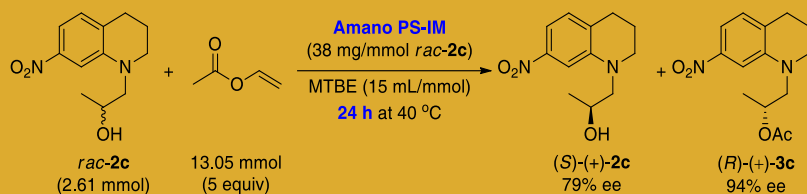

HPLC conditions [for (*S*)-**2c**]: *n*-hexane-*i*-PrOH (98:2, v/v); f=0.8 mL/min; λ=260 nm; Chiralcel OD-H

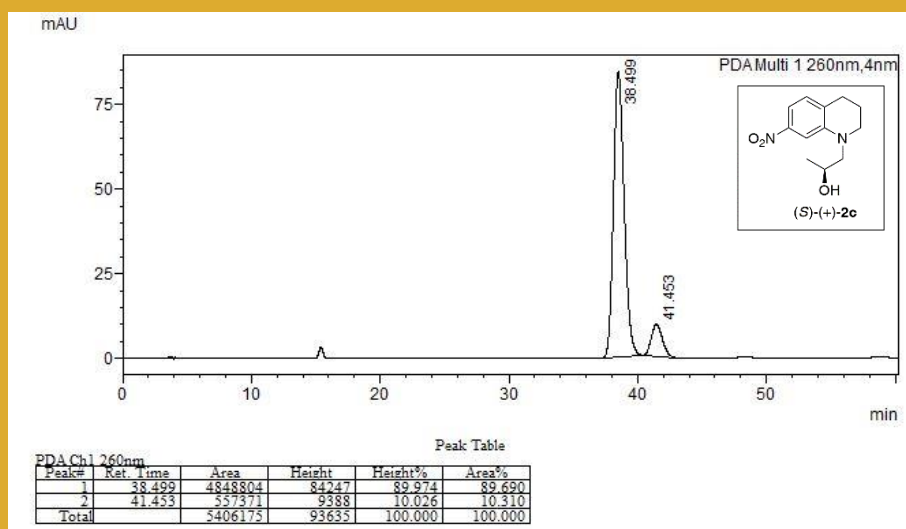

HPLC conditions [for (*R*)-**3c**]: *n*-hexane-*i*-PrOH (99:1, v/v); f=0.7 mL/min; λ=260 nm; Chiralcel OD-H

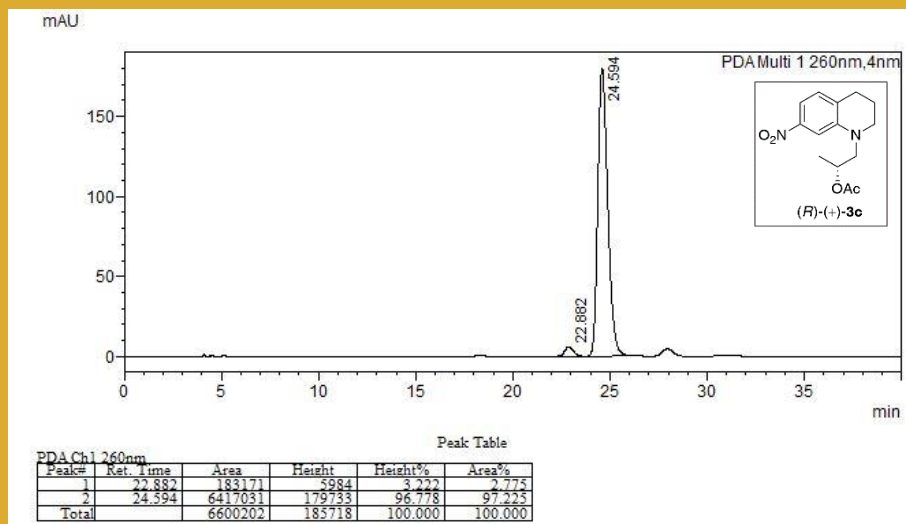



HPLC conditions [for *rac*-2a and *rac*-3a]: *n*-hexane-*i*-PrOH (90:10, v/v); *f*=0.8 mL/min;  $\lambda$ =260 nm; Chiralcel OJ-H

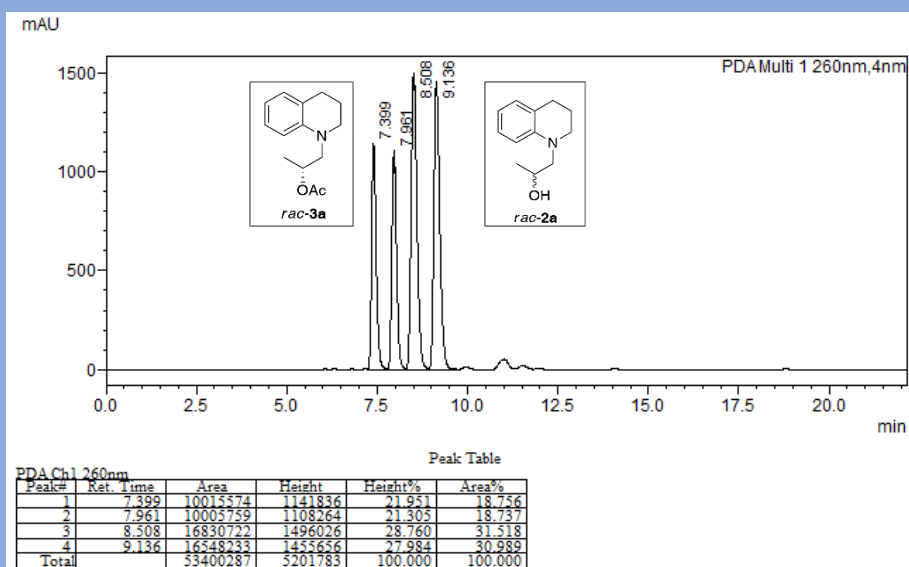

## HPLC analysis for the subsequent biocatalytic reaction:

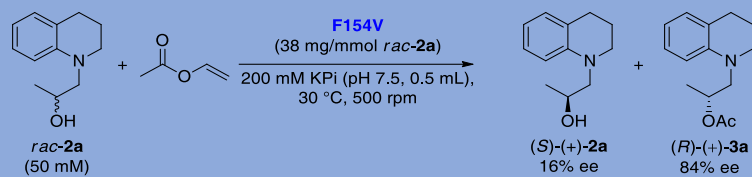

HPLC conditions [for (S)-2a and (R)-3a]: *n*-hexane-*i*-PrOH (90:10, v/v); *f*=0.8 mL/min;  $\lambda$ =260 nm; Chiralcel OJ-H

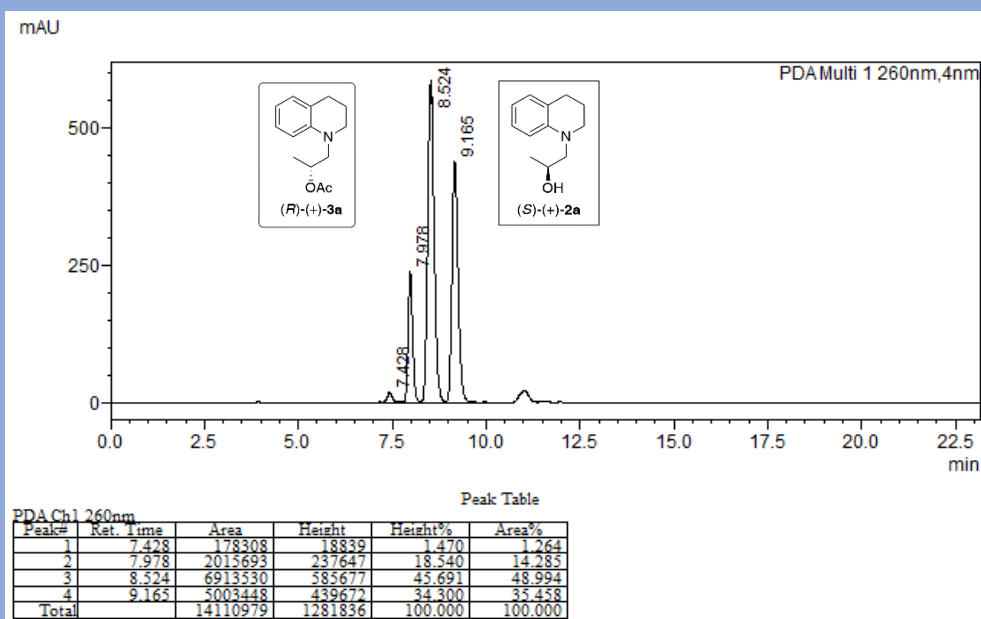

## HPLC analysis for the subsequent biocatalytic reaction:

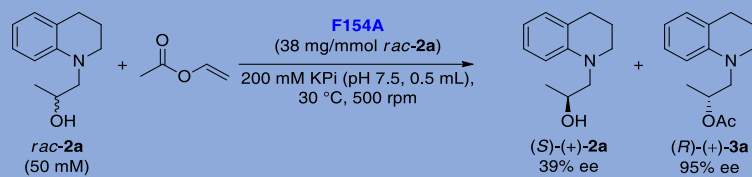

HPLC conditions [for (S)-2a and (R)-3a]: *n*-hexane-*i*-PrOH (90:10, v/v); *f*=0.8 mL/min;  $\lambda$ =260 nm; Chiralcel OJ-H

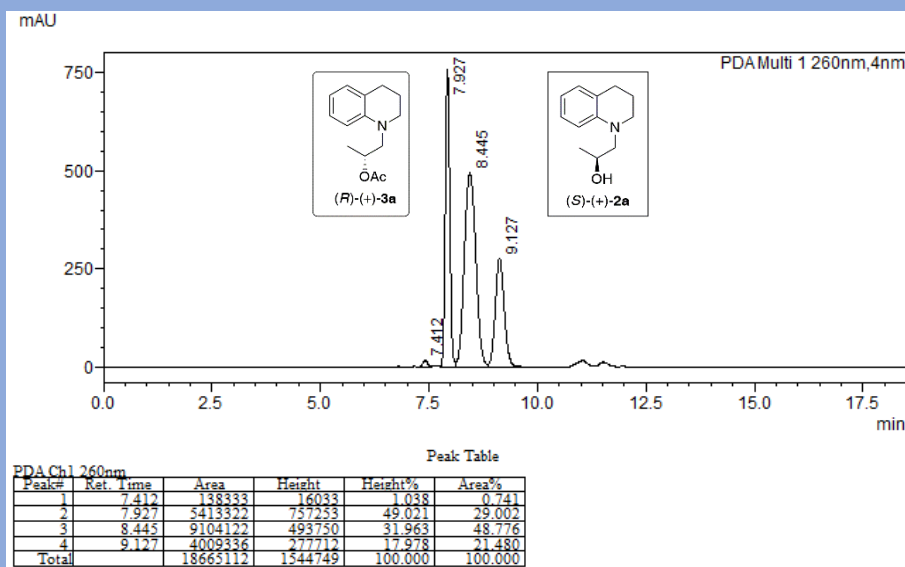

## HPLC analysis for the subsequent biocatalytic reaction:

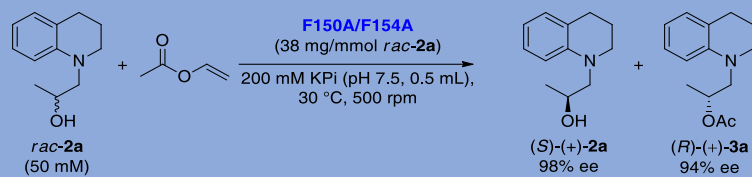

HPLC conditions [for (*S*)-2a and (*R*)-3a]: *n*-hexane-*i*-PrOH (90:10, v/v); *f*=0.8 mL/min;  $\lambda$ =260 nm; Chiralcel OJ-H

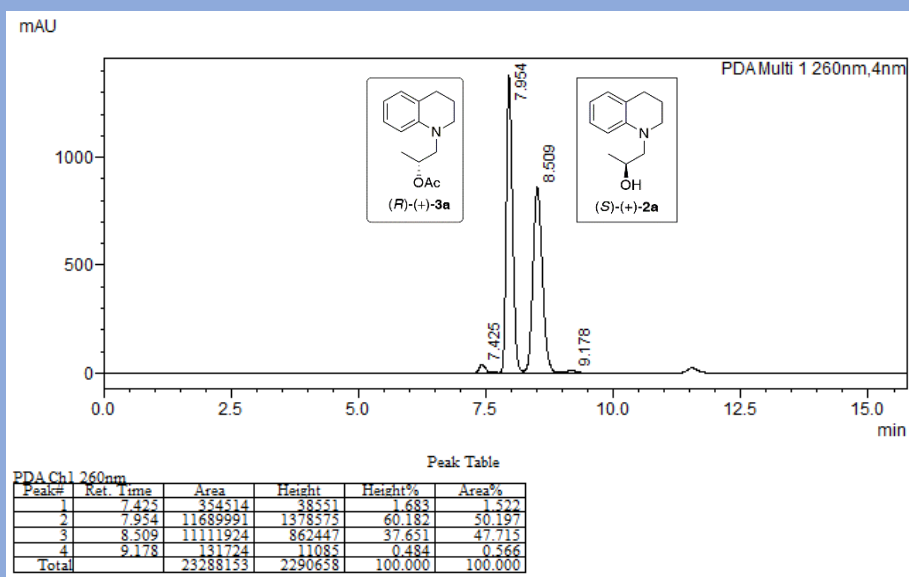

## HPLC analysis for the subsequent biocatalytic reaction:

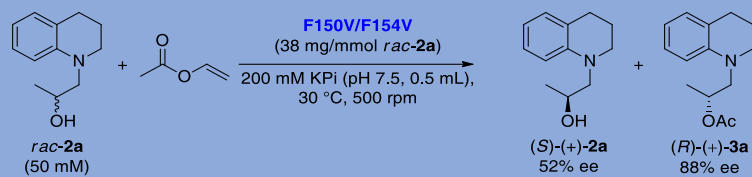

HPLC conditions [for (S)-2a and (R)-3a]: *n*-hexane-*i*-PrOH (90:10, v/v); *f*=0.8 mL/min;  $\lambda$ =260 nm; Chiralcel OJ-H

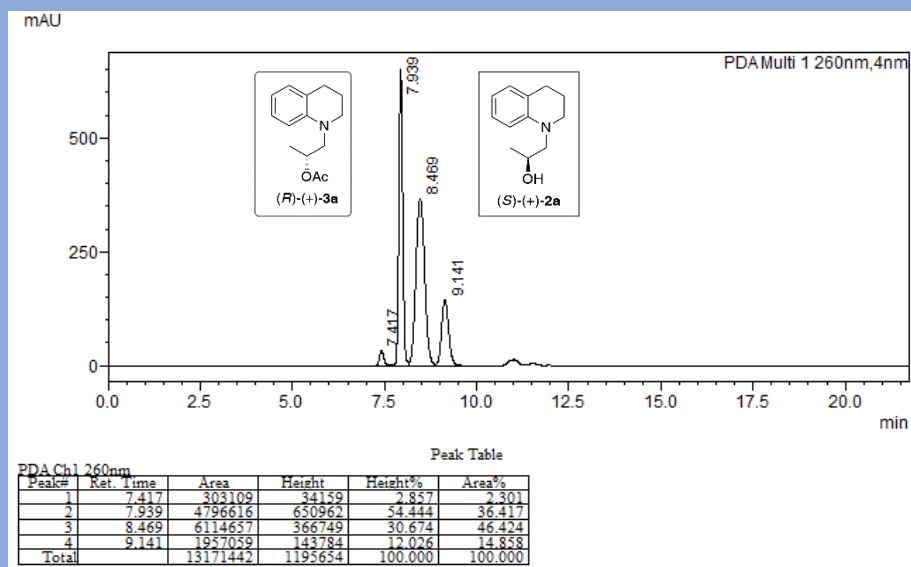

## HPLC analysis for the subsequent biocatalytic reaction:

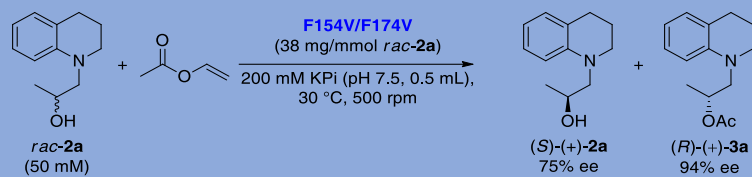

HPLC conditions [for (*S*)-2a and (*R*)-3a]: *n*-hexane-*i*-PrOH (90:10, v/v); *f*=0.8 mL/min;  $\lambda$ =260 nm; Chiralcel OJ-H

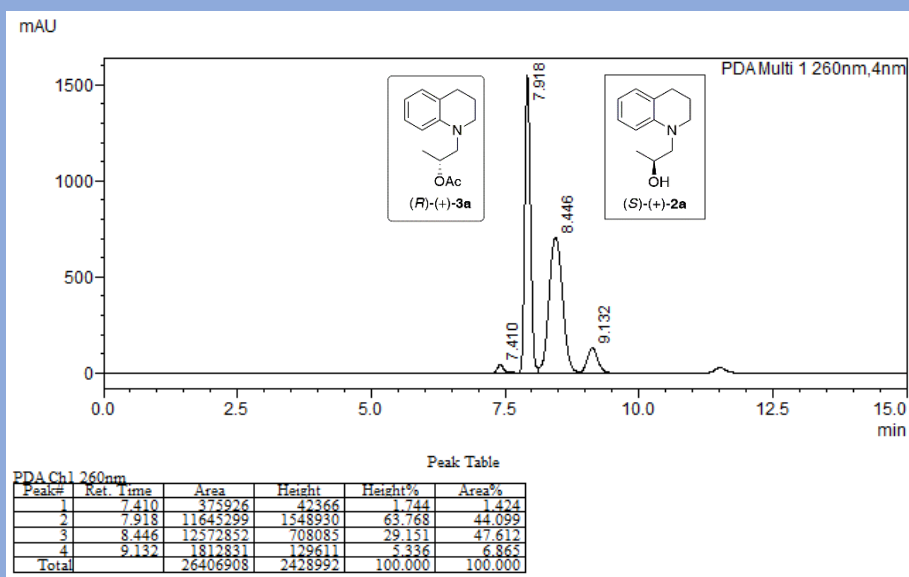

HPLC conditions [for *rac*-2b and *rac*-3b]: *n*-hexane-*i*-PrOH (97:3, v/v); *f*=0.8 mL/min;  $\lambda$ =260 nm; Chiralcel OJ-H

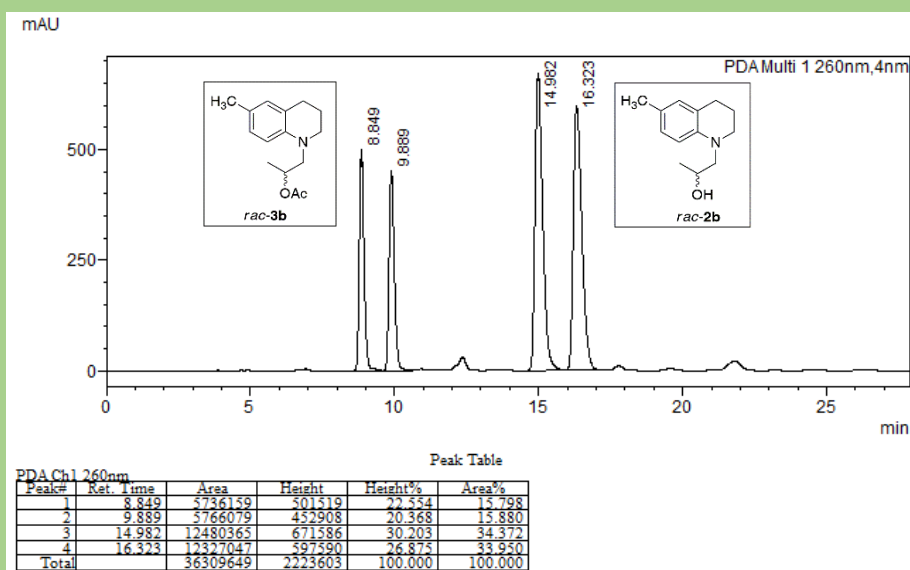

## HPLC analysis for the subsequent biocatalytic reaction:

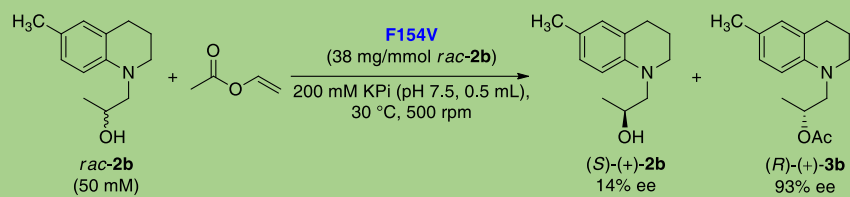

HPLC conditions [for (*S*)-**2b** and (*R*)-**3b**]: *n*-hexane-*i*-PrOH (97:3, v/v); *f*=0.8 mL/min;  $\lambda$ =260 nm; Chiralcel OJ-H

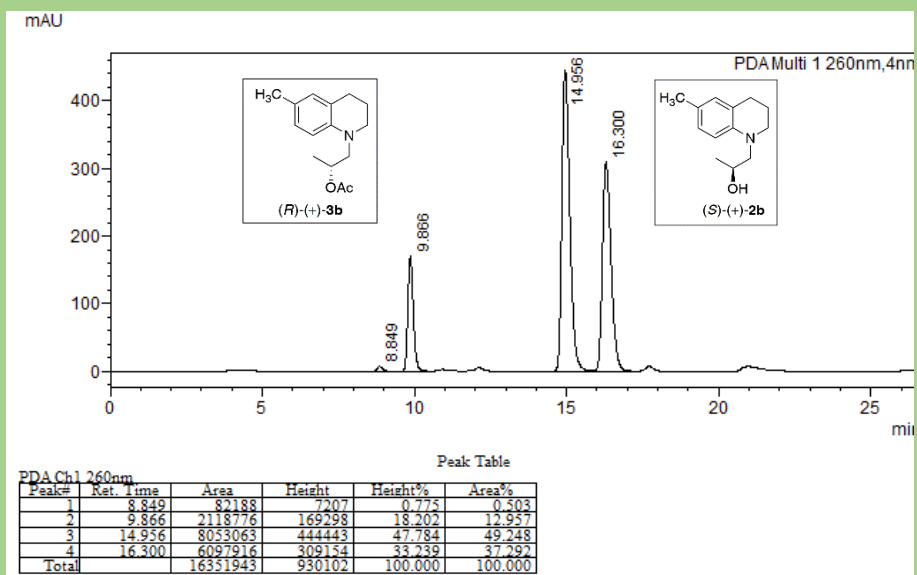



## HPLC analysis for the subsequent biocatalytic reaction:

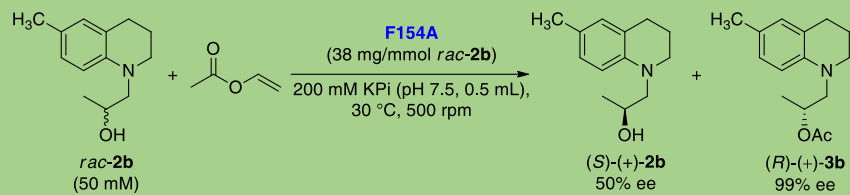

HPLC conditions [for (S)-**2b** and (R)-**3b**]: *n*-hexane-*i*-PrOH (97:3, v/v); *f*=0.8 mL/min;  $\lambda$ =260 nm; Chiralcel OJ-H

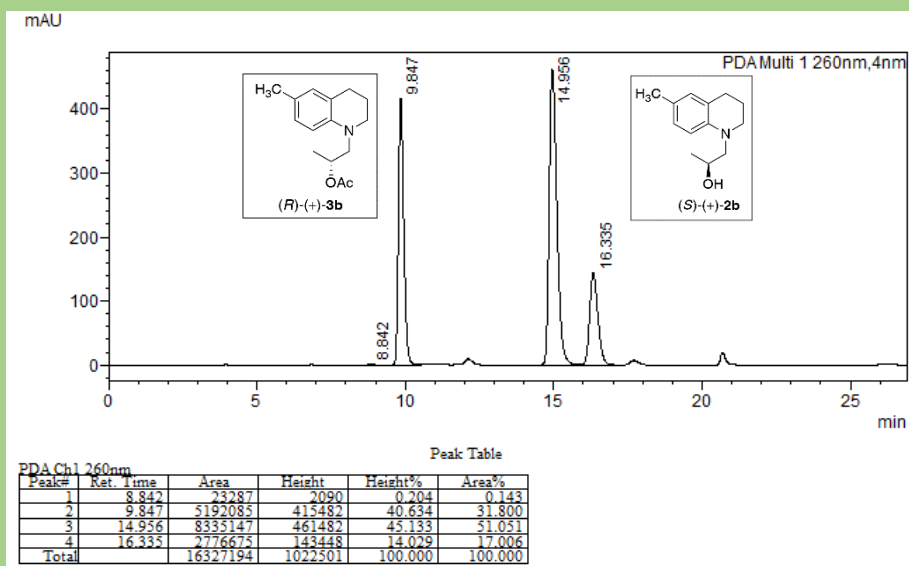

## HPLC analysis for the subsequent biocatalytic reaction:

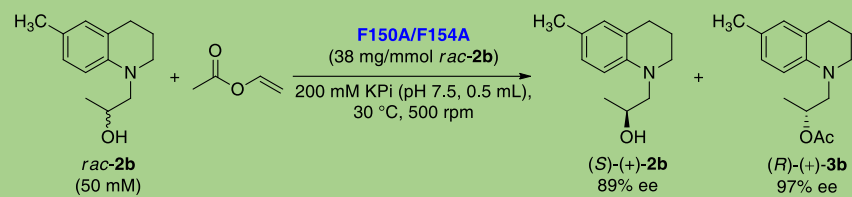

HPLC conditions [for (S)-**2b** and (R)-**3b**]: *n*-hexane-*i*-PrOH (97:3, v/v); *f*=0.8 mL/min;  $\lambda$ =260 nm; Chiralcel OJ-H

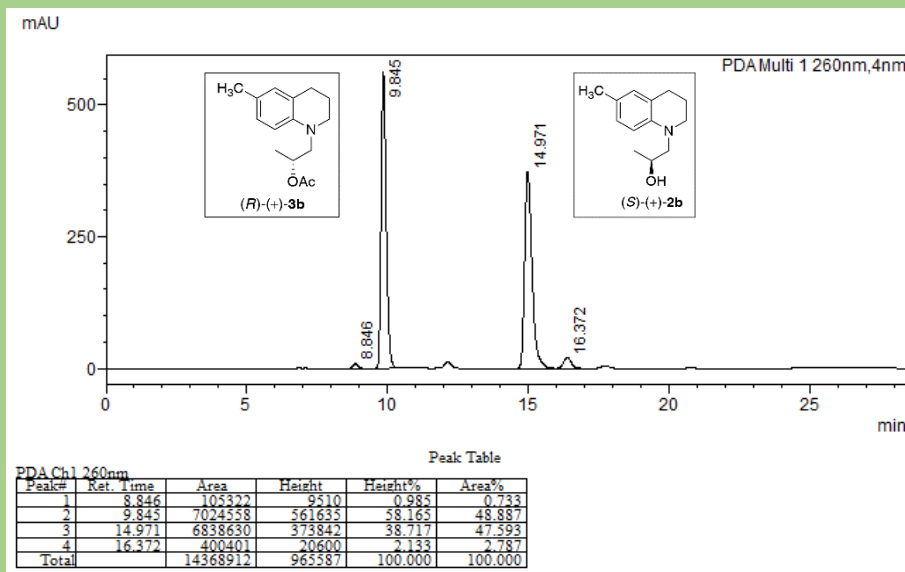

## HPLC analysis for the subsequent biocatalytic reaction:

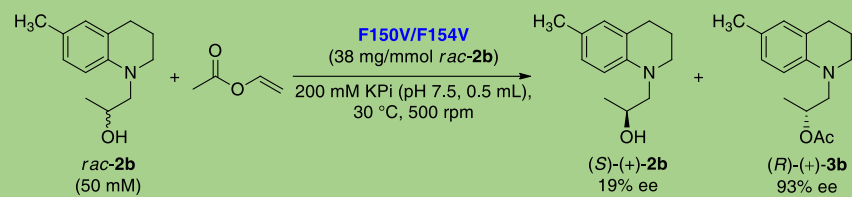

HPLC conditions [for (S)-**2b** and (R)-**3b**]: *n*-hexane-*i*-PrOH (97:3, v/v); *f*=0.8 mL/min;  $\lambda$ =260 nm; Chiralcel OJ-H

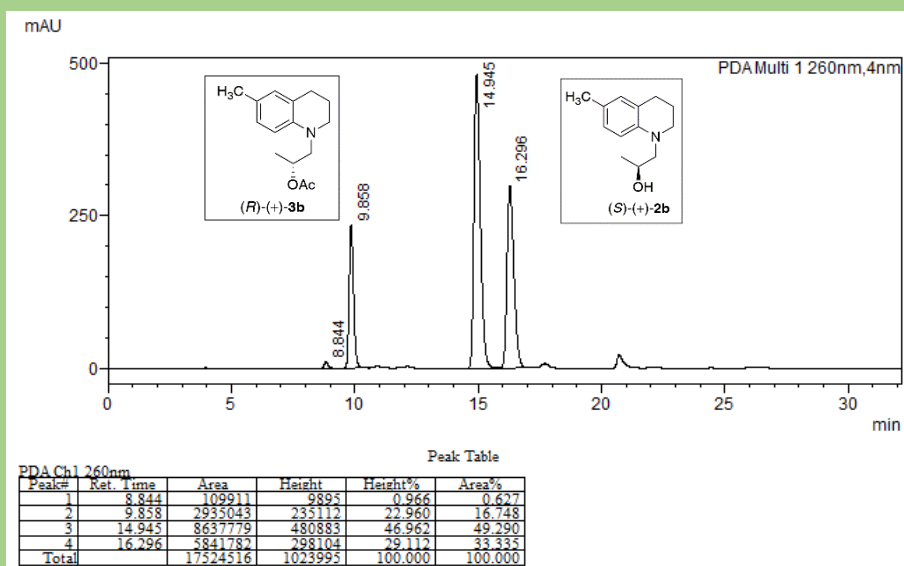

## HPLC analysis for the subsequent biocatalytic reaction:

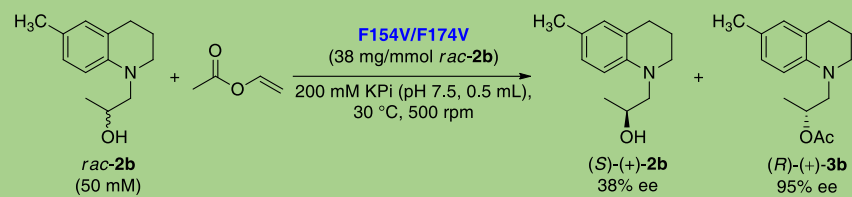

HPLC conditions [for (S)-**2b** and (R)-**3b**]: *n*-hexane-*i*-PrOH (97:3, v/v); *f*=0.8 mL/min;  $\lambda$ =260 nm; Chiralcel OJ-H

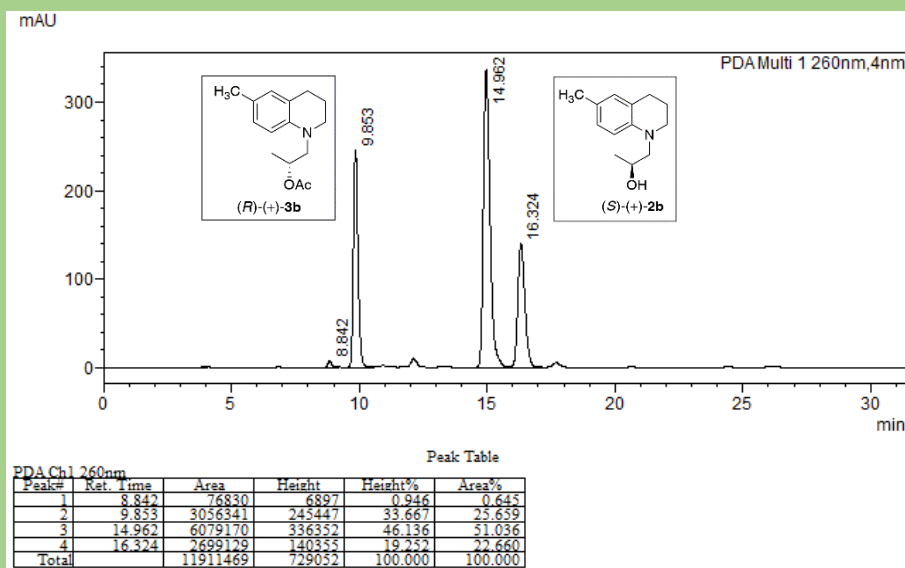

HPLC conditions [for *rac*-2c and *rac*-3c]: 0-25 min: *n*-hexane-*i*-PrOH (99:1, v/v); f=0.7 mL/min; 25-70 min: *n*-hexane-*i*-PrOH (98:2, v/v); f=0.8 mL/min;  $\lambda$ =260 nm; Chiralcel OD-H

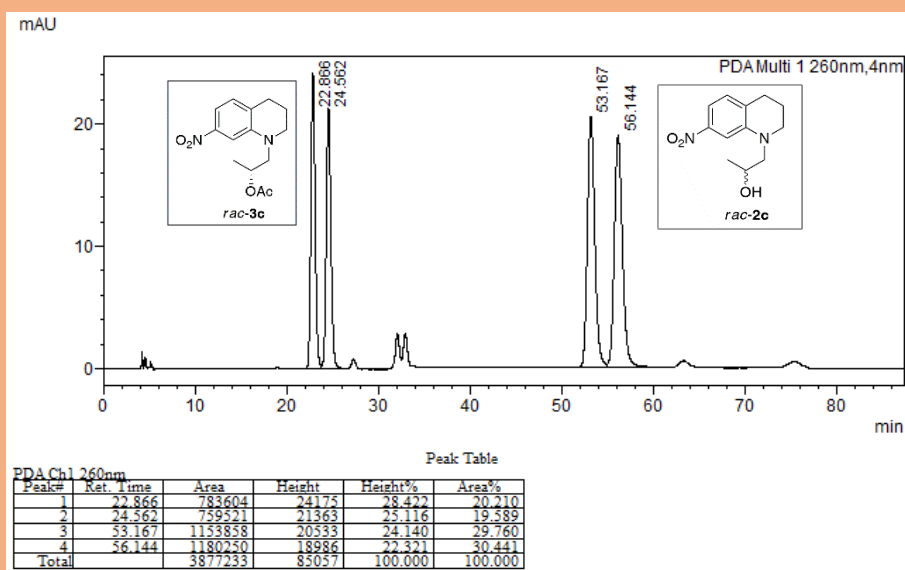

## HPLC analysis for the subsequent biocatalytic reaction:

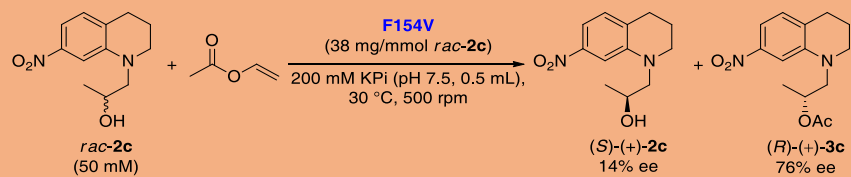

HPLC conditions [for (*S*)-**2c** and (*R*)-**3c**]: 0-25 min: *n*-hexane-*i*-PrOH (99:1, v/v); f=0.7 mL/min; 25-70 min: *n*-hexane-*i*-PrOH (98:2, v/v); f=0.8 mL/min; λ=260 nm; Chiralcel OD-H

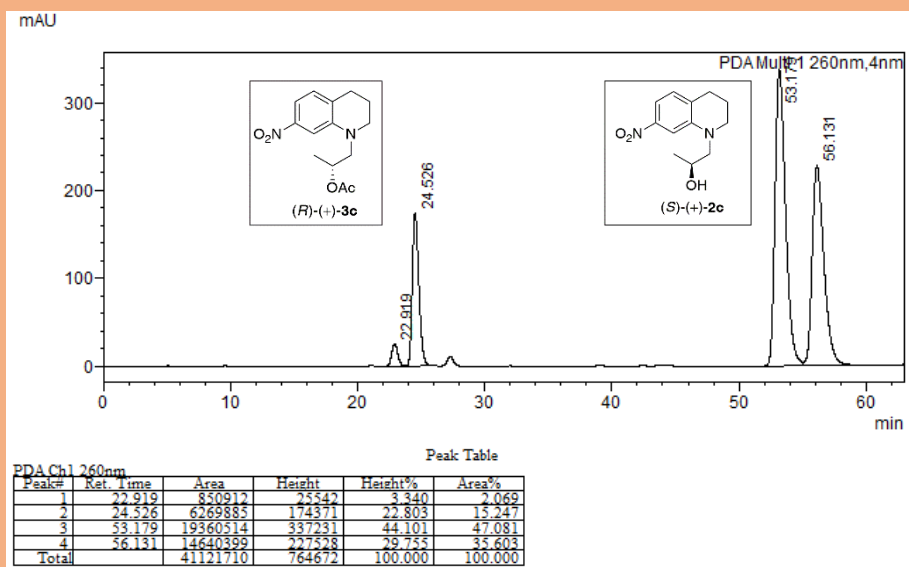

## HPLC analysis for the subsequent biocatalytic reaction:

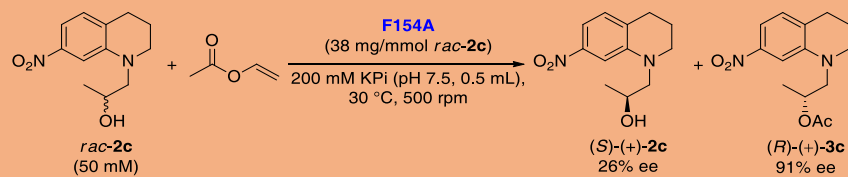

HPLC conditions [for  $(S)\text{-2c}$  and  $(R)\text{-3c}$ ]: 0-25 min: *n*-hexane-*i*-PrOH (99:1, v/v); f=0.7 mL/min; 25-70 min: *n*-hexane-*i*-PrOH (98:2, v/v); f=0.8 mL/min;  $\lambda$ =260 nm; Chiralcel OD-H

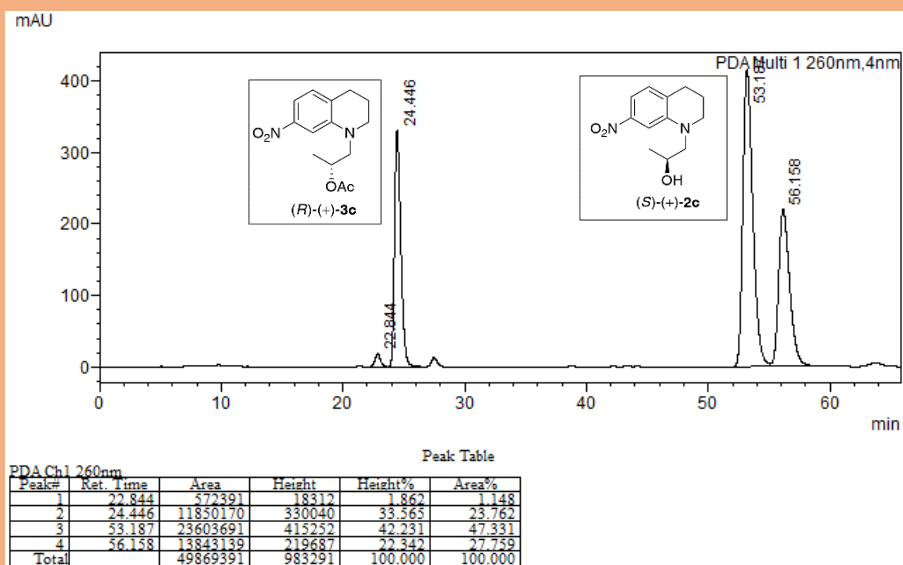

## HPLC analysis for the subsequent biocatalytic reaction:

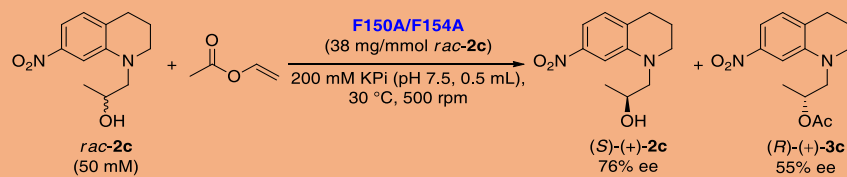

HPLC conditions [for (*S*)-**2c** and (*R*)-**3c**]: 0-25 min: *n*-hexane-*i*-PrOH (99:1, v/v); f=0.7 mL/min; 25-70 min: *n*-hexane-*i*-PrOH (98:2, v/v); f=0.8 mL/min; λ=260 nm; Chiralcel OD-H

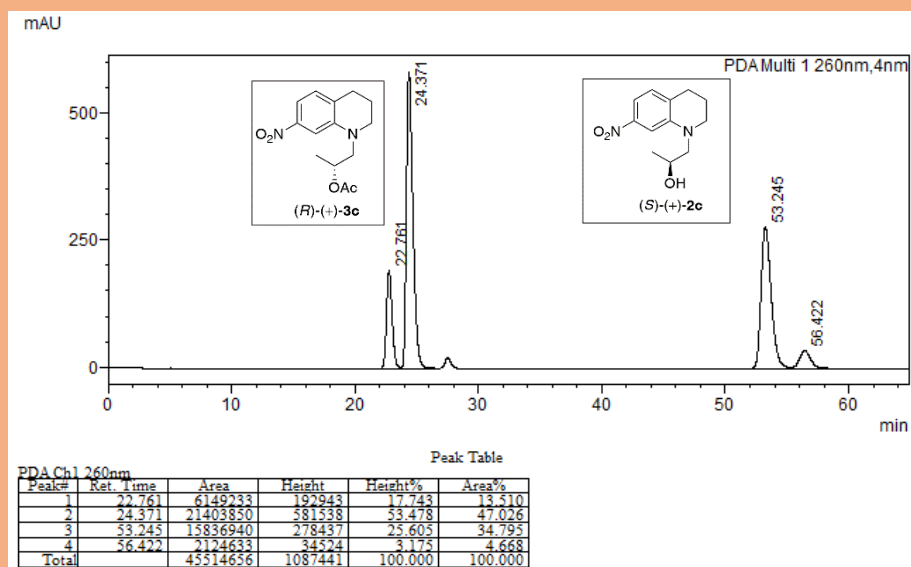



## HPLC analysis for the subsequent biocatalytic reaction:

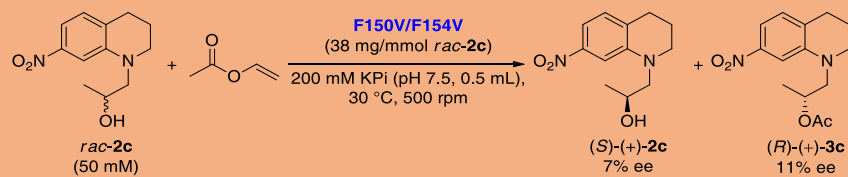

HPLC conditions [for (*S*)-**2c** and (*R*)-**3c**]: 0-25 min: *n*-hexane-*i*-PrOH (99:1, v/v); f=0.7 mL/min; 25-70 min: *n*-hexane-*i*-PrOH (98:2, v/v); f=0.8 mL/min; λ=260 nm; Chiralcel OD-H

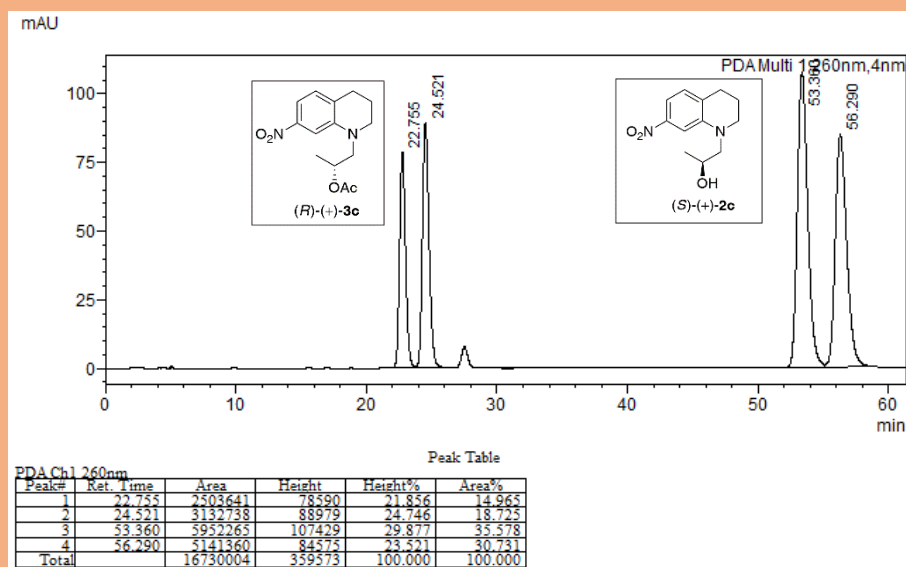

## HPLC analysis for the subsequent biocatalytic reaction:

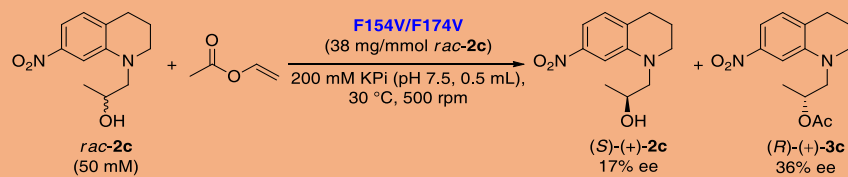

HPLC conditions [for  $(S)\text{-2c}$  and  $(R)\text{-3c}$ ]: 0-25 min: *n*-hexane-*i*-PrOH (99:1, v/v); f=0.7 mL/min; 25-70 min: *n*-hexane-*i*-PrOH (98:2, v/v); f=0.8 mL/min;  $\lambda$ =260 nm; Chiralcel OD-H

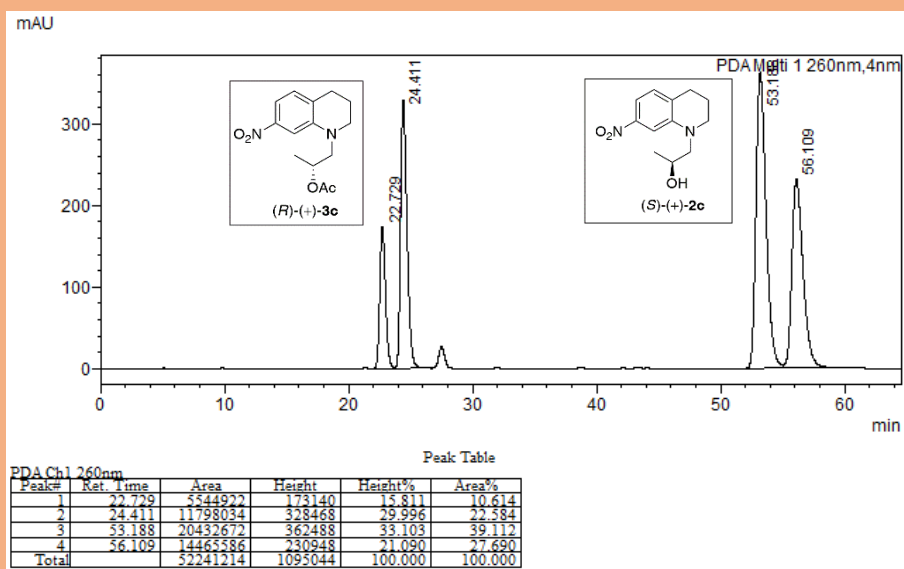

***1-(3,4-Dihydroquinolin-1(2H)-yl)propan-2-ol (rac-2a)***

<sup>1</sup>H NMR spectrum of *rac-2a* (500 MHz, CDCl<sub>3</sub>)

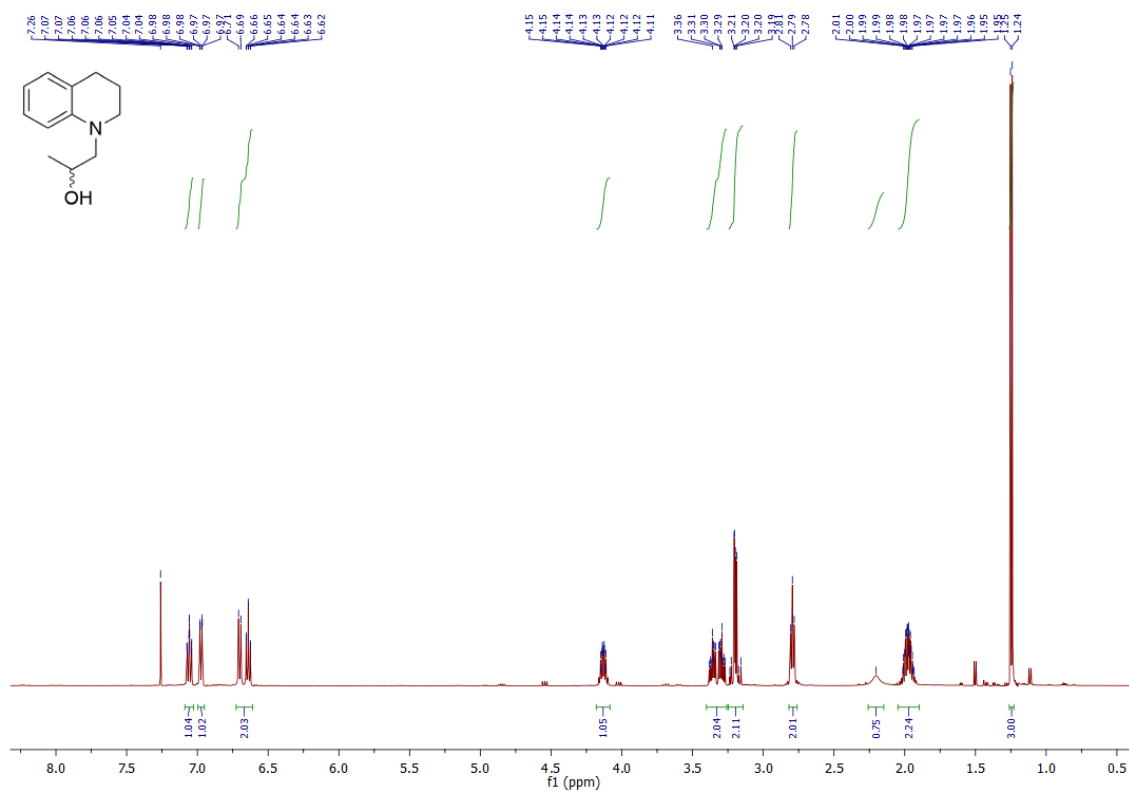

<sup>13</sup>C NMR spectrum of *rac-2a* (126 MHz, CDCl<sub>3</sub>)

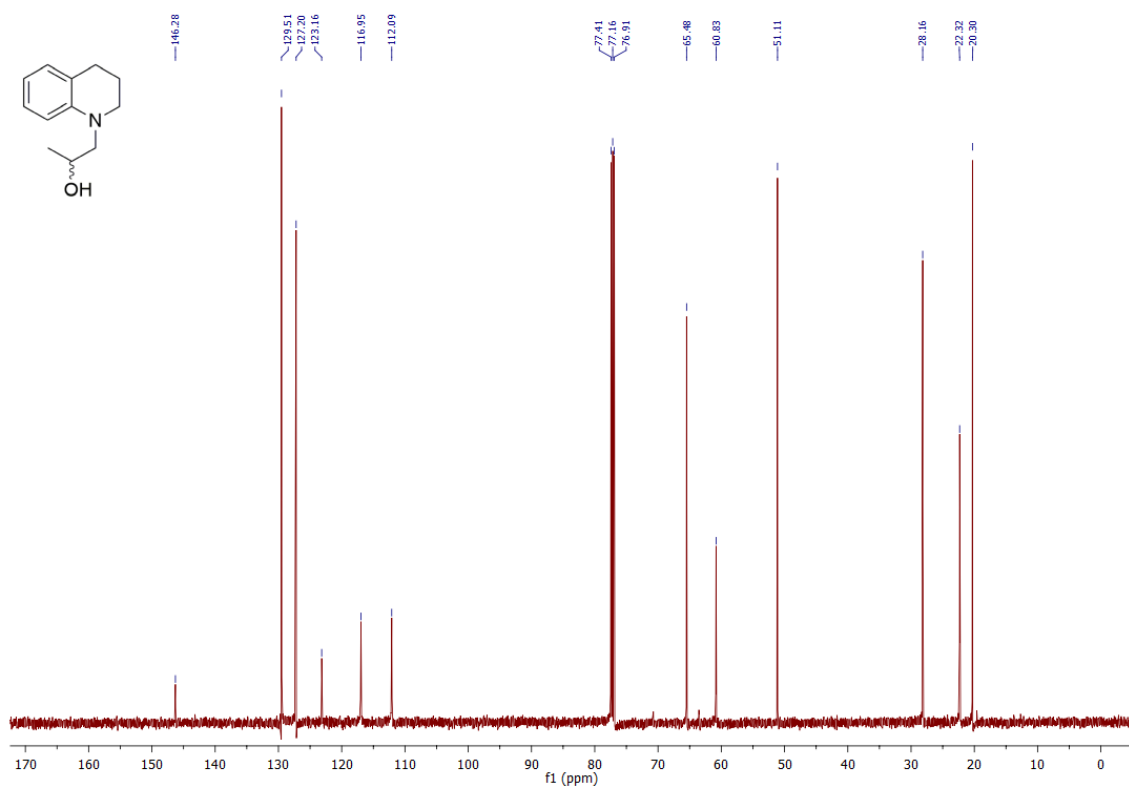

# FTMS spectrum of *rac-2a* (ESI-TOF)

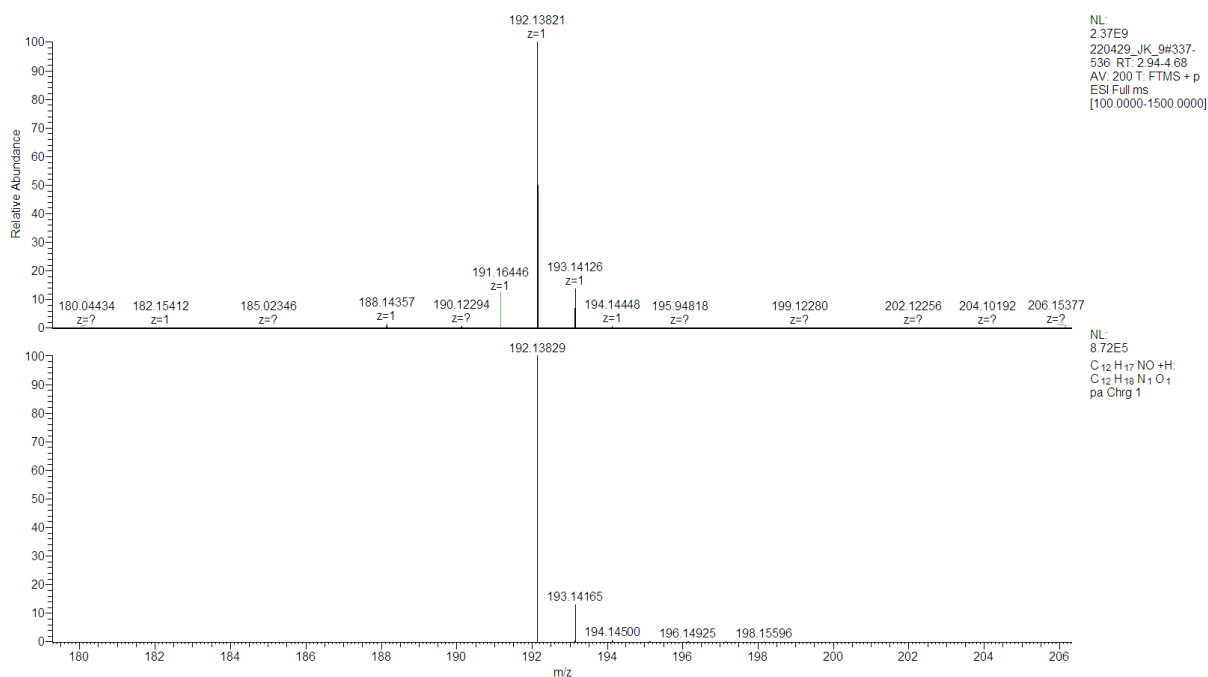

# IR spectrum of *rac-2a* (Mineral oil, Nujol)

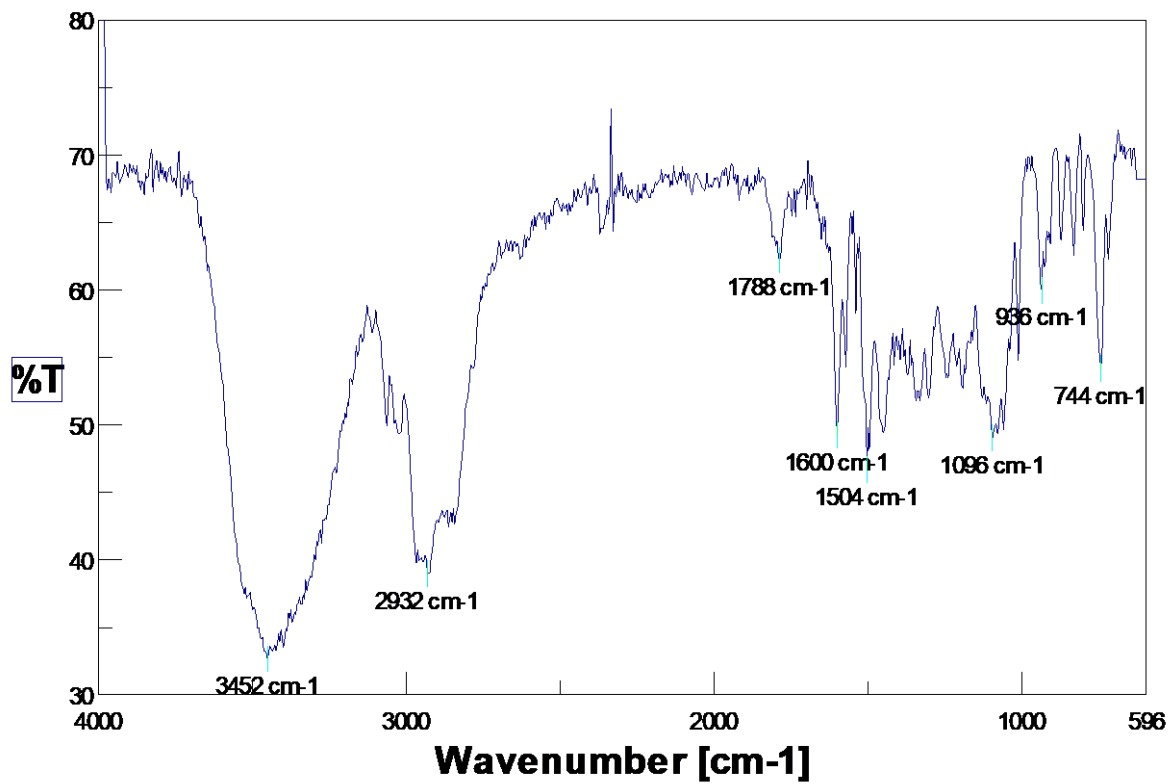

***1-(6-Methyl-3,4-dihydroquinolin-1(2H)-yl)propan-2-ol (rac-2b)***

<sup>1</sup>H NMR spectrum of *rac-2b* (500 MHz, CDCl<sub>3</sub>)

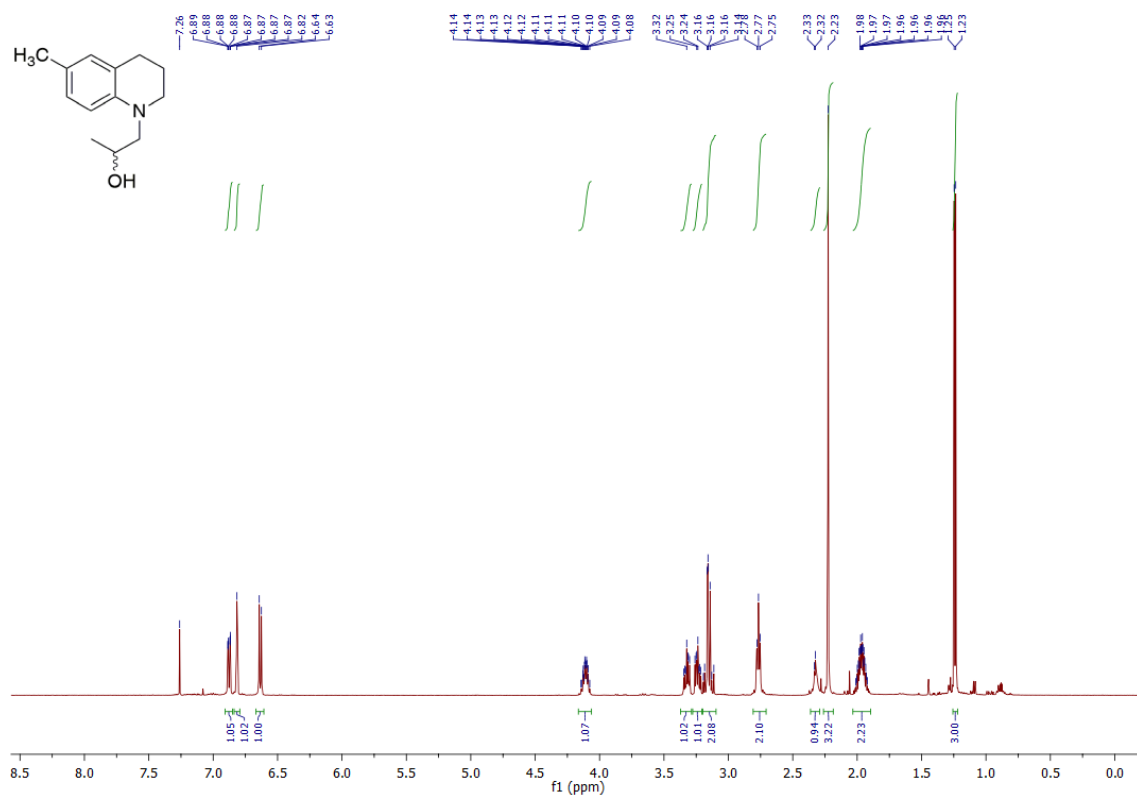

<sup>13</sup>C NMR spectrum of *rac-2b* (126 MHz, CDCl<sub>3</sub>)

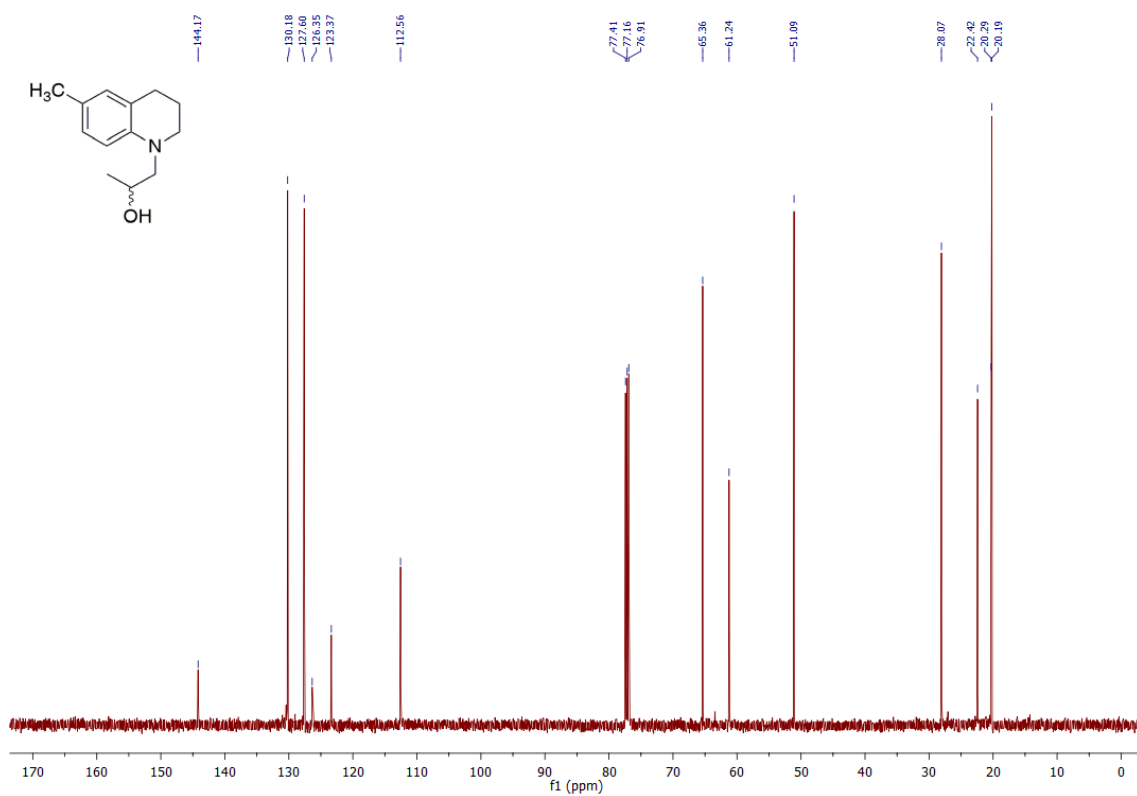

# FTMS spectrum of *rac*-**2b** (ESI-TOF)

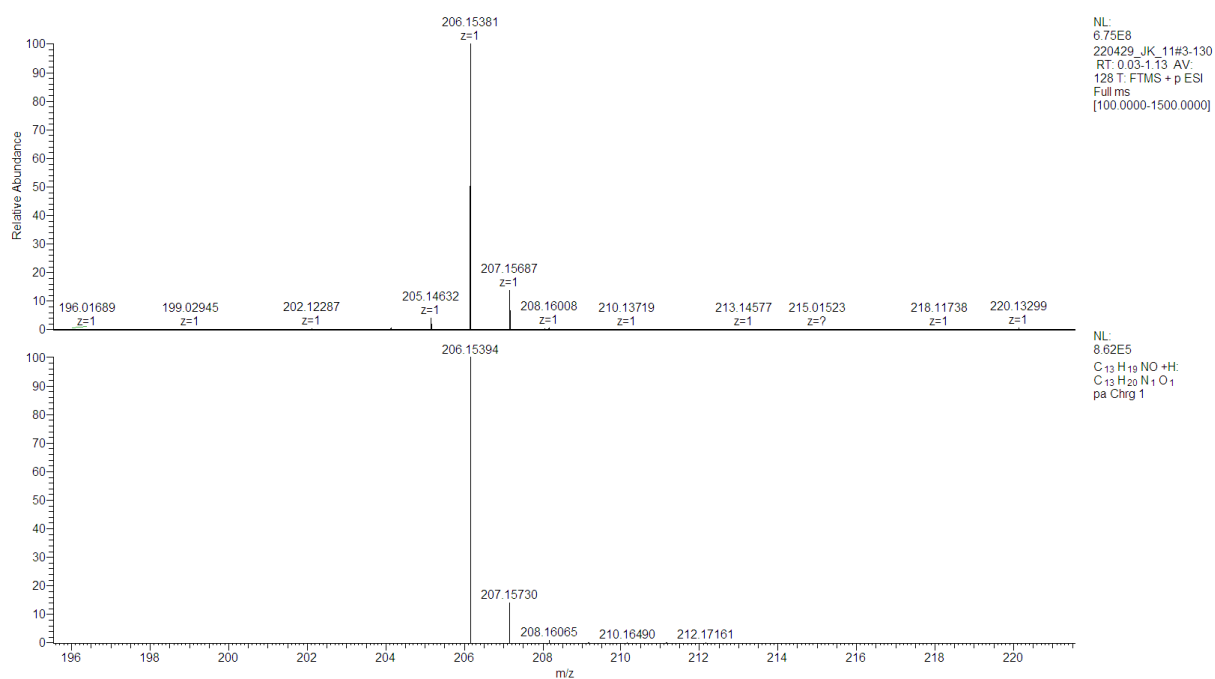

## IR spectrum of *rac*-**2b** (Mineral oil, Nujol)

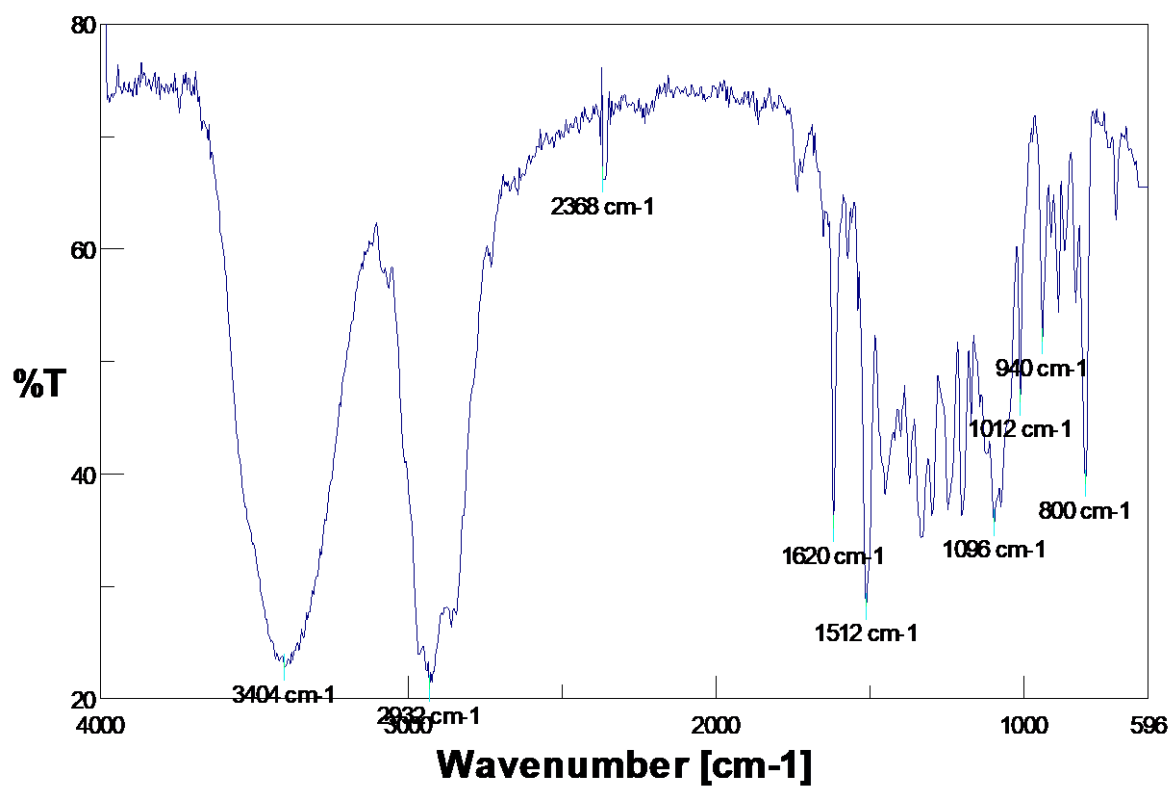



# FTMS spectrum of *rac-2c* (ESI-TOF)

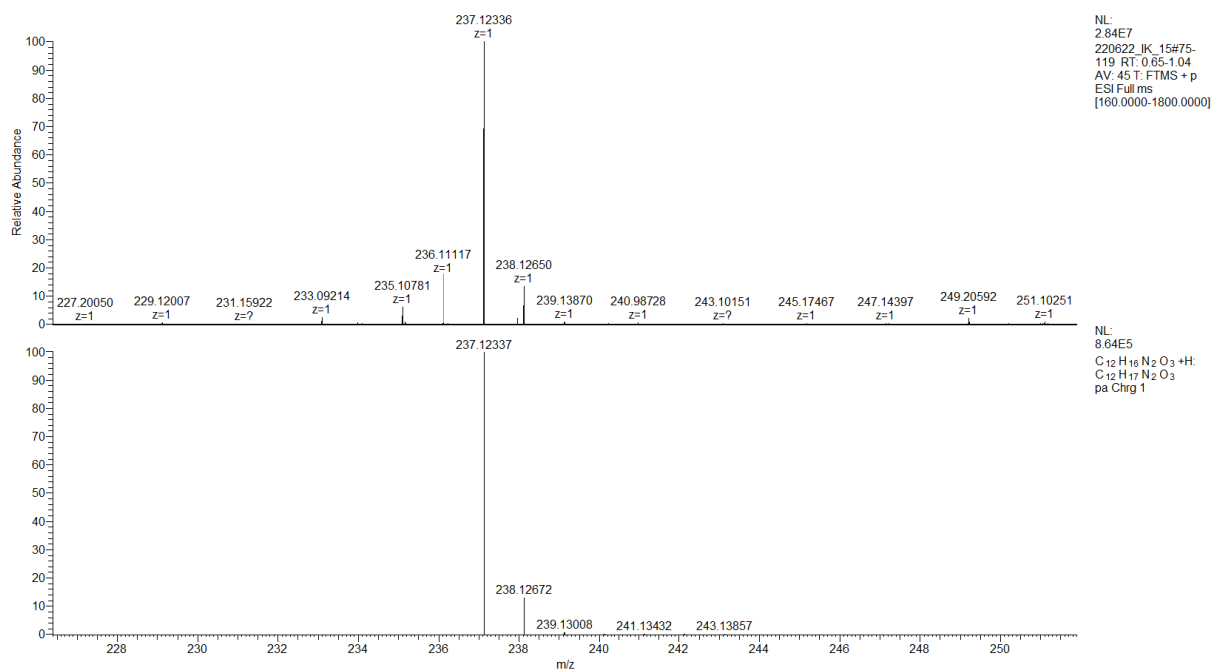

# IR spectrum of *rac-2c* (Mineral oil, Nujol)

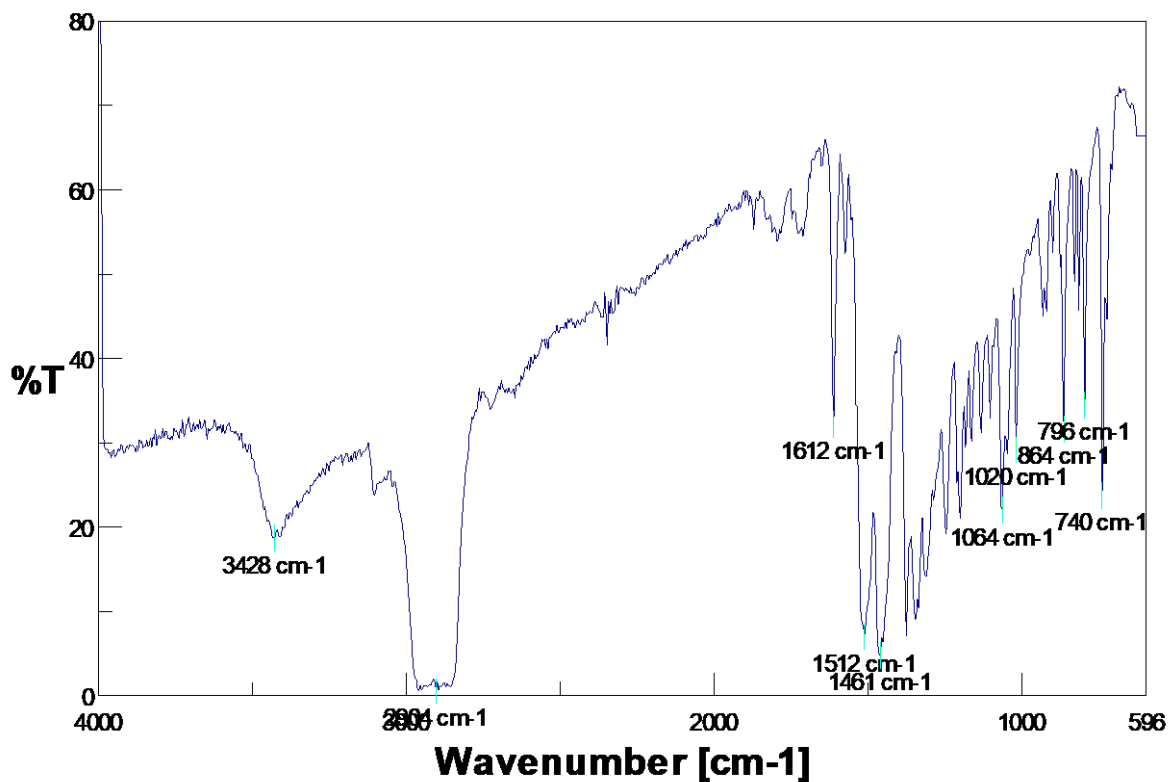



***1-(3,4-Dihydroquinolin-1(2H)-yl)propan-2-yl acetate (rac-3a)***

<sup>1</sup>H NMR spectrum of *rac-3a* (500 MHz, CDCl<sub>3</sub>)

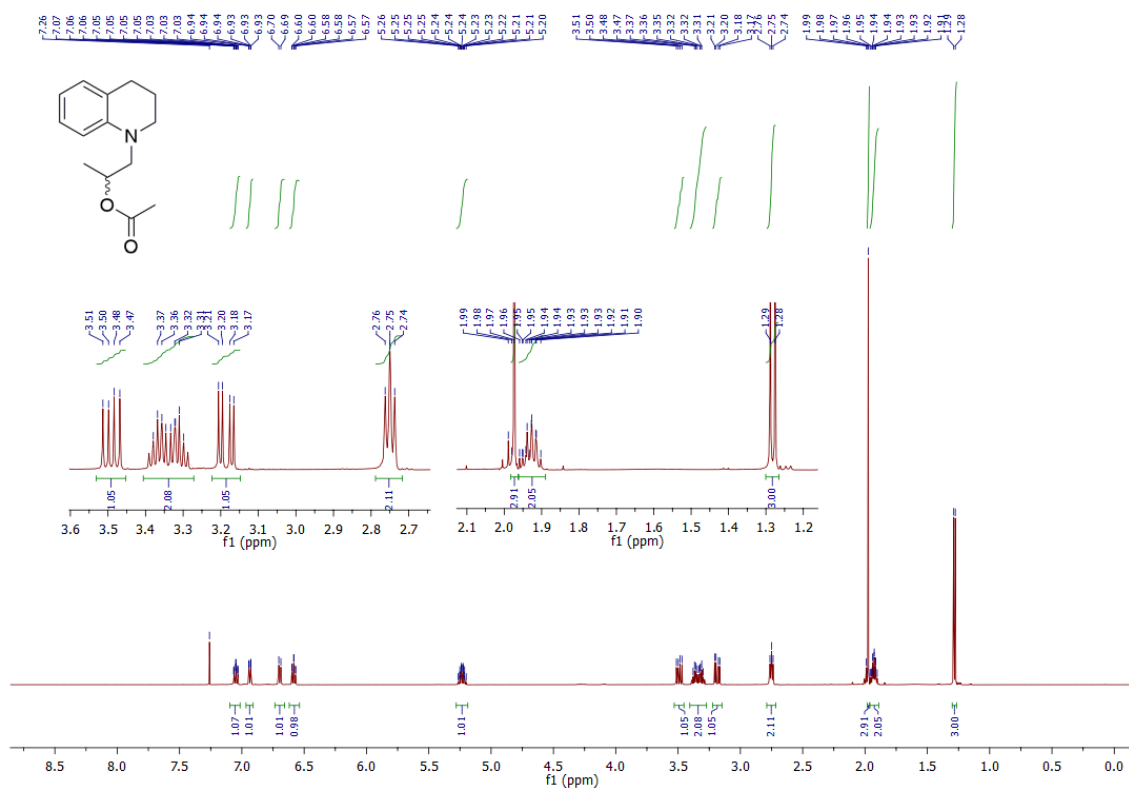

<sup>13</sup>C NMR spectrum of *rac-3a* (126 MHz, CDCl<sub>3</sub>)

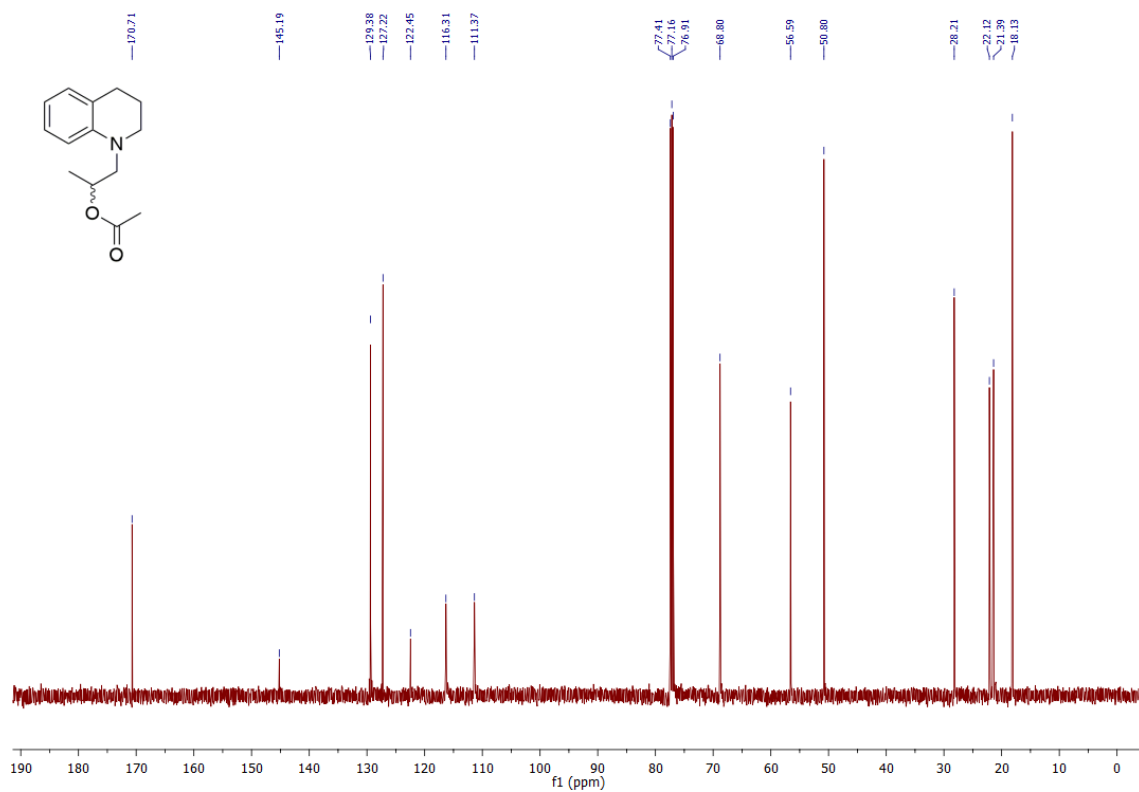

# FTMS spectrum of *rac*-**3a** (ESI-TOF)

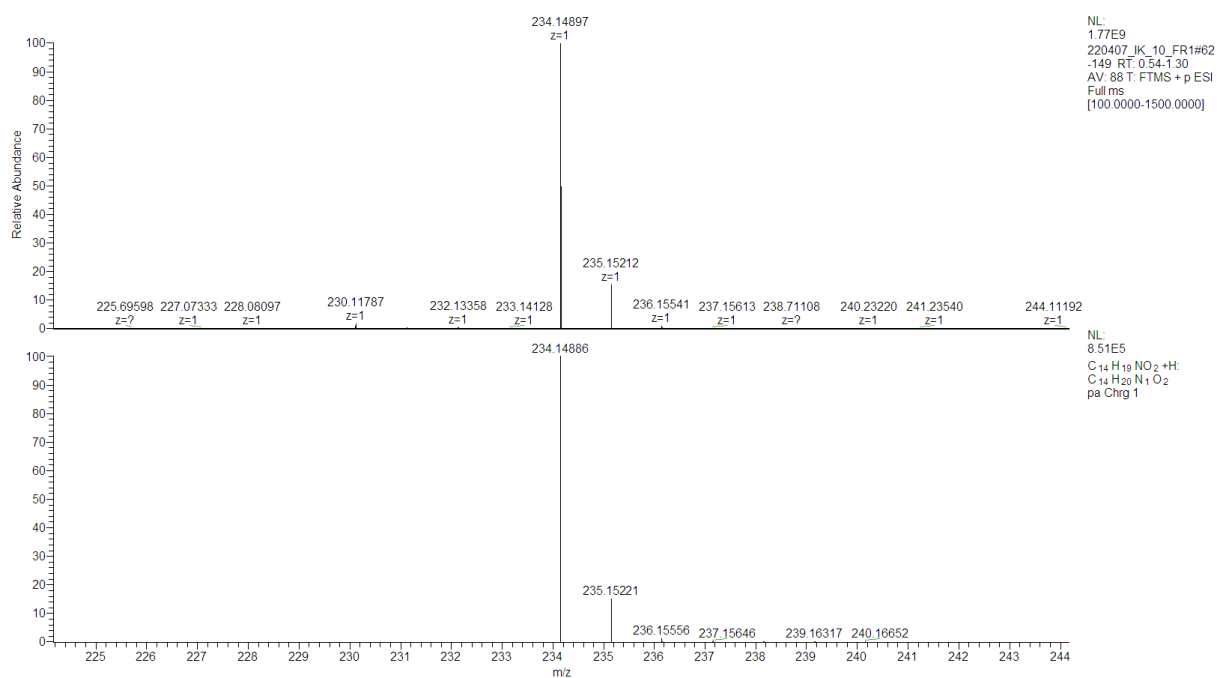

# IR spectrum of *rac*-**3a** (Mineral oil, Nujol)

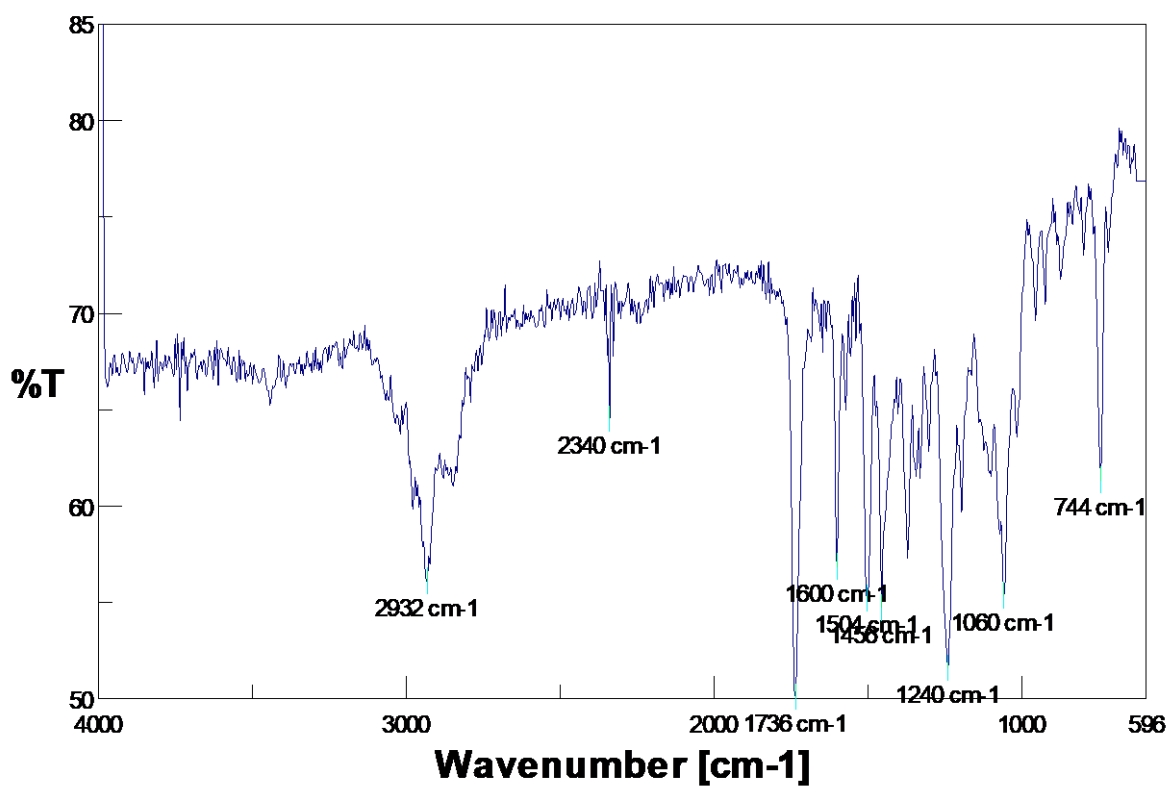

***1-(6-Methyl-3,4-dihydroquinolin-1(2H)-yl)propan-2-yl acetate (rac-3b)***

<sup>1</sup>H NMR spectrum of *rac-3b* (500 MHz, CDCl<sub>3</sub>)

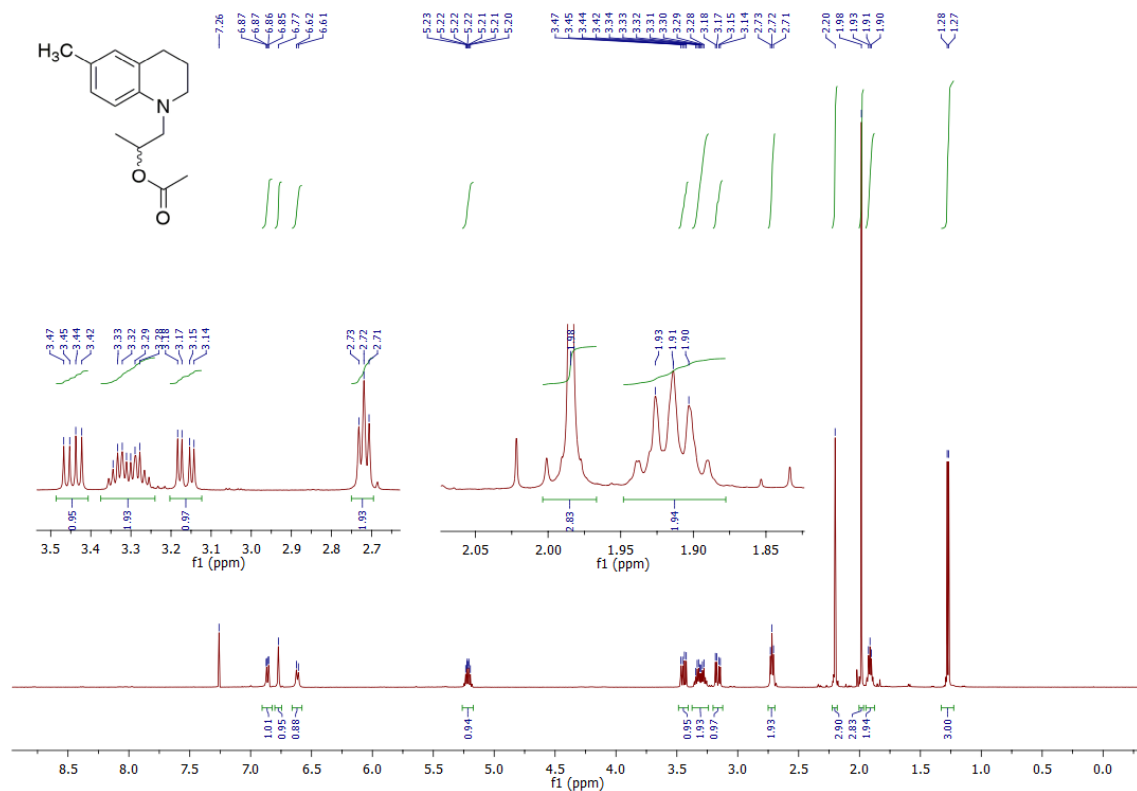

<sup>13</sup>C NMR spectrum of *rac-3b* (126 MHz, CDCl<sub>3</sub>)

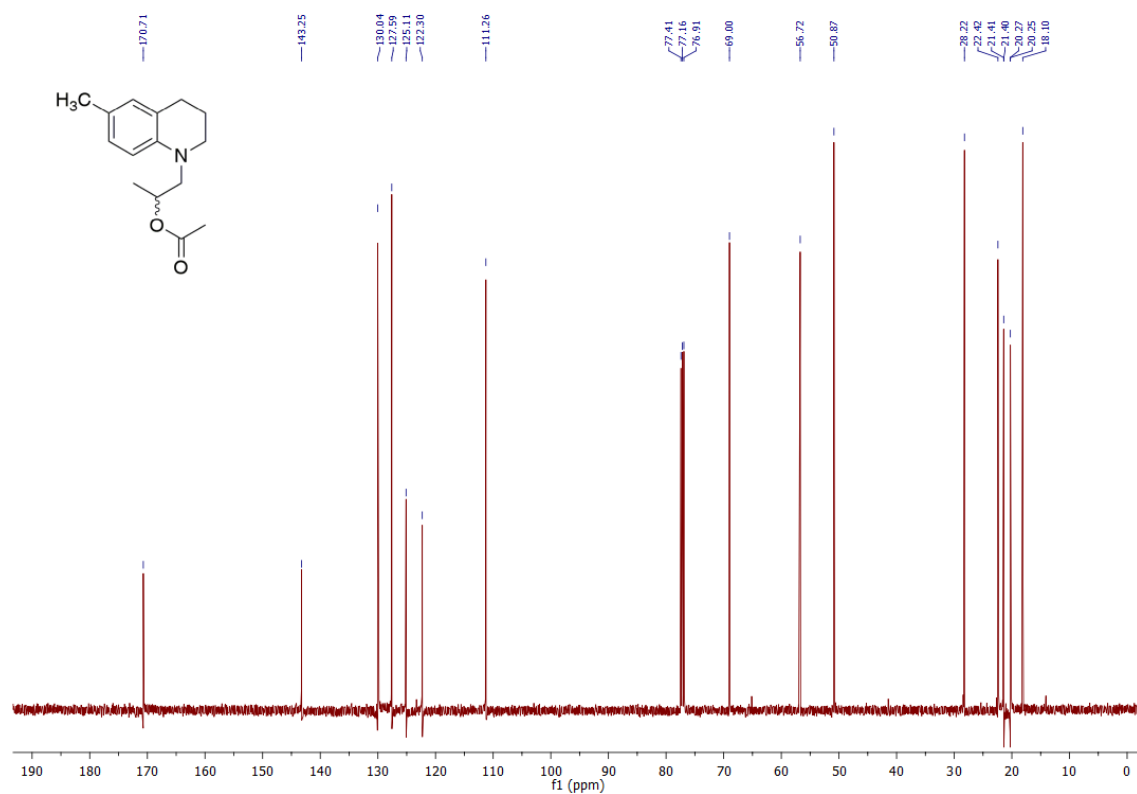

# FTMS spectrum of *rac*-**3b** (ESI-TOF)

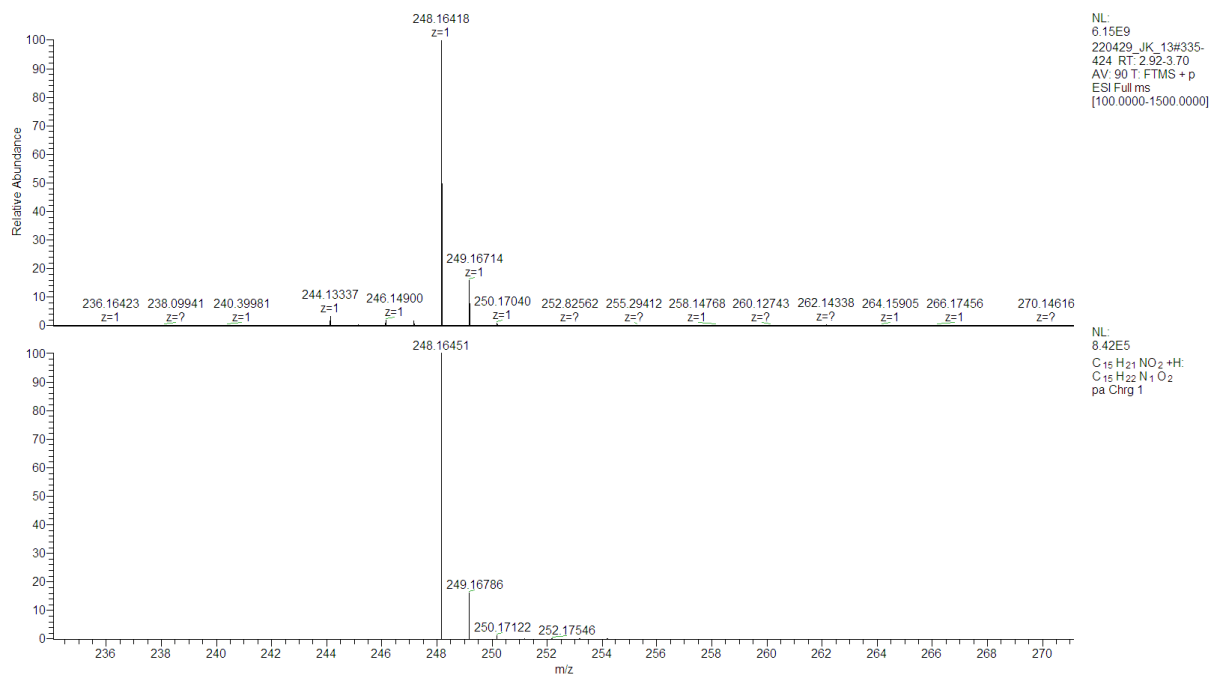

# IR spectrum of *rac*-**3b** (Mineral oil, Nujol)

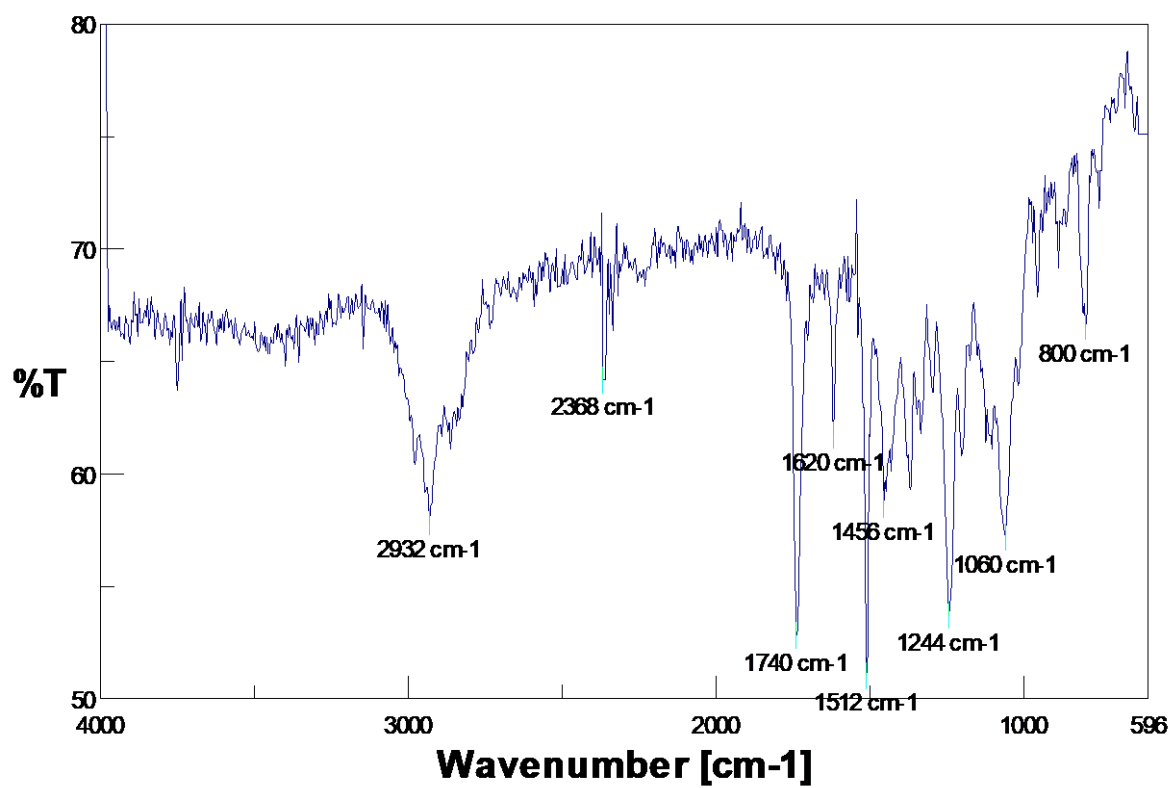

***1-(7-Nitro-3,4-dihydroquinolin-1(2H)-yl)propan-2-yl acetate (rac-3c)***

<sup>1</sup>H NMR spectrum of *rac-3c* (500 MHz, CDCl<sub>3</sub>)

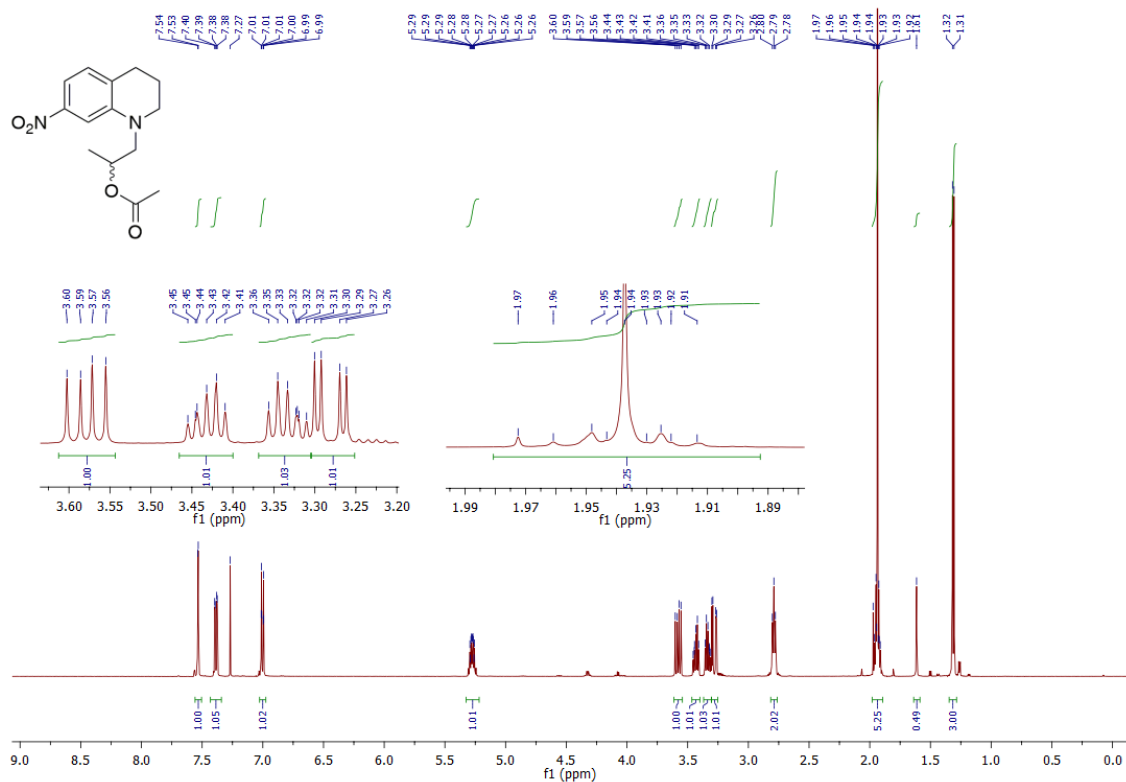

<sup>13</sup>C NMR spectrum of *rac-3c* (126 MHz, CDCl<sub>3</sub>)

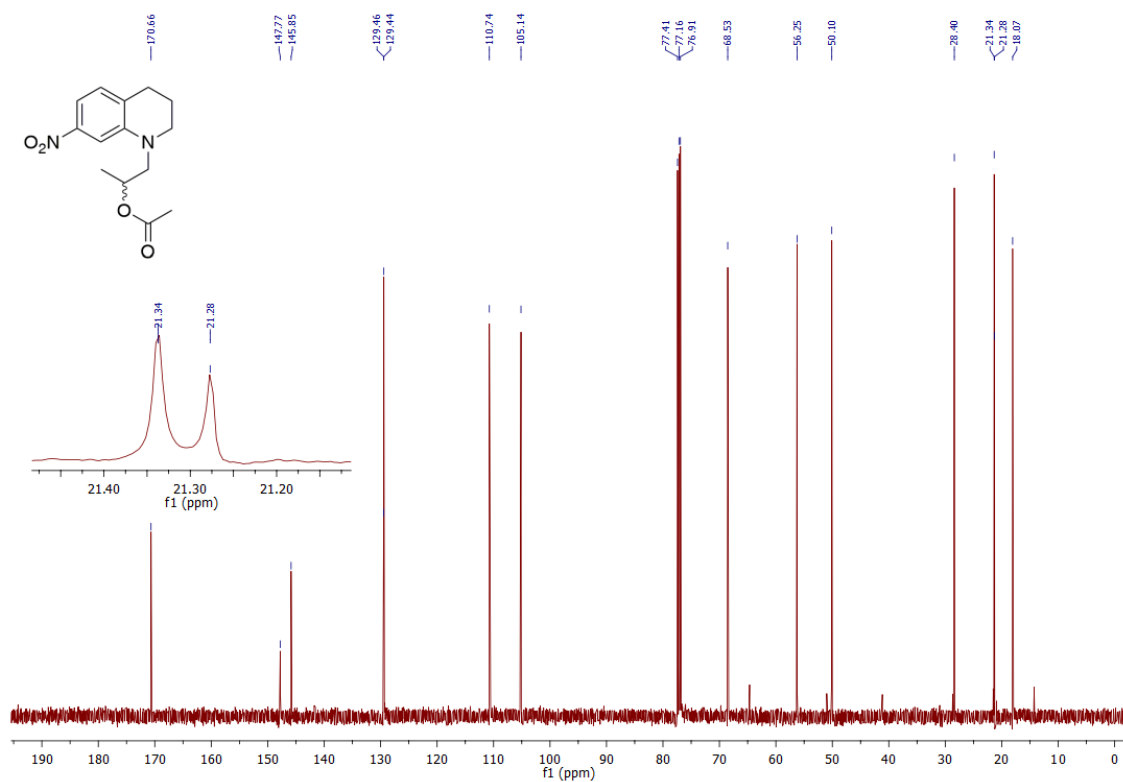

# FTMS spectrum of *rac*-**3c** (ESI-TOF)

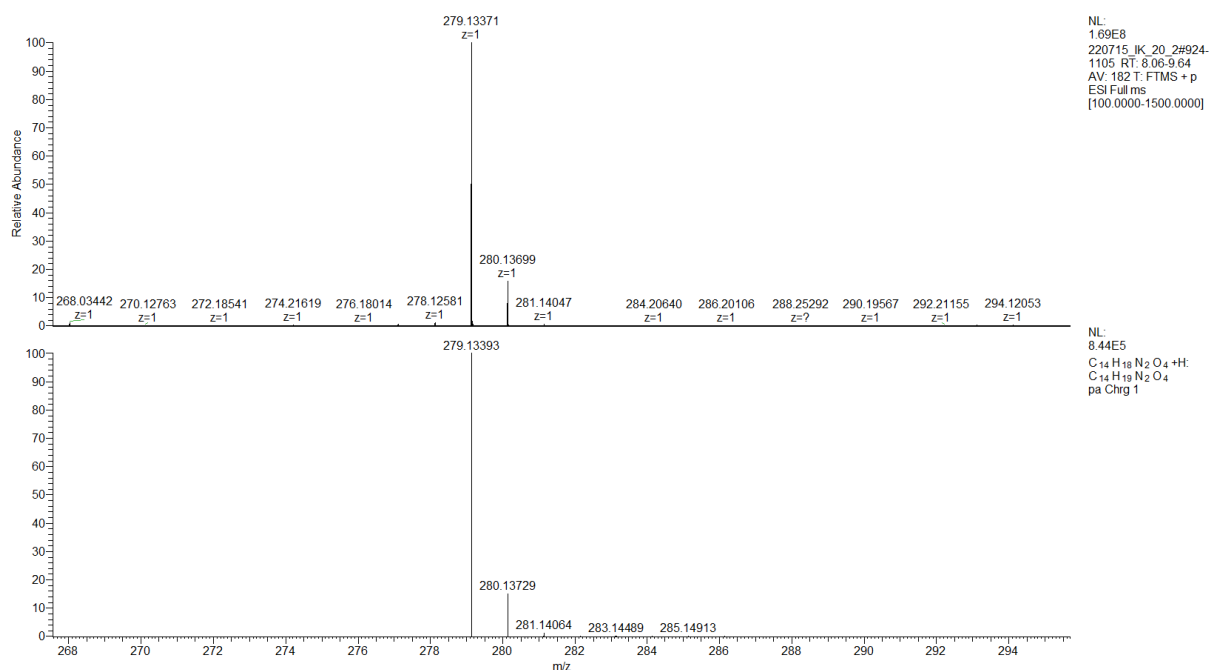

# IR spectrum of *rac*-**3c** (Mineral oil, Nujol)

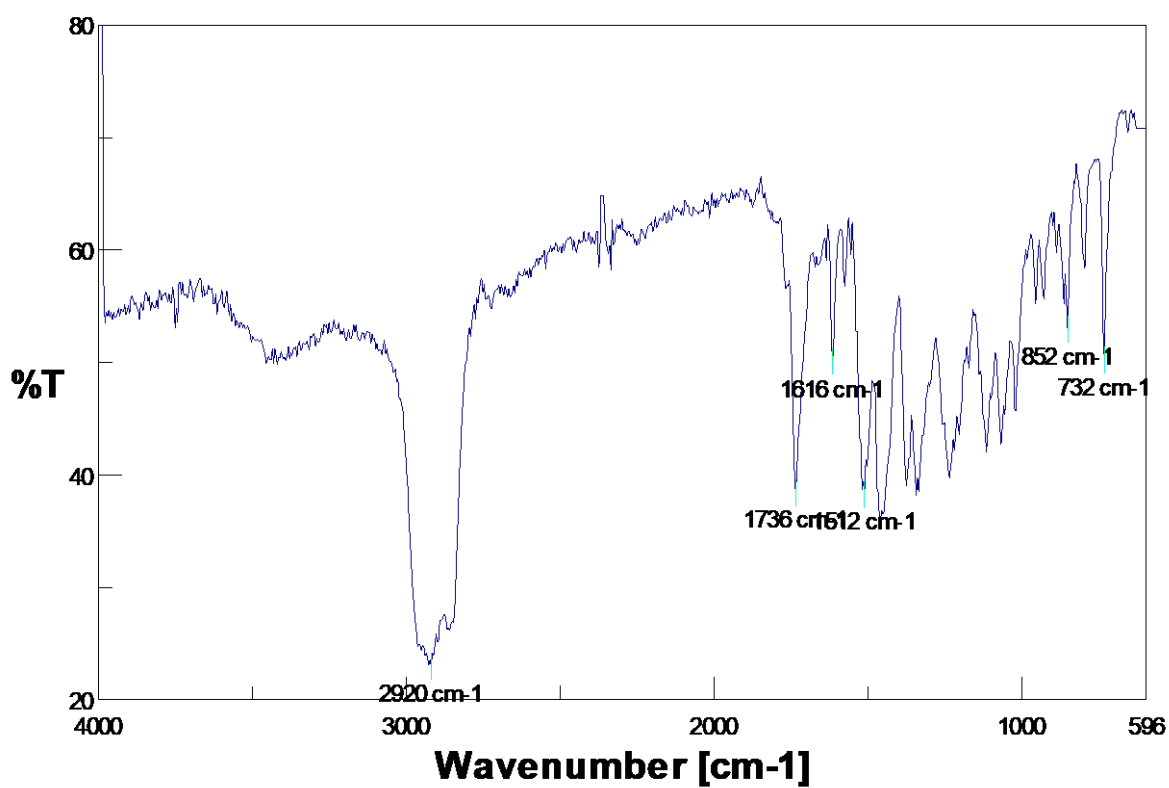

Supplement: s1 [file s1]
